# Supplementary material for: Refining the N-Termini of the SARS-CoV-2 Spike Protein and Its Discrete Receptor-Binding Domain
Source: PubMed Central journal article supplement — J Proteome Res. 2021 Aug 11;20(9):4427–34. doi: 10.1021/acs.jproteome.1c00349 (PMC8419861; doi:10.1021/acs.jproteome.1c00349), 2021-08-11
Supplement: pr1c00349_si_002.pdf [file pr1c00349_si_002.pdf]

# Annotated MS2 Spectra

## Included in this document:

- 1) Spectrum on a single axis
- 2) Multiple pages for manual annotation
- 3) Theoretical fragment masses
  - a) Green shaded cells correspond to identified fragment ions

## Table of Contents

### Pages

### Sequence

### Fragmentation

|       |                                 |       |
|-------|---------------------------------|-------|
| 2-8   | RVQPTESIVRFPNITNLCPFGEVFNATR    | EThcD |
| 9-15  | QRVQPTESIVRFPNITNLCPFGEVFNATR   | EThcD |
| 16-22 | SRVQPTESIVRFPNITNLCPFGEVFNATR   | EThcD |
| 23-29 | SASRVQPTESIVRFPNITNLCPFGEVFNATR | EThcD |
| 30-33 | QCVNLTTR                        | HCD   |
| 34-37 | QCVNLTTR                        | ETD   |
| 38-44 | FRVQPTESIVRFPNITNLCPFGEVFNATR   | EThcD |

RVQPTESIVRFPNITNLCPFGEVFNATR  
EThcD

20200930\_rad\_PepMap\_50cm\_M68\_Trypsin\_PNGaseF\_EThcD #29901 RT: 95.86 AV: 1 NL: 7.65E5  
T: FTMS + c NSI da Full ms2 843.3987@etd16.61 843.3987@hcd15.00 [110.0000-2000.0000]

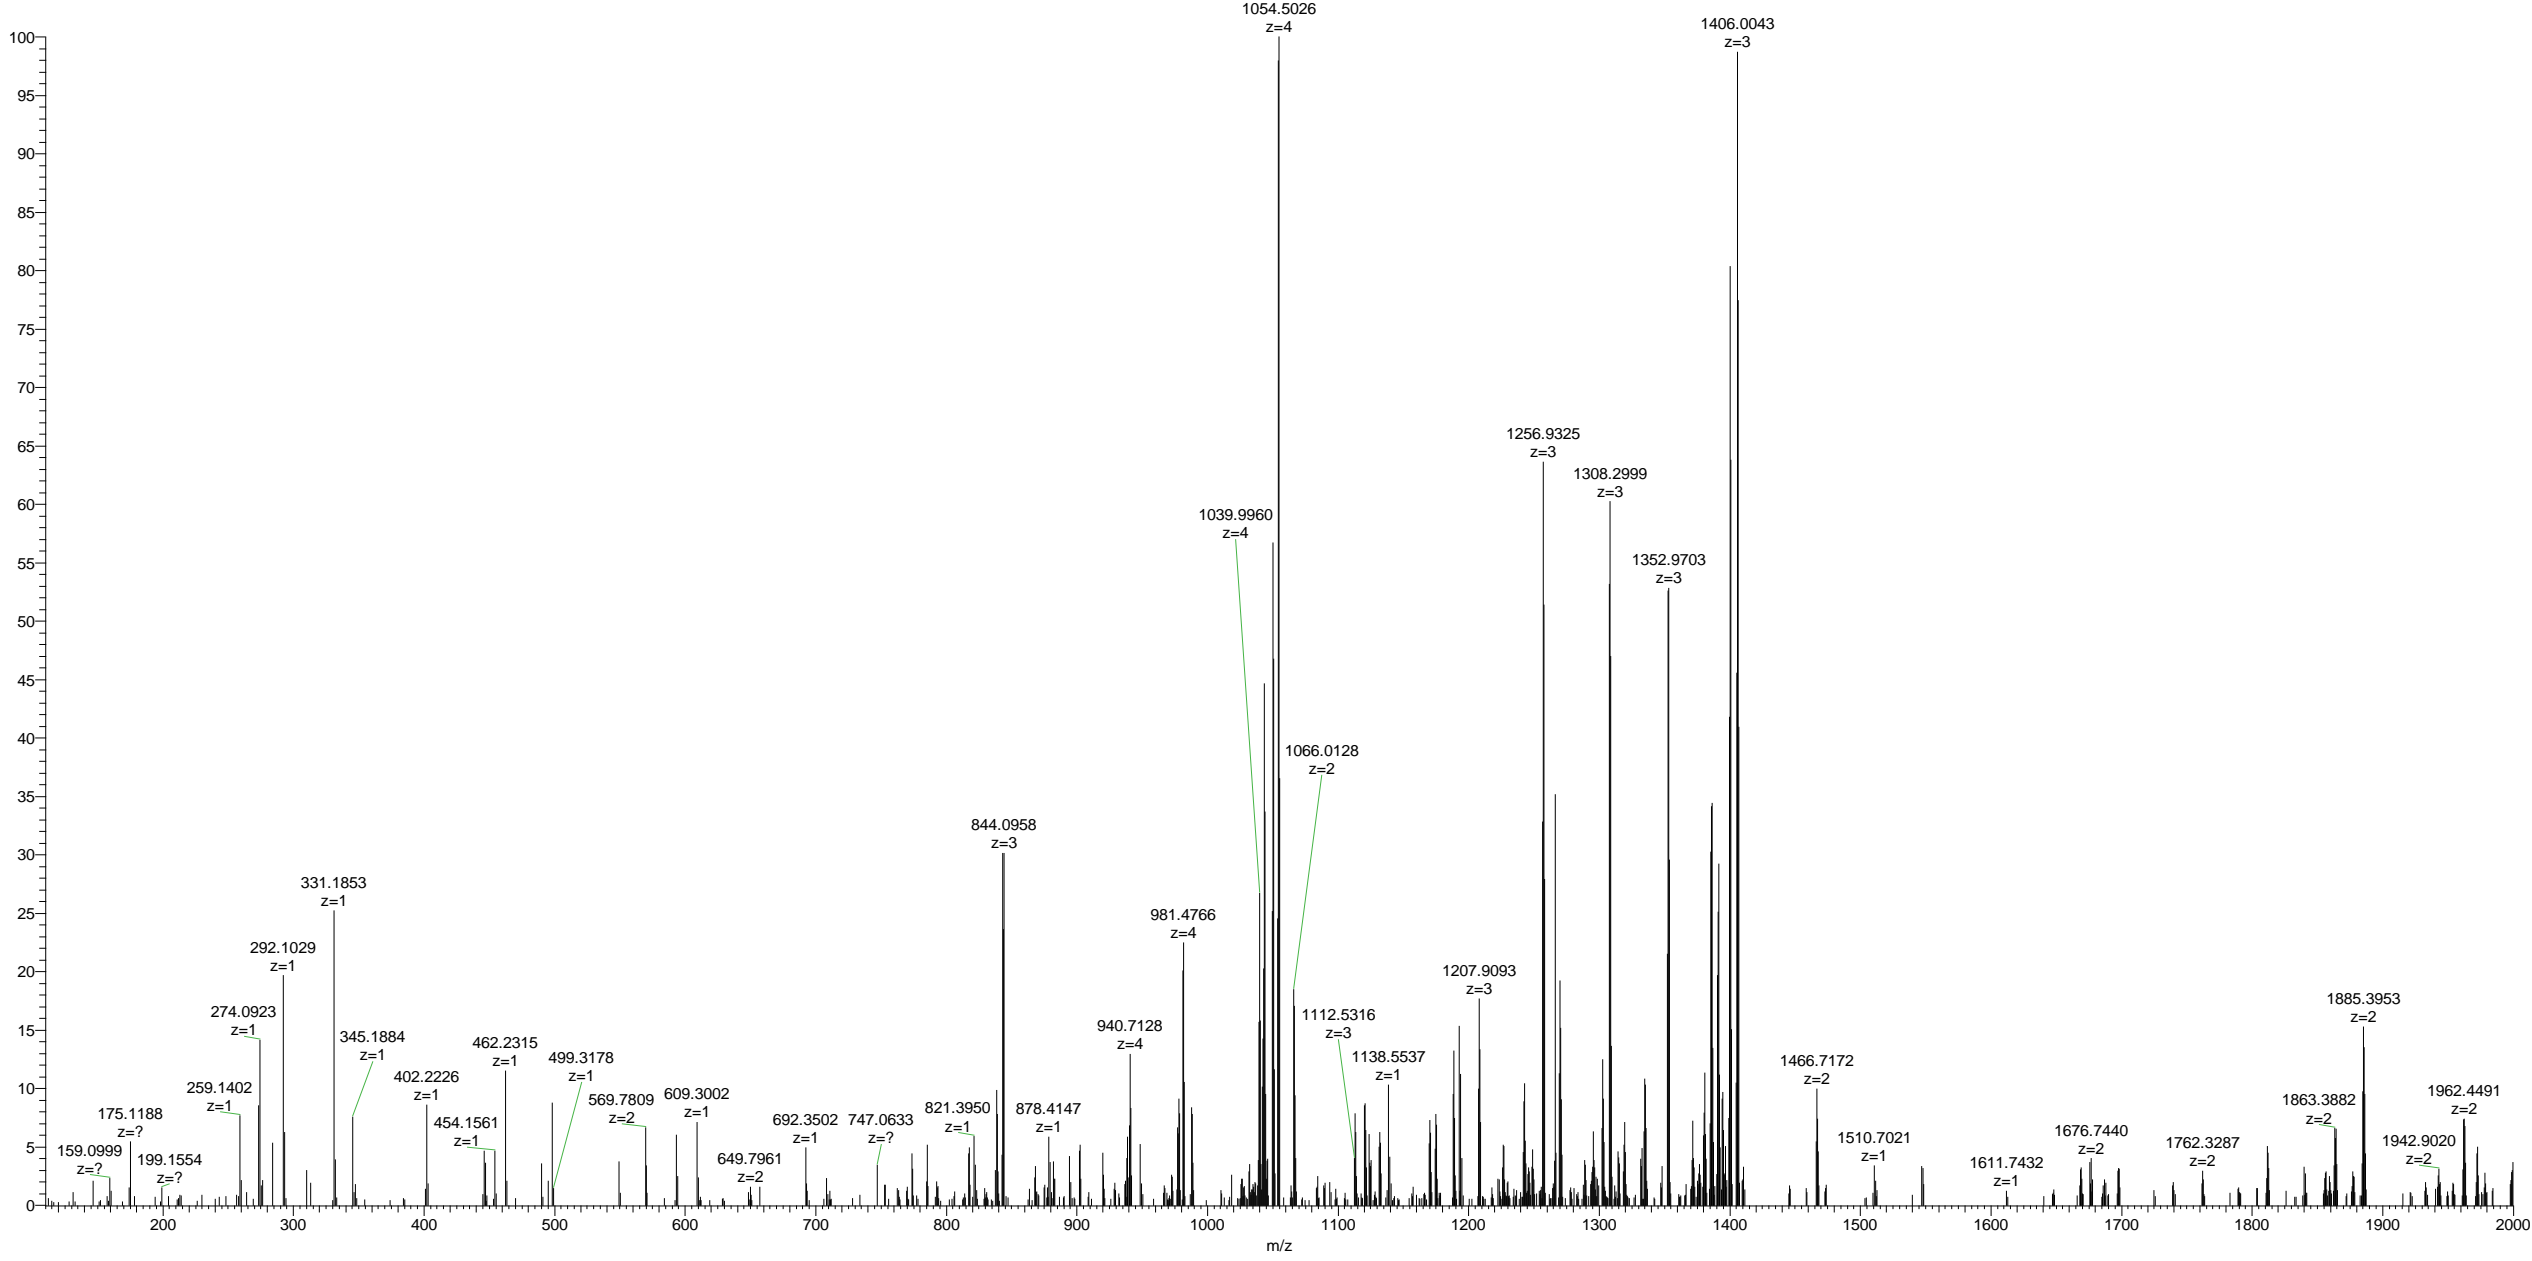

20200930\_rad\_PepMap\_50cm\_M68\_Trypsin\_PNGaseF\_ETHcD #29901 RT: 95.86 AV: 1 NL: 1.93E5  
T: FTMS + c NSI d sa Full ms2 843.3987@etd16.61 843.3987@hcd15.00 [110.0000-2000.0000]

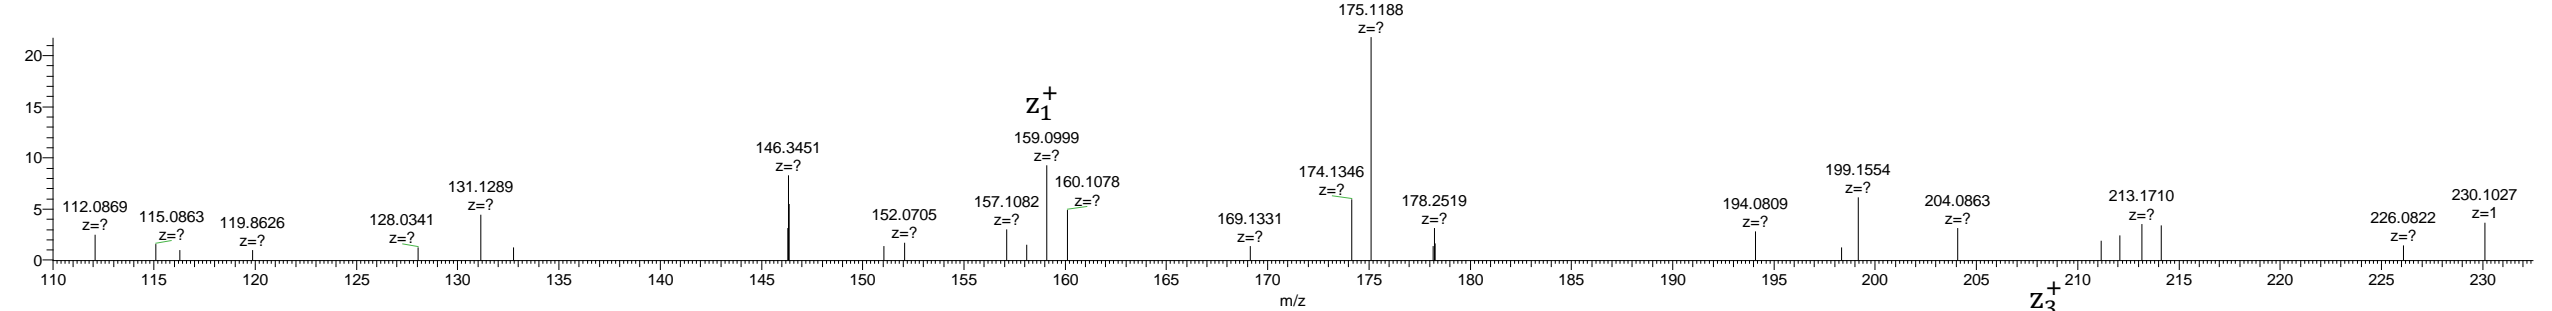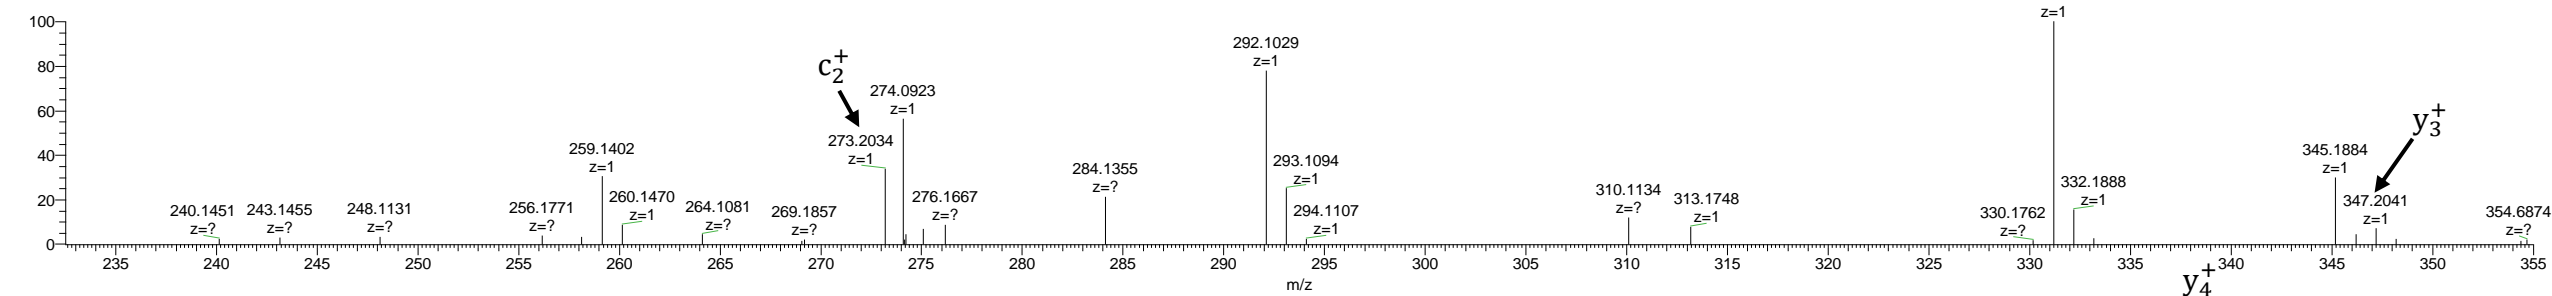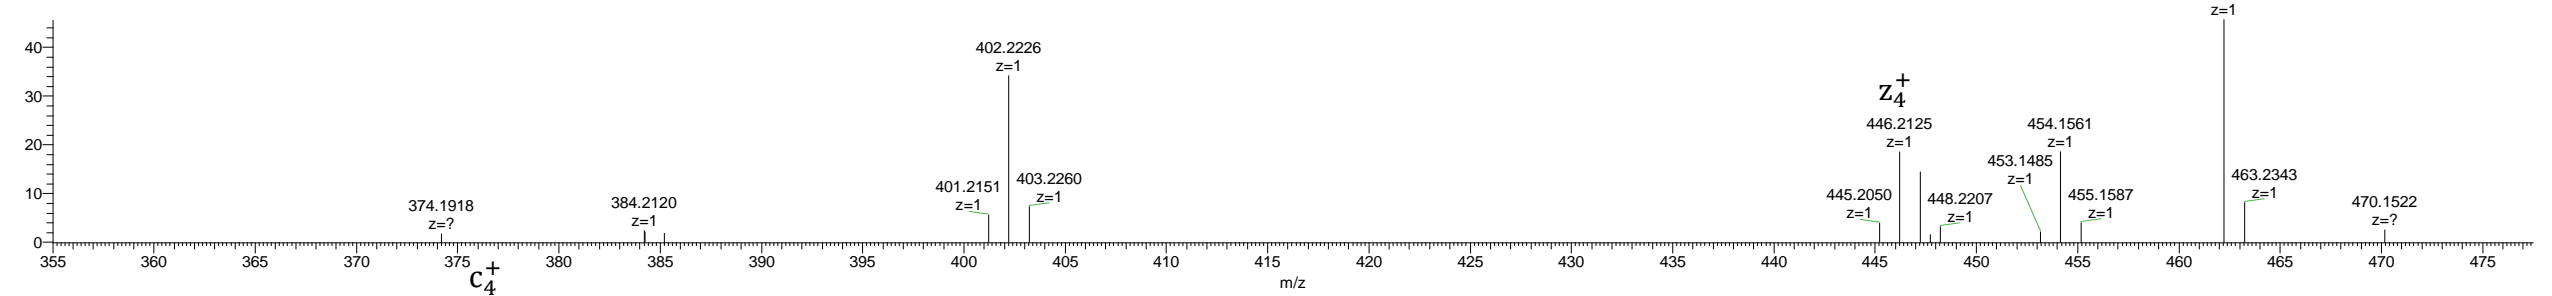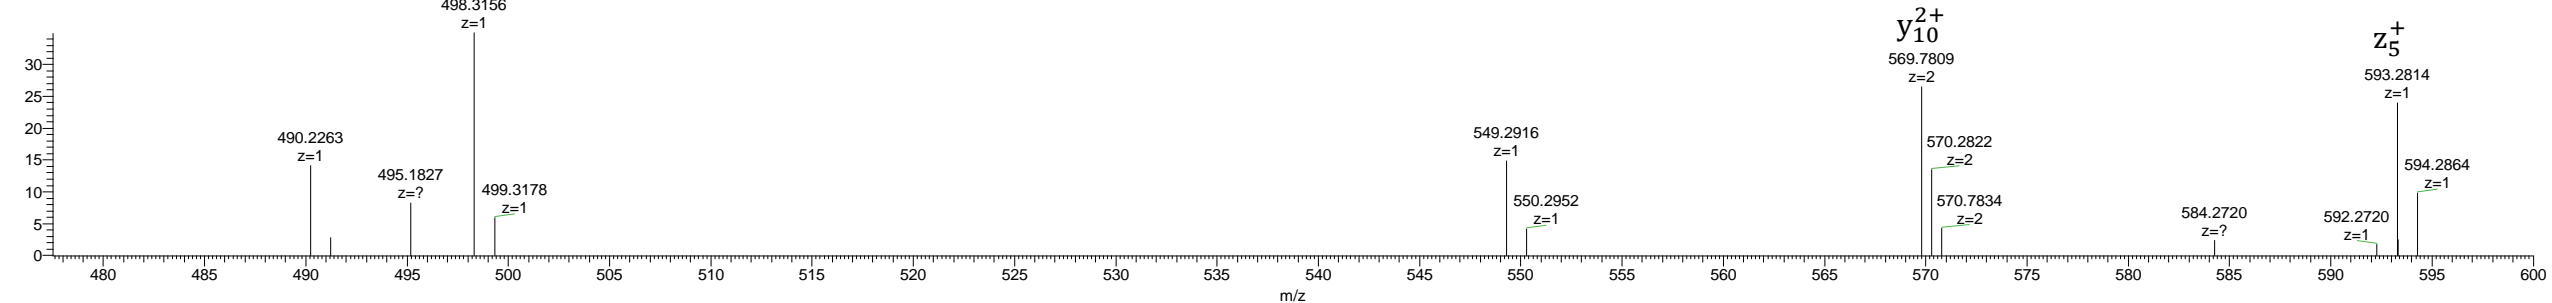

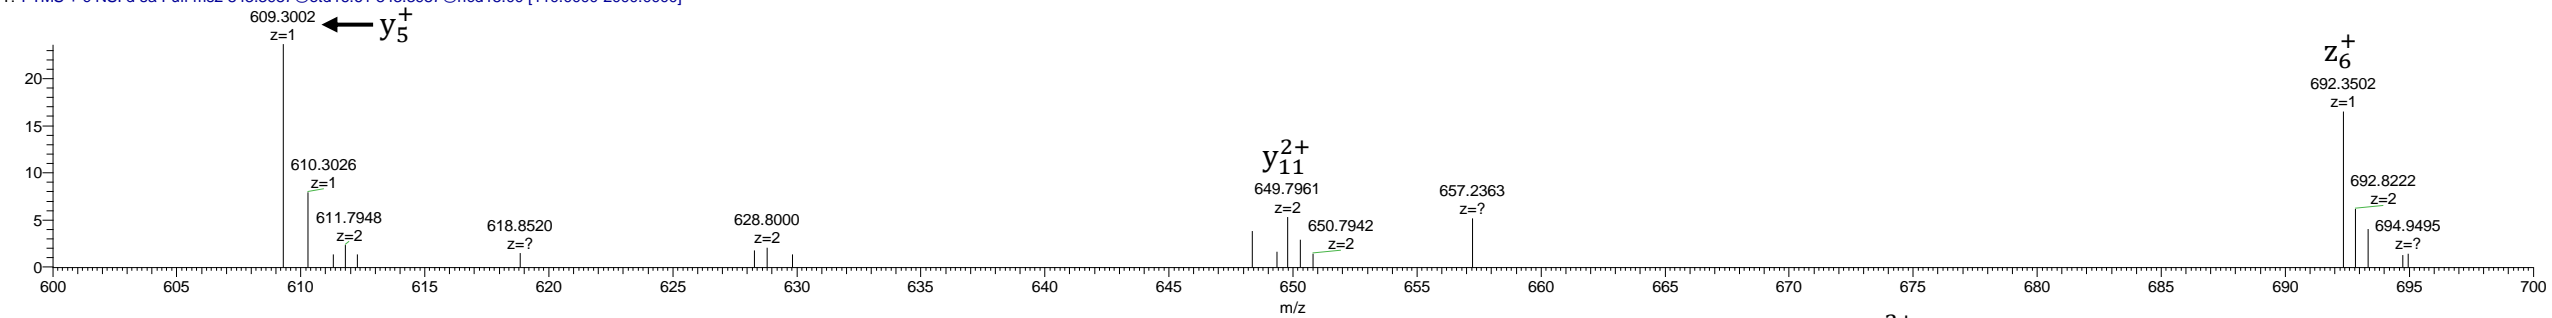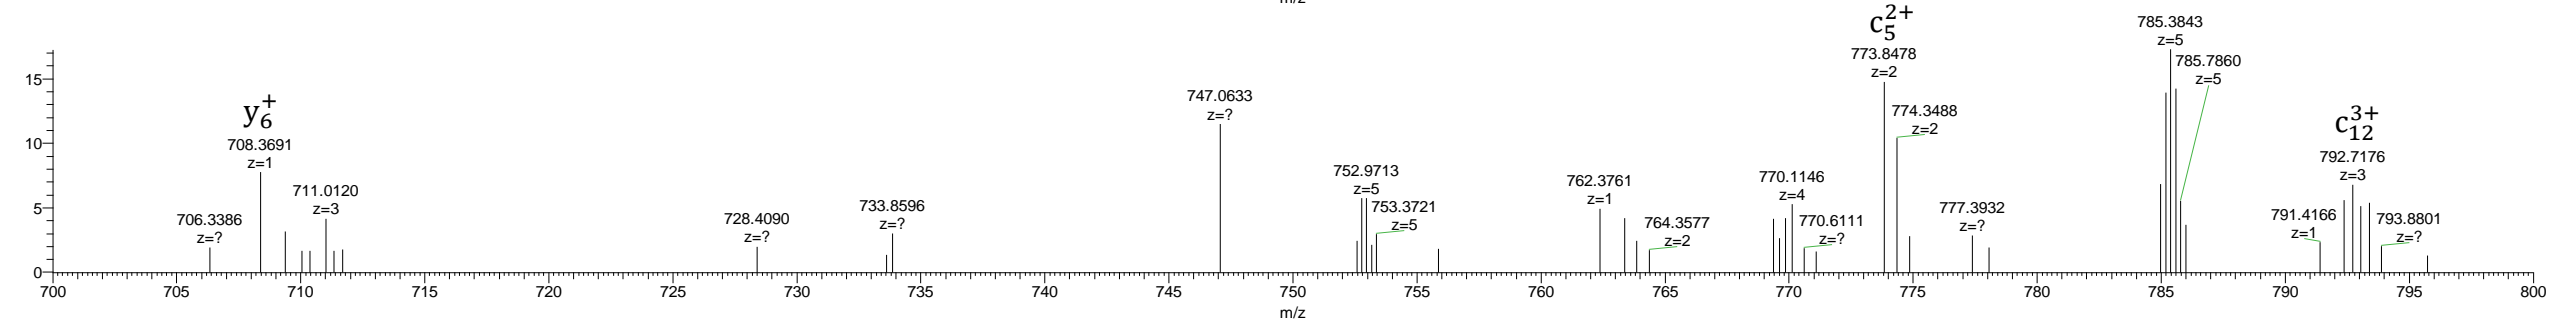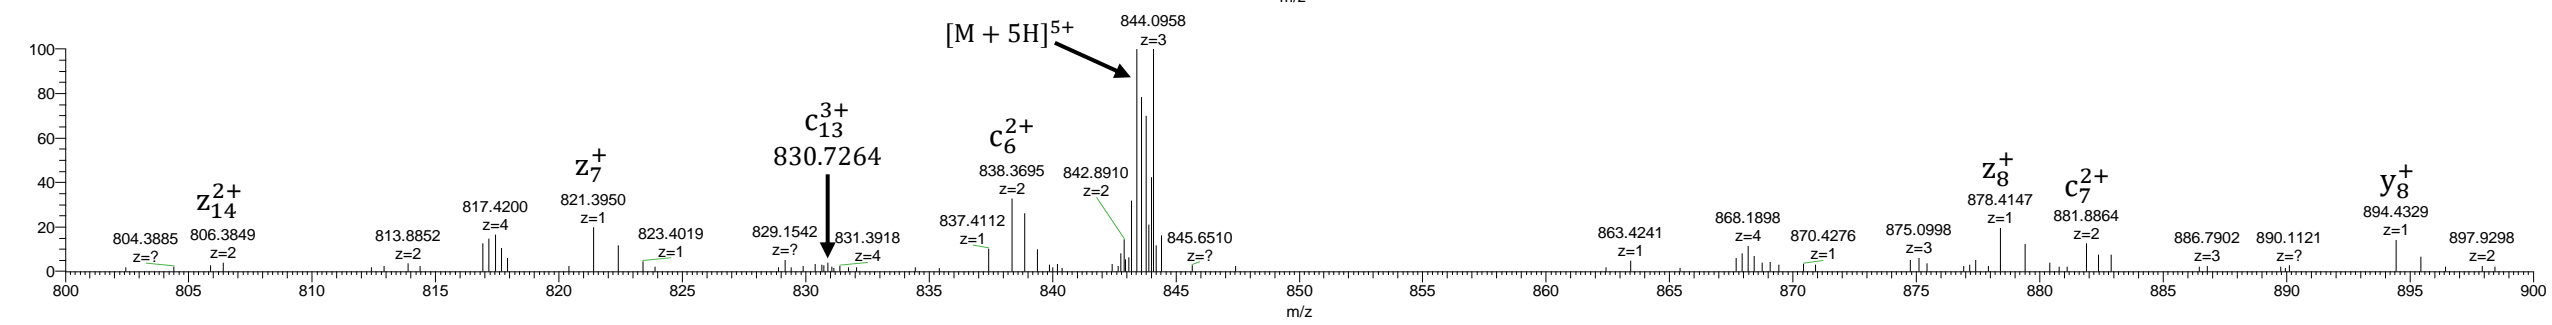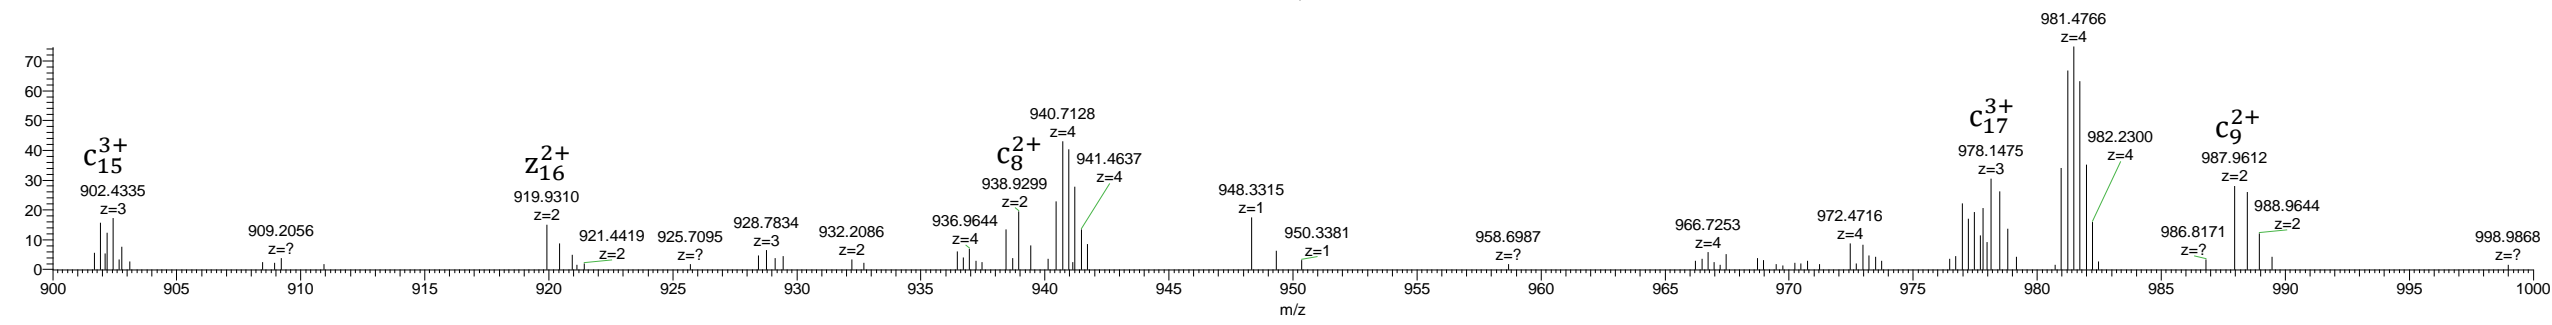

20200930\_rad\_PepMap\_50cm\_M68\_Trypsin\_PNGaseF\_ETHcD #29901 RT: 95.86 AV: 1 NL: 7.65E5  
T: FTMS + c NSI d sa Full ms2 843.3987@etd16.61 843.3987@hcd15.00 [110.0000-2000.0000]

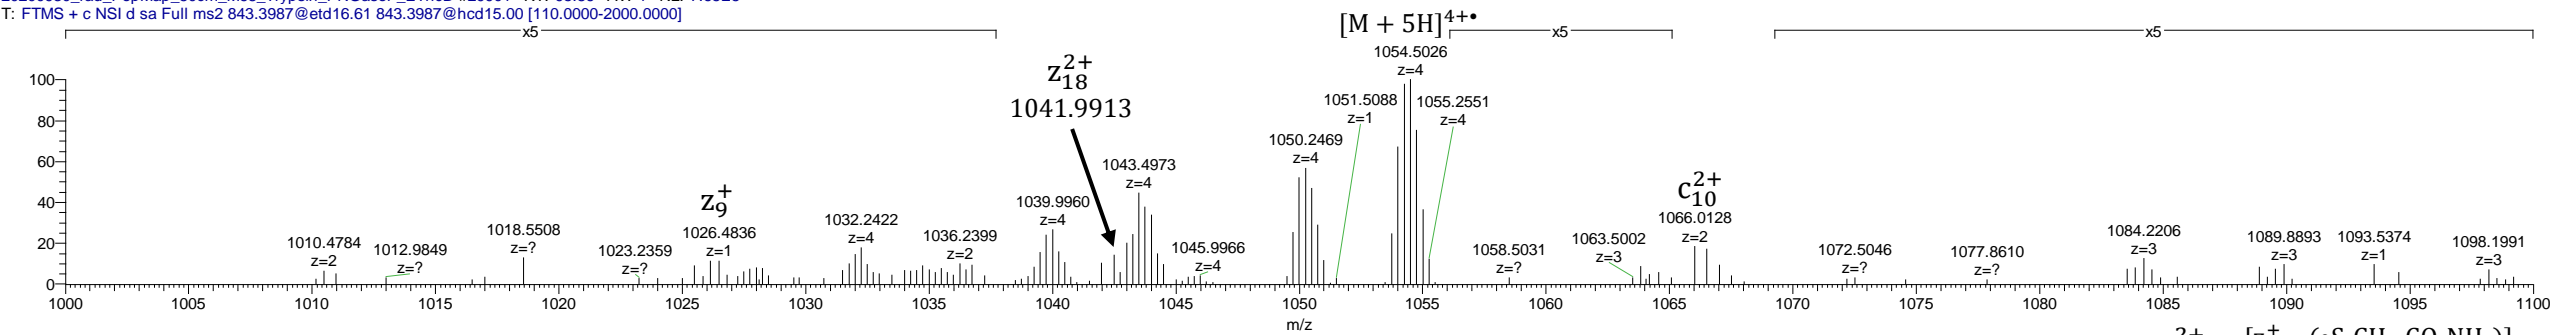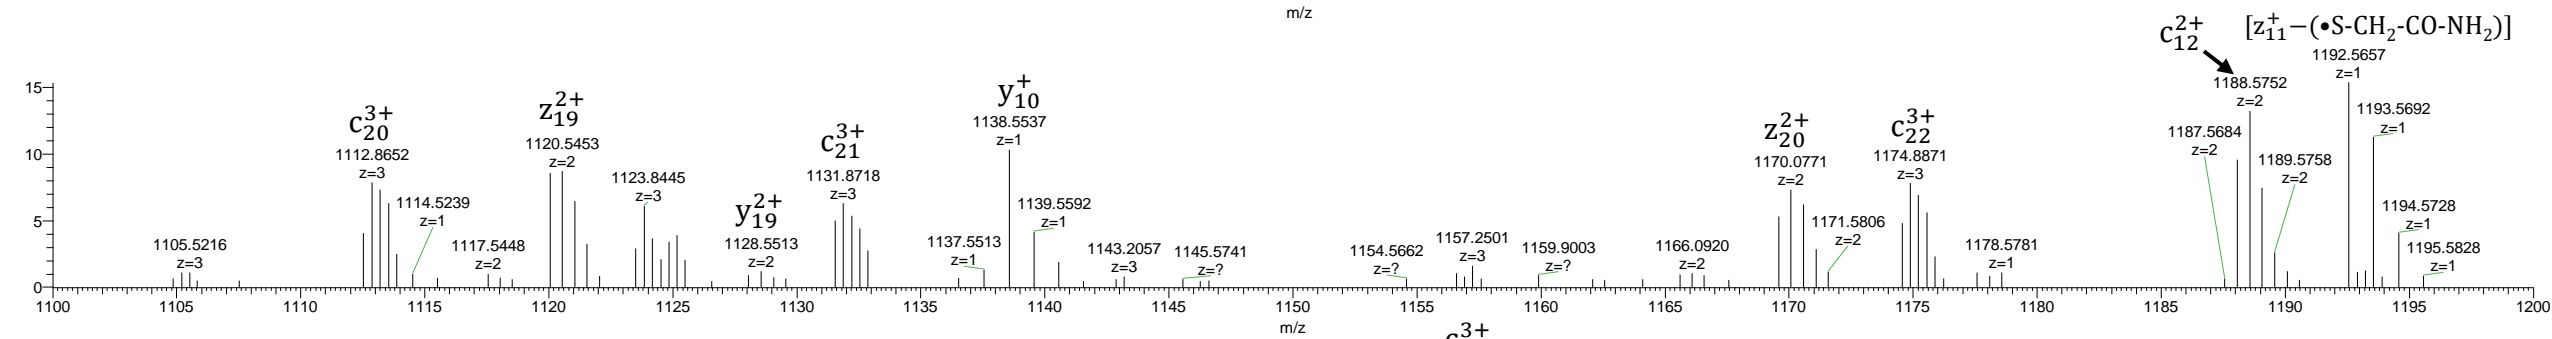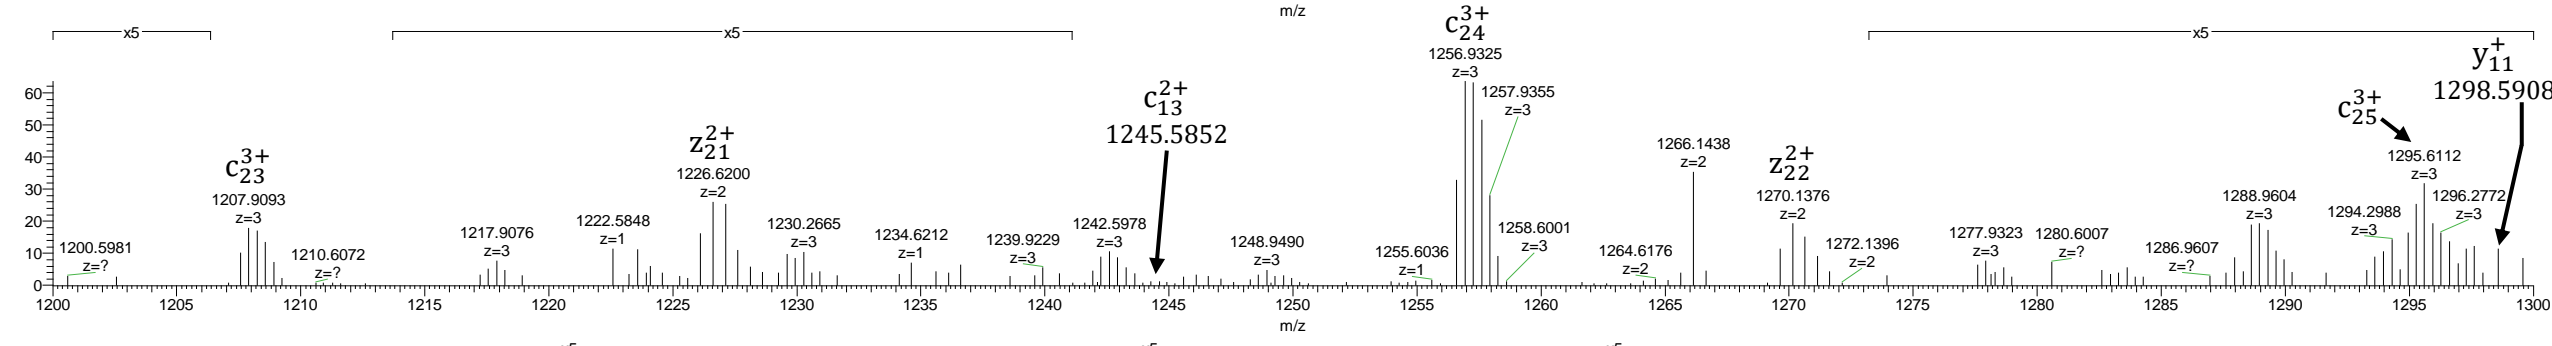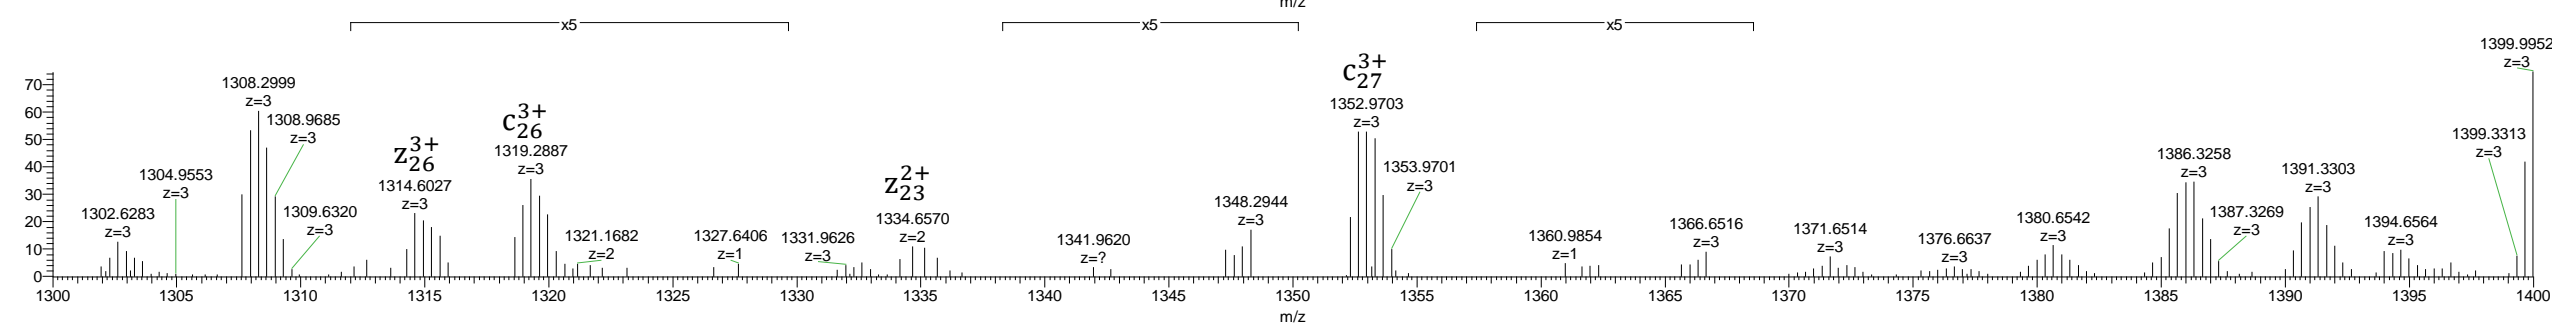

20200930\_rad\_PepMap\_50cm\_M68\_Trypsin\_PNGaseF\_ETHcD #29901 RT: 95.86 AV: 1 NL: 7.55E5  
T: FTMS + c NSI d sa Full ms2 843.3987@etd16.61 843.3987@hcd15.00 [110.0000-2000.0000]

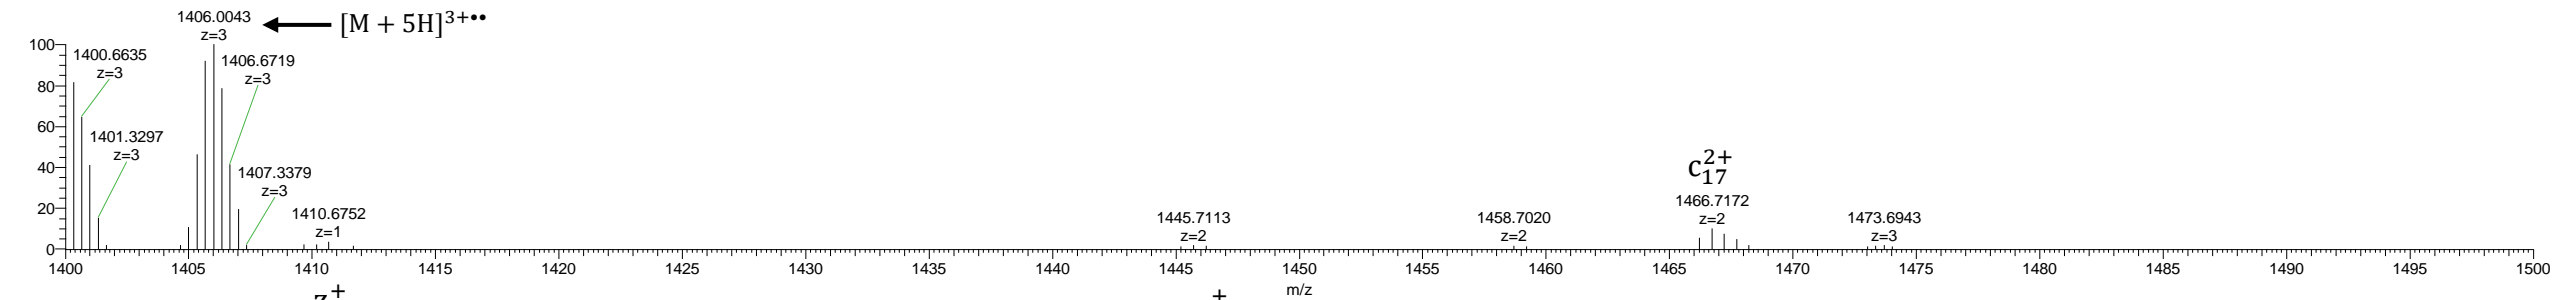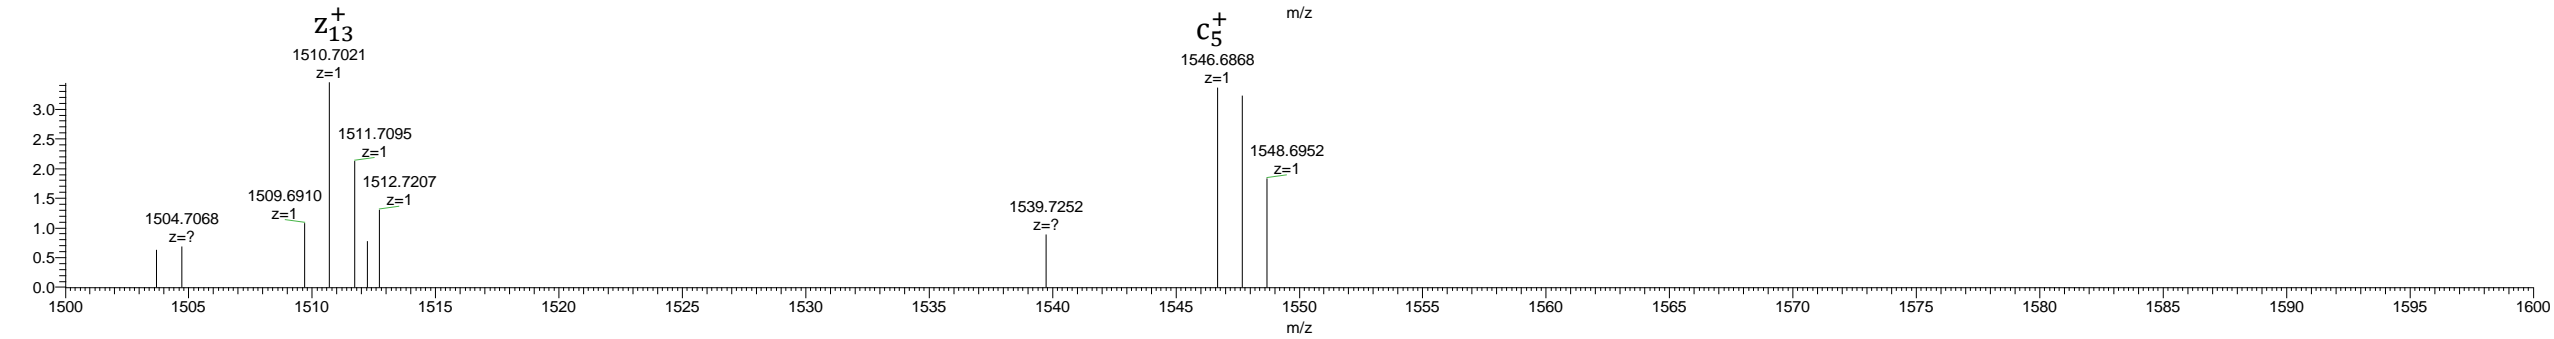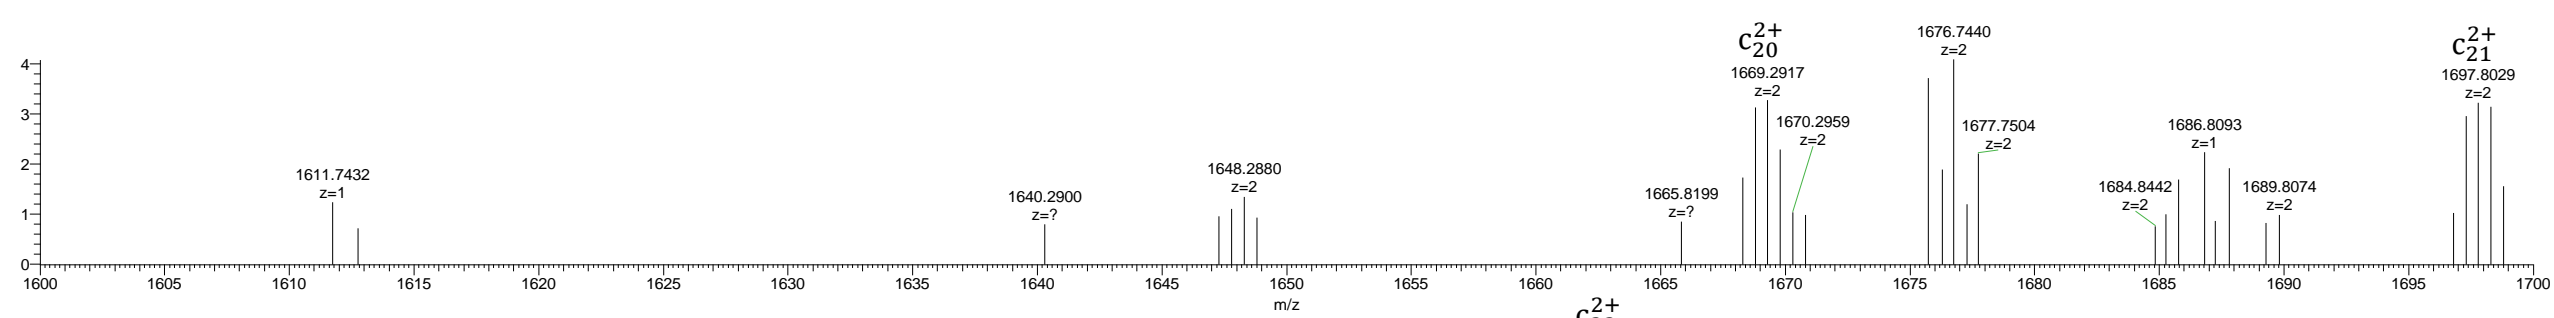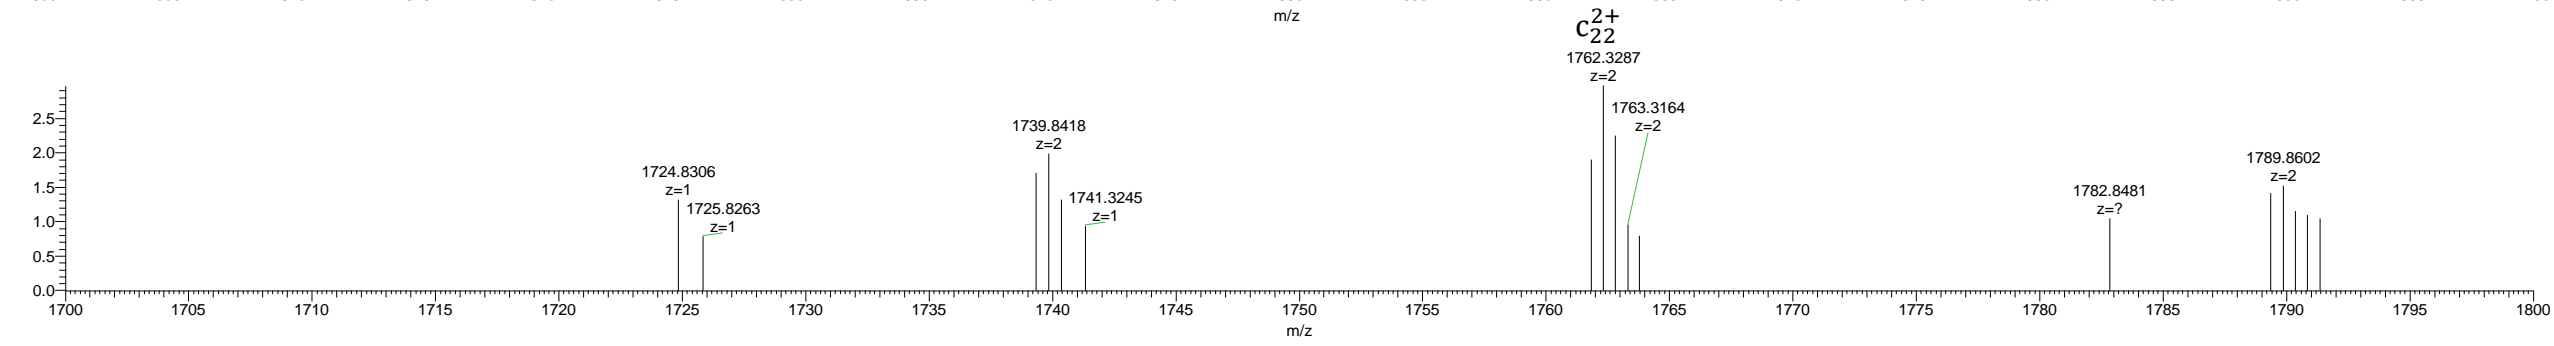

20200930\_rad\_PepMap\_50cm\_M68\_Trypsin\_PNGaseF\_ETHcD #29901 RT: 95.86 AV: 1 NL: 1.17E5  
T: FTMS + c NSI d sa Full ms2 843.3987@etd16.61 843.3987@hcd15.00 [110.0000-2000.0000]

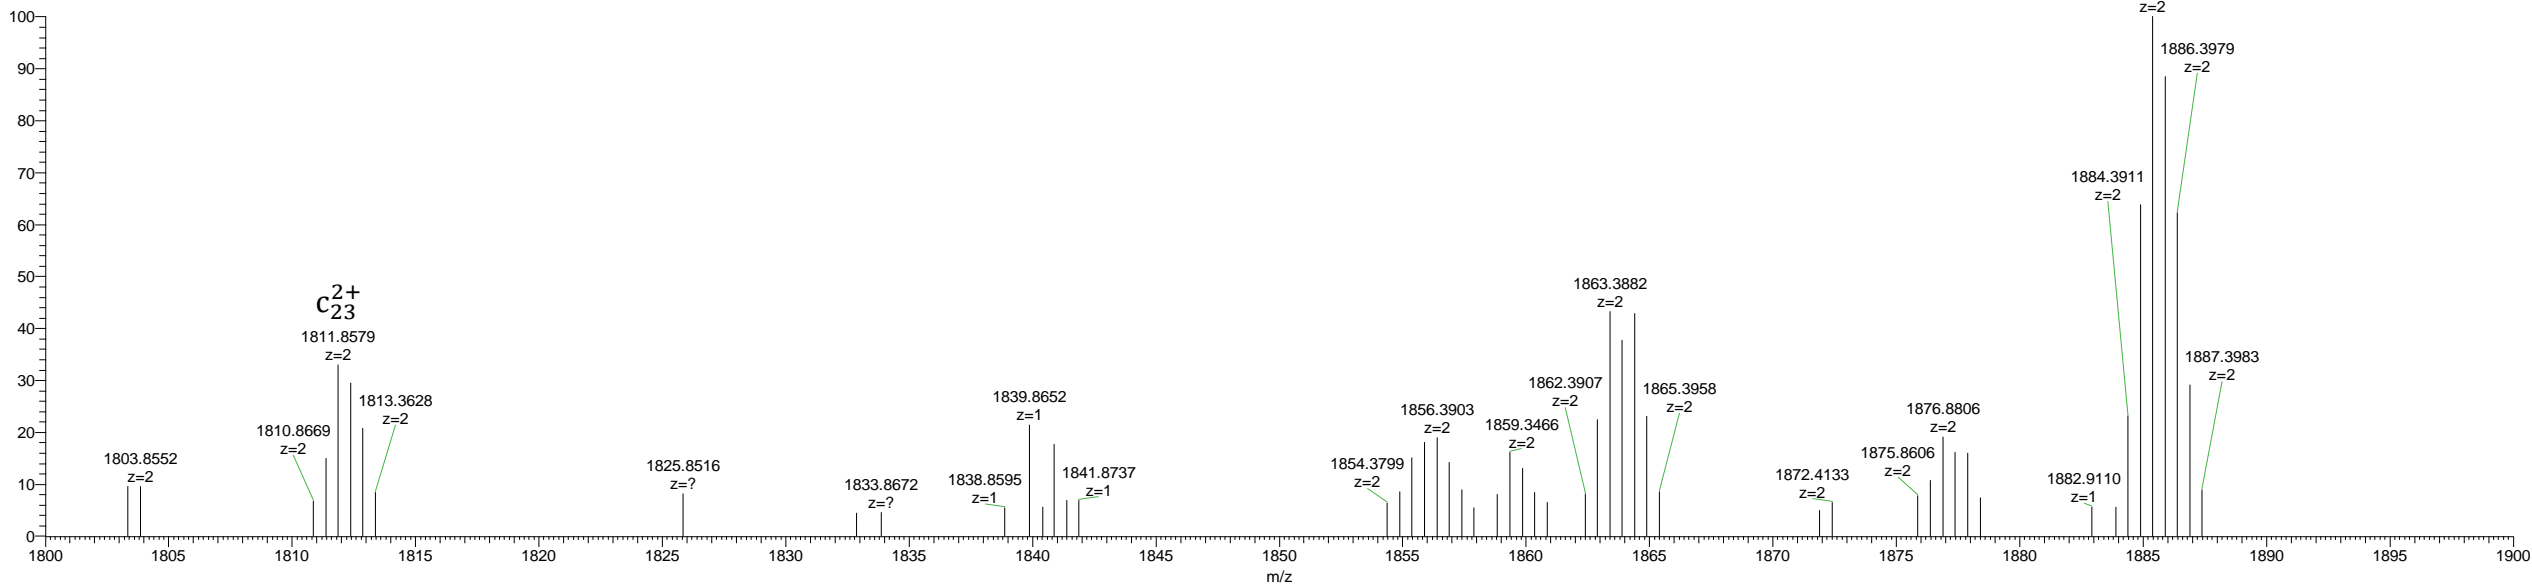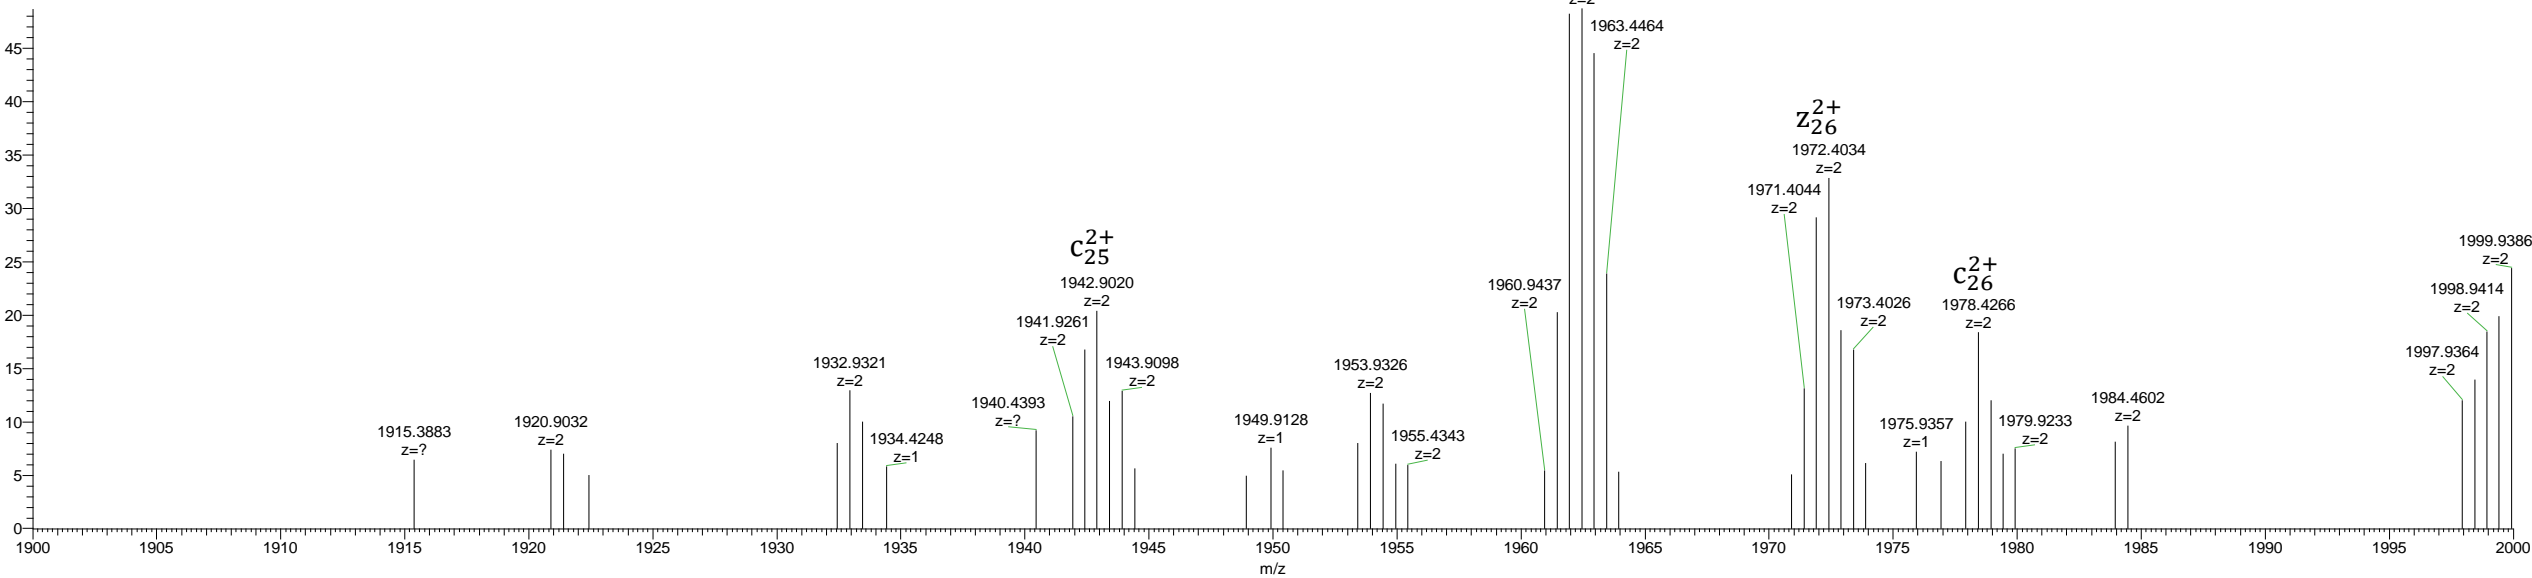

| c4+       | c3+       | c2+       | c+        |    | AA         |    | z•+       | z•2+      | z•3+      | z•4+      |
|-----------|-----------|-----------|-----------|----|------------|----|-----------|-----------|-----------|-----------|
| 44.2892   | 58.7165   | 87.5711   | 174.1349  | 1  | R          | 28 |           |           |           |           |
| 69.0563   | 91.7393   | 137.1053  | 273.2034  | 2  | V          | 27 | 4039.8502 | 2020.4287 | 1347.2882 | 1010.7180 |
| 101.0709  | 134.4255  | 201.1346  | 401.2619  | 3  | Q          | 26 | 3940.7818 | 1970.8945 | 1314.2654 | 985.9509  |
| 125.3341  | 166.7764  | 249.6610  | 498.3147  | 4  | P          | 25 | 3812.7232 | 1906.8652 | 1271.5792 | 953.9362  |
| 387.4268  | 516.2333  | 773.8463  | 1546.6854 | 5  | T (Glycan) | 24 | 3715.6704 | 1858.3388 | 1239.2283 | 929.6731  |
| 419.6875  | 559.2475  | 838.3676  | 1675.7280 | 6  | E          | 23 | 2667.2997 | 1334.1535 | 889.7714  | 667.5804  |
| 441.4455  | 588.2582  | 881.8836  | 1762.7600 | 7  | S          | 22 | 2538.2571 | 1269.6322 | 846.7572  | 635.3197  |
| 469.7165  | 625.9529  | 938.4257  | 1875.8441 | 8  | I          | 21 | 2451.2251 | 1226.1162 | 817.7465  | 613.5617  |
| 494.4836  | 658.9757  | 987.9599  | 1974.9125 | 9  | V          | 20 | 2338.1410 | 1169.5741 | 780.0519  | 585.2907  |
| 533.5089  | 711.0094  | 1066.0104 | 2131.0136 | 10 | R          | 19 | 2239.0726 | 1120.0399 | 747.0290  | 560.5236  |
| 570.2760  | 760.0322  | 1139.5446 | 2278.0820 | 11 | F          | 18 | 2082.9715 | 1041.9894 | 694.9953  | 521.4983  |
| 594.5391  | 792.3831  | 1188.0710 | 2375.1348 | 12 | P          | 17 | 1935.9031 | 968.4552  | 645.9725  | 484.7312  |
| 623.2959  | 830.7254  | 1245.5845 | 2490.1617 | 13 | N (deam)   | 16 | 1838.8503 | 919.9288  | 613.6216  | 460.4680  |
| 651.5669  | 868.4201  | 1302.1265 | 2603.2458 | 14 | I          | 15 | 1723.8234 | 862.4153  | 575.2793  | 431.7113  |
| 676.8288  | 902.1027  | 1352.6504 | 2704.2935 | 15 | T          | 14 | 1610.7393 | 805.8733  | 537.5846  | 403.4403  |
| 705.3395  | 940.1170  | 1409.6718 | 2818.3364 | 16 | N          | 13 | 1509.6917 | 755.3495  | 503.9021  | 378.1784  |
| 733.6106  | 977.8117  | 1466.2139 | 2931.4204 | 17 | L          | 12 | 1395.6487 | 698.3280  | 465.8878  | 349.6676  |
| 773.6182  | 1031.1552 | 1546.2292 | 3091.4511 | 18 | C          | 11 | 1282.5647 | 641.7860  | 428.1931  | 321.3966  |
| 797.8814  | 1063.5061 | 1594.7556 | 3188.5039 | 19 | P          | 10 | 1122.5340 | 561.7706  | 374.8495  | 281.3890  |
| 834.6485  | 1112.5289 | 1668.2898 | 3335.5723 | 20 | F          | 9  | 1025.4812 | 513.2443  | 342.4986  | 257.1258  |
| 848.9039  | 1131.5361 | 1696.8005 | 3392.5937 | 21 | G          | 8  | 878.4128  | 439.7101  | 293.4758  | 220.3587  |
| 881.1645  | 1174.5503 | 1761.3218 | 3521.6363 | 22 | E          | 7  | 821.3914  | 411.1993  | 274.4686  | 206.1033  |
| 905.9316  | 1207.5731 | 1810.8560 | 3620.7047 | 23 | V          | 6  | 692.3488  | 346.6780  | 231.4544  | 173.8426  |
| 942.6987  | 1256.5959 | 1884.3902 | 3767.7732 | 24 | F          | 5  | 593.2804  | 297.1438  | 198.4316  | 149.0755  |
| 971.4555  | 1294.9382 | 1941.9037 | 3882.8001 | 25 | N (deam)   | 4  | 446.2119  | 223.6096  | 149.4088  | 112.3084  |
| 989.2148  | 1318.6172 | 1977.4222 | 3953.8372 | 26 | A          | 3  | 331.1850  | 166.0961  | 111.0665  | 83.5517   |
| 1014.4767 | 1352.2998 | 2027.9461 | 4054.8849 | 27 | T          | 2  | 260.1479  | 130.5776  | 87.3875   | 65.7924   |
|           |           |           |           | 28 | R          | 1  | 159.1002  | 80.0537   | 53.7049   | 40.5305   |

$$z_{11} : \begin{array}{r} 1282.5647 \\ - \quad 90.0014 \\ \hline 1192.5633 \end{array} \quad (\bullet\text{-S-CH}_2\text{-CO-NH}_2)$$



QRVQPTESIVRFPNITNLCPFGEVFNATR  
EThcD

20200930\_rad\_PepMap\_50cm\_Sinai\_Trypsin\_PNGaseF\_EThcD #25959 RT: 104.86 AV: 1 NL: 4.10E5  
T: FTMS + c NSI d sa Full ms2 1082.0125@etd25.96 1082.0125@hcd15.00 [110.0000-2000.0000]

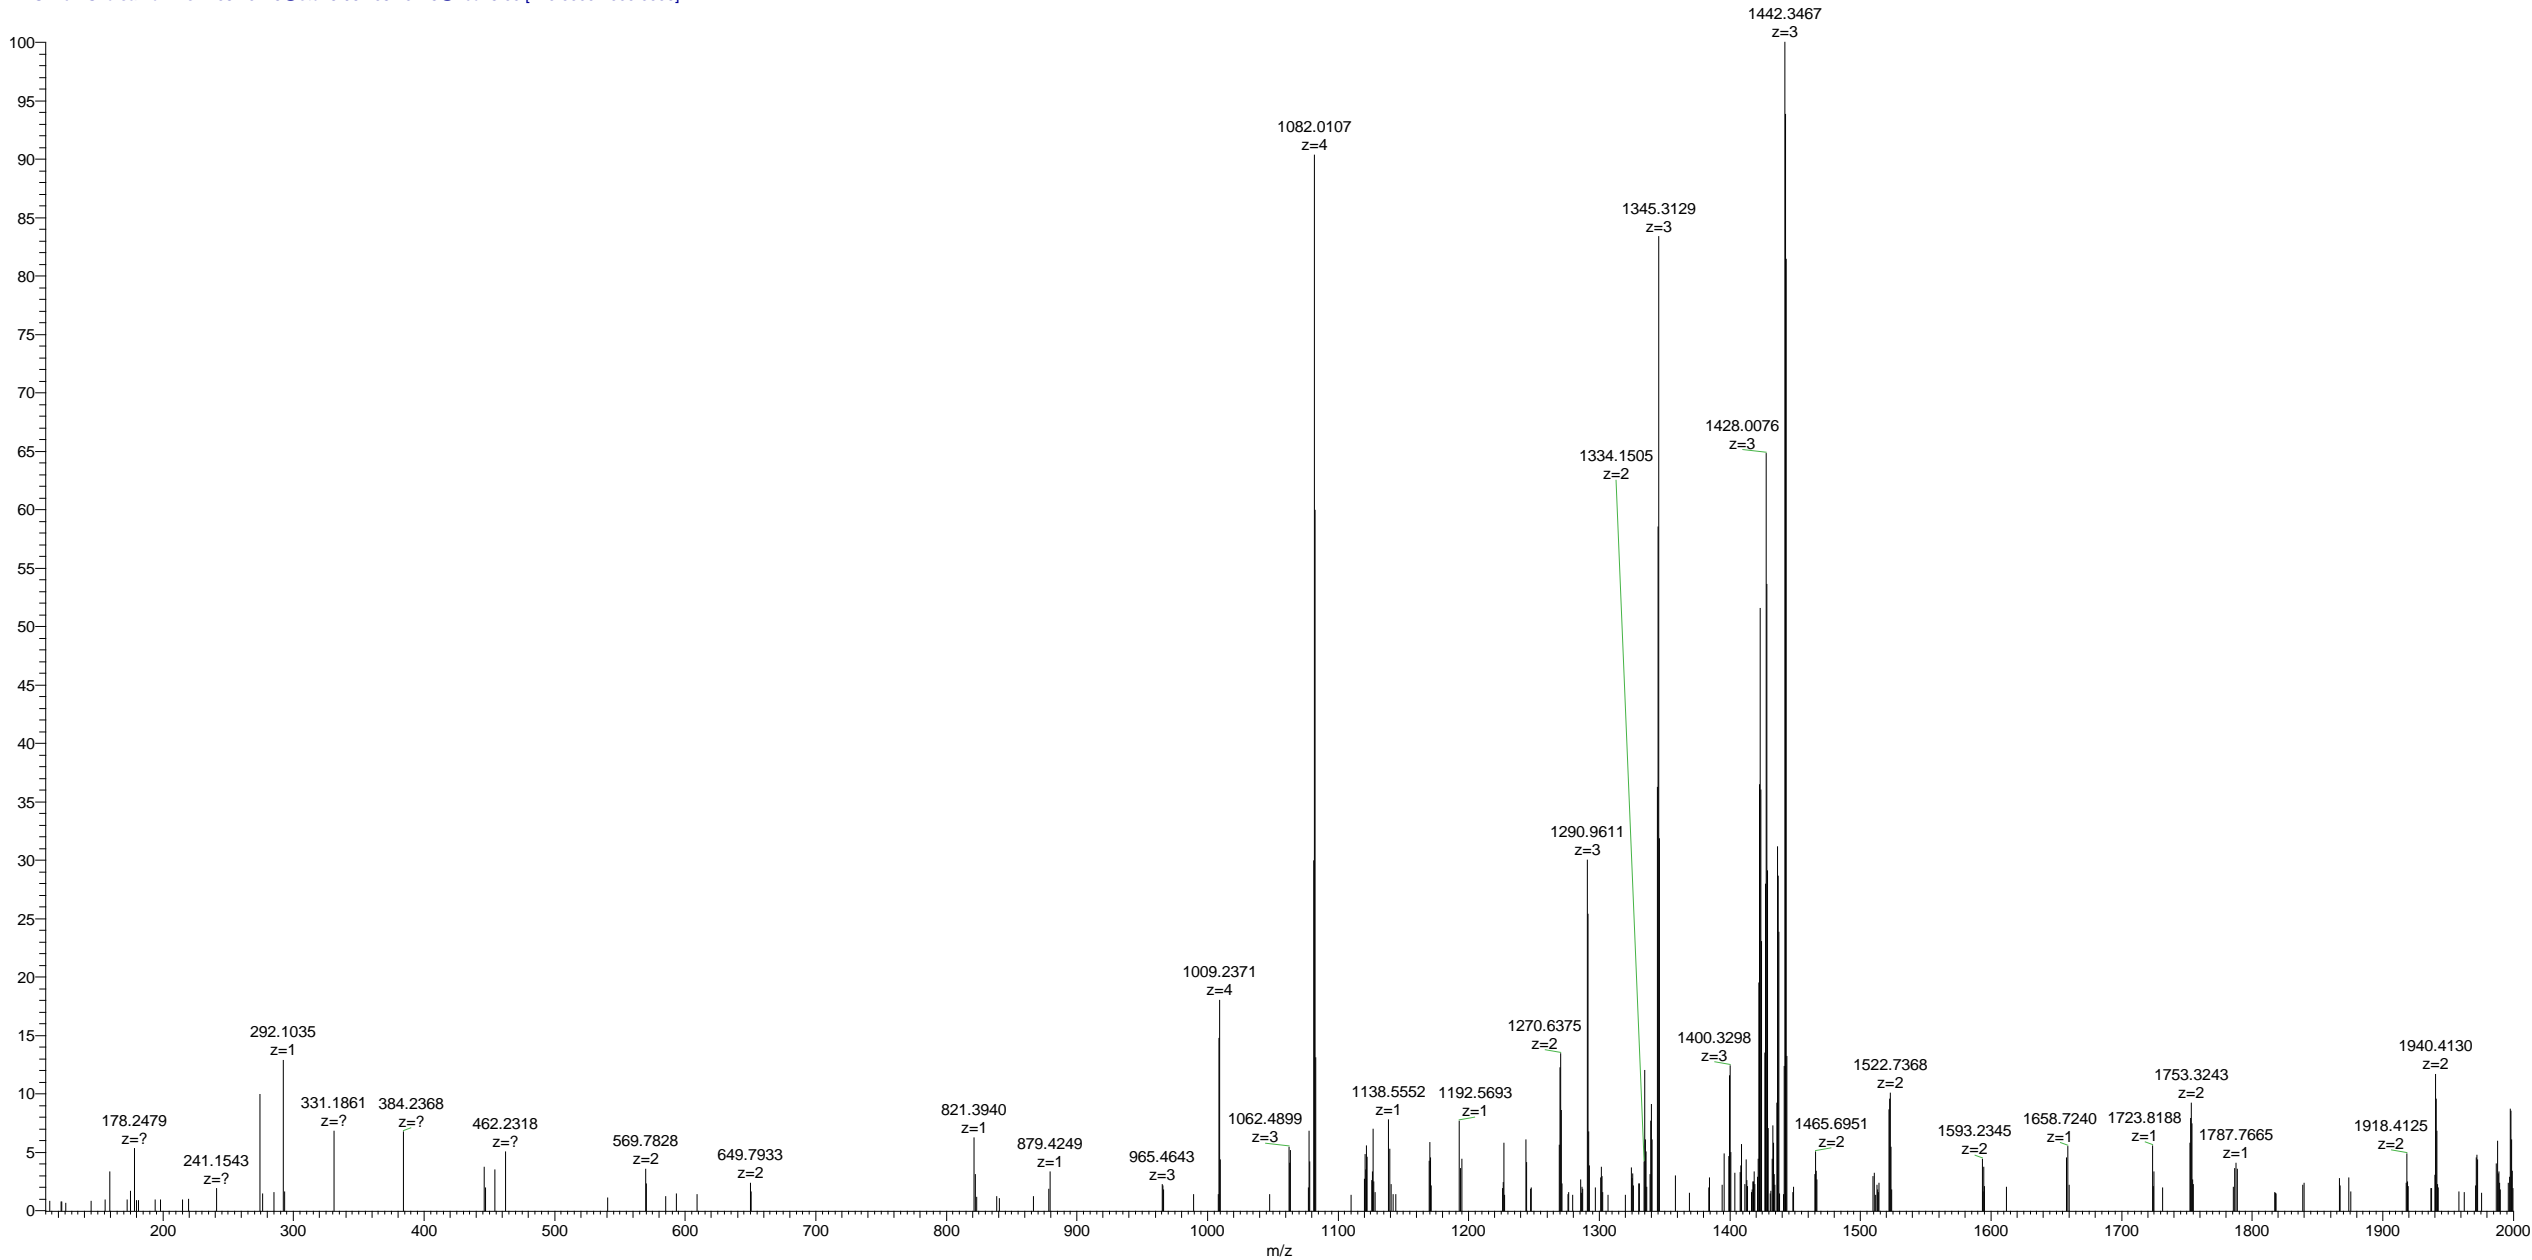

20200930\_rad\_PepMap\_50cm\_Sinai\_Trypsin\_PNGaseF\_ETHcD #25959 RT: 104.86 AV: 1 NL: 5.29E4  
T: FTMS + c NSI d sa Full ms2 1082.0125@etd25.96 1082.0125@hcd15.00 [110.0000-2000.0000]

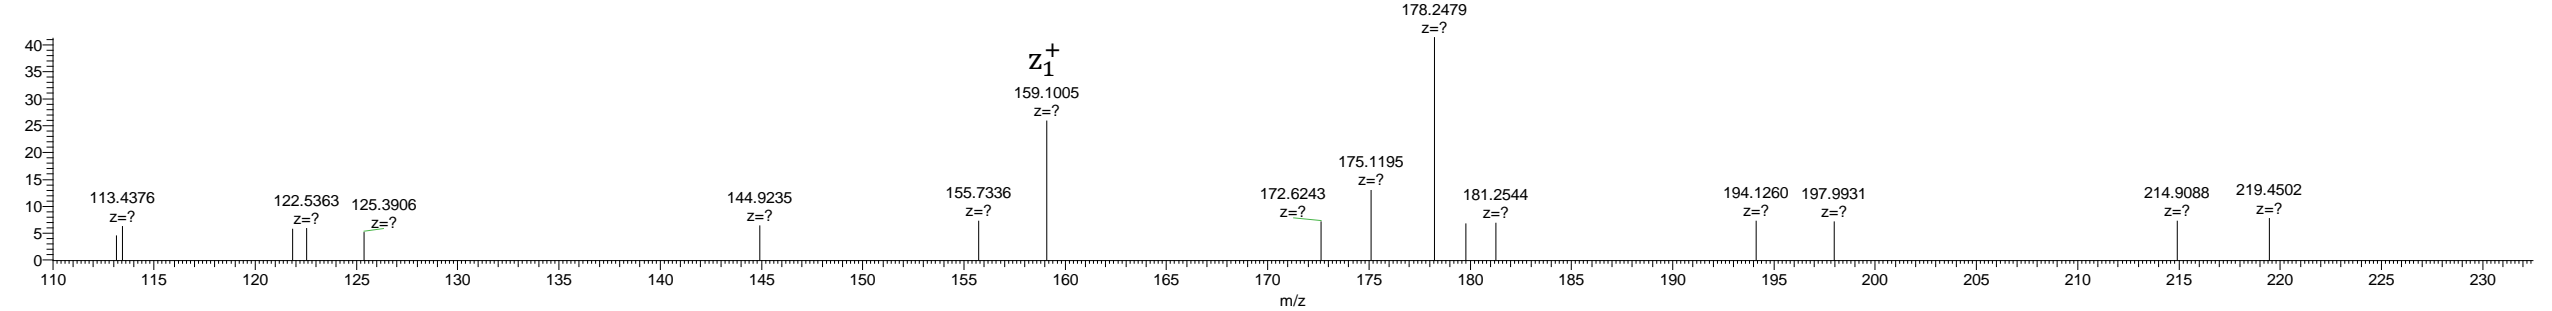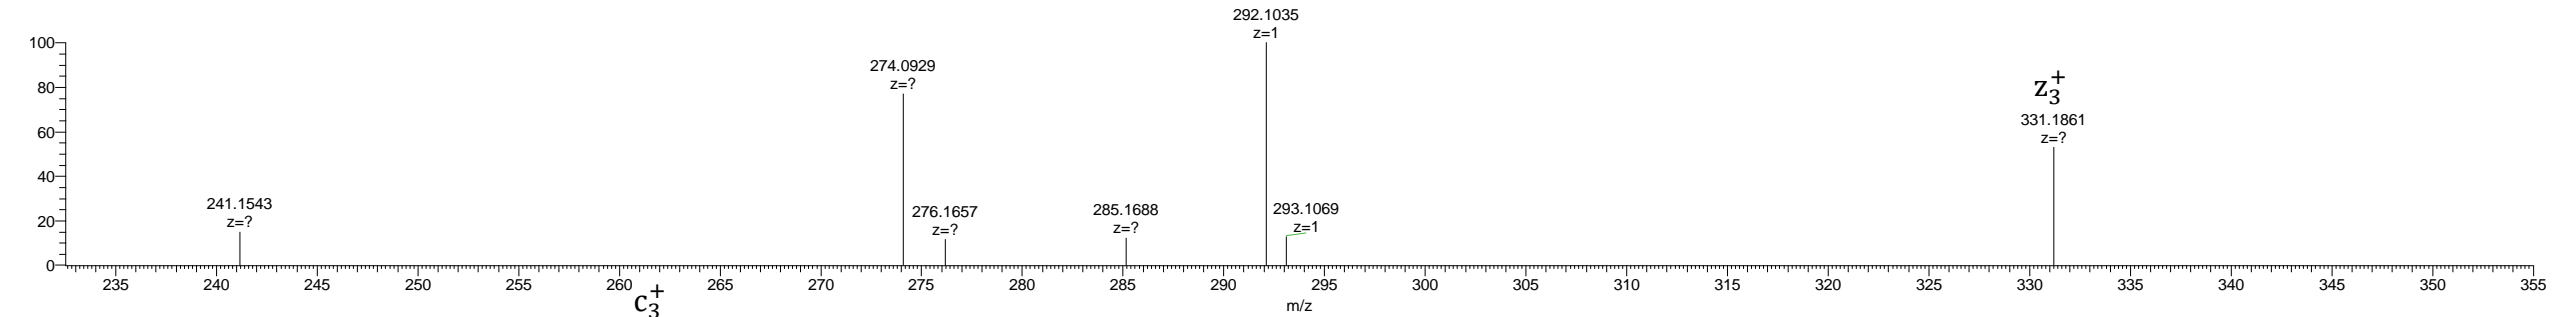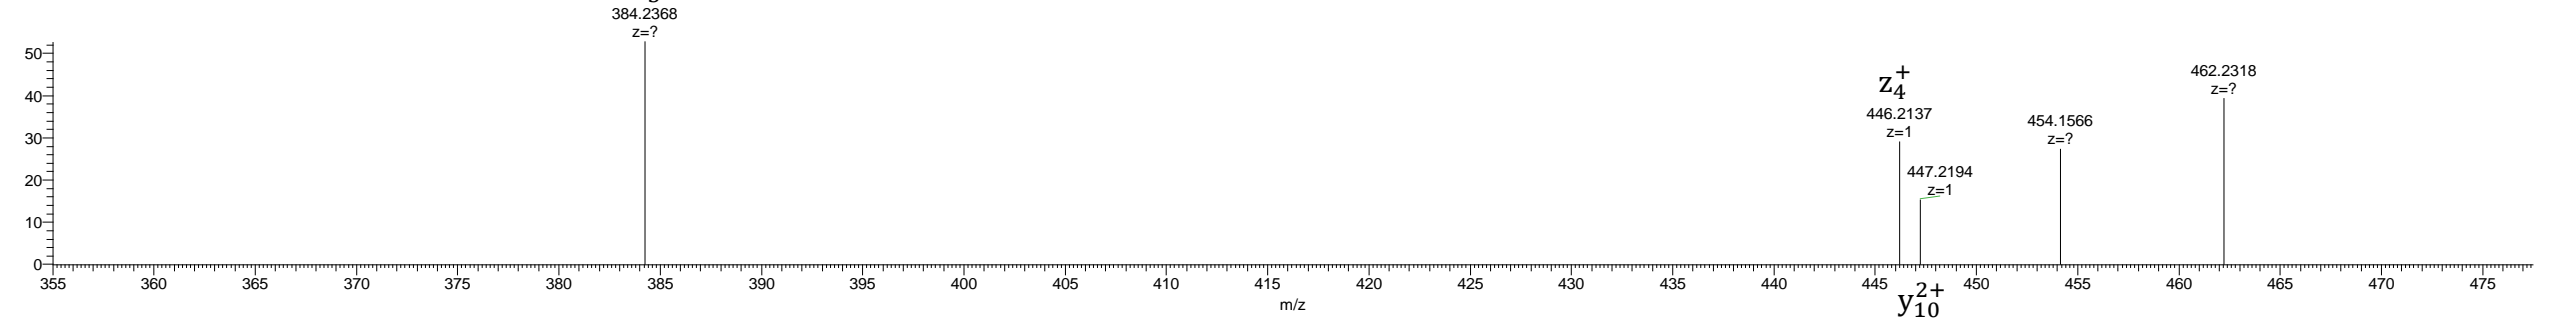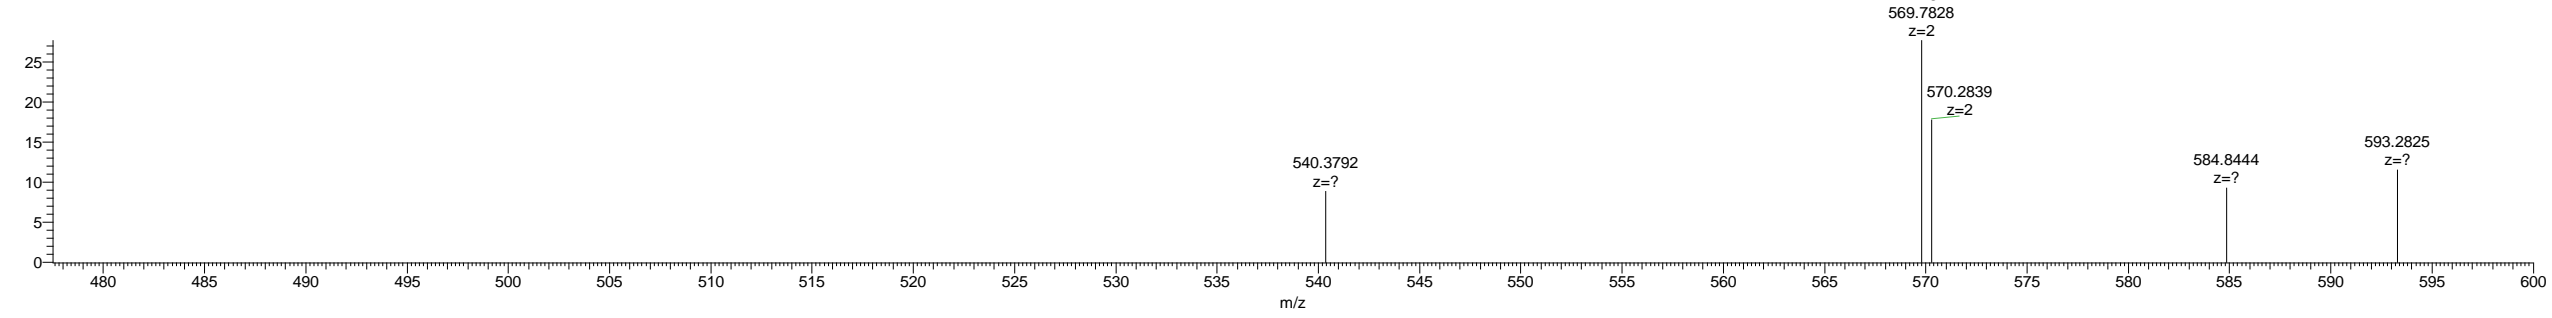

20200930\_rad\_PepMap\_50cm\_Sinai\_Trypsin\_PNGaseF\_ETHcD #25959 RT: 104.86 AV: 1 NL: 2.57E4  
T: FTMS + c NSI d sa Full ms2 1082.0125@etd25.96 1082.0125@hcd15.00 [110.0000-2000.0000]

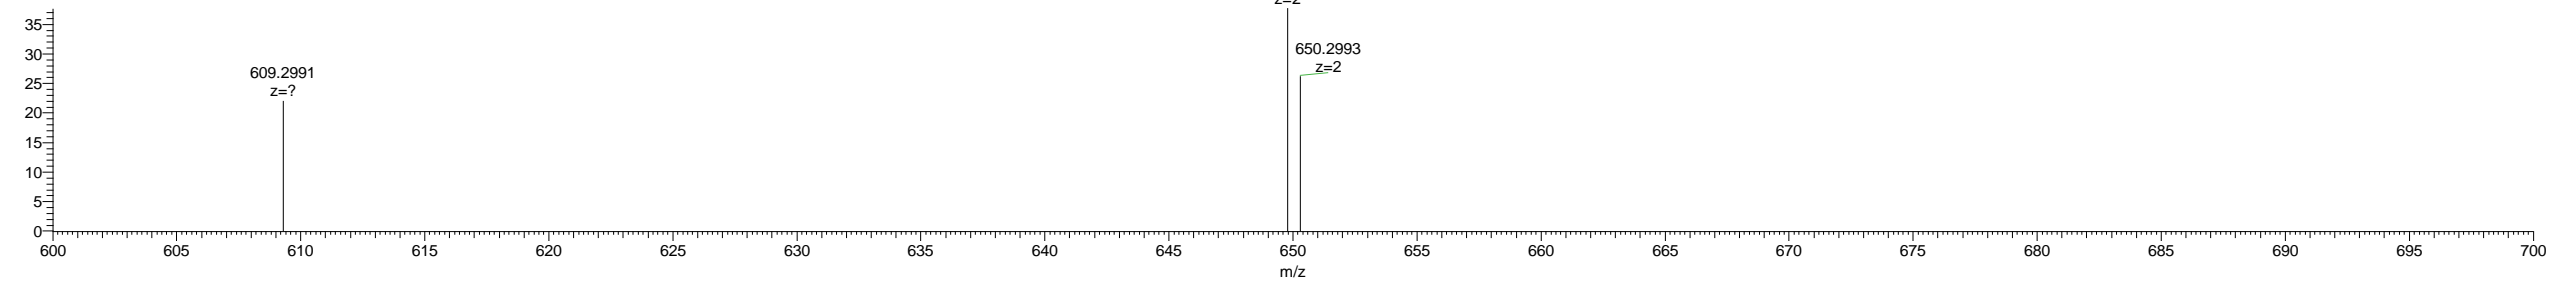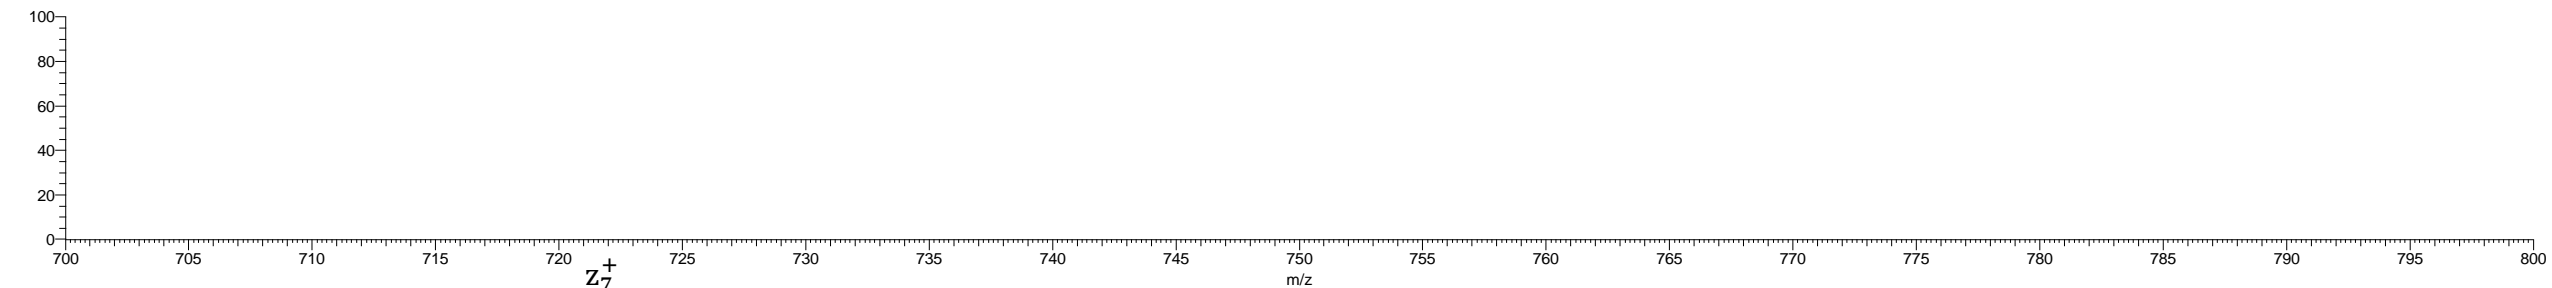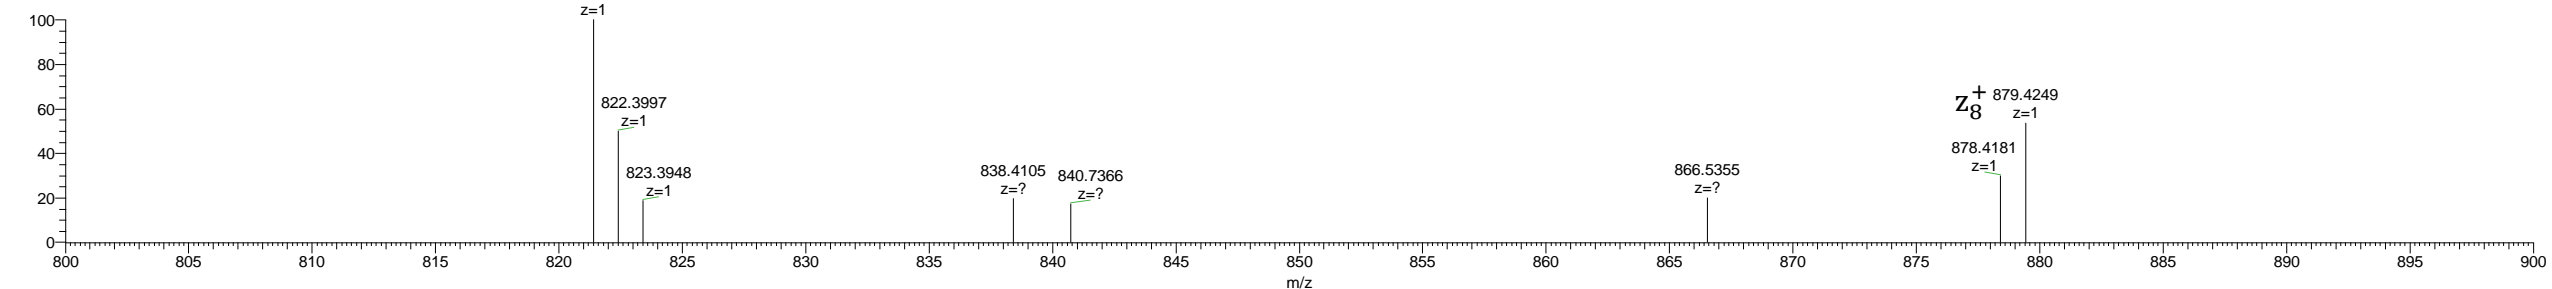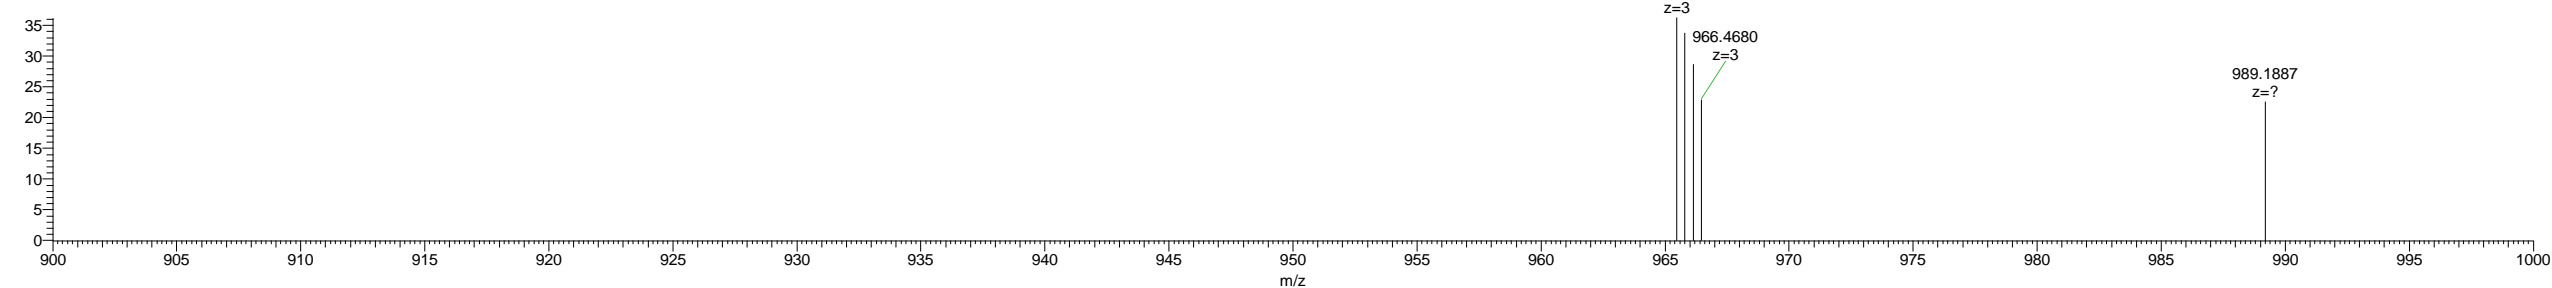

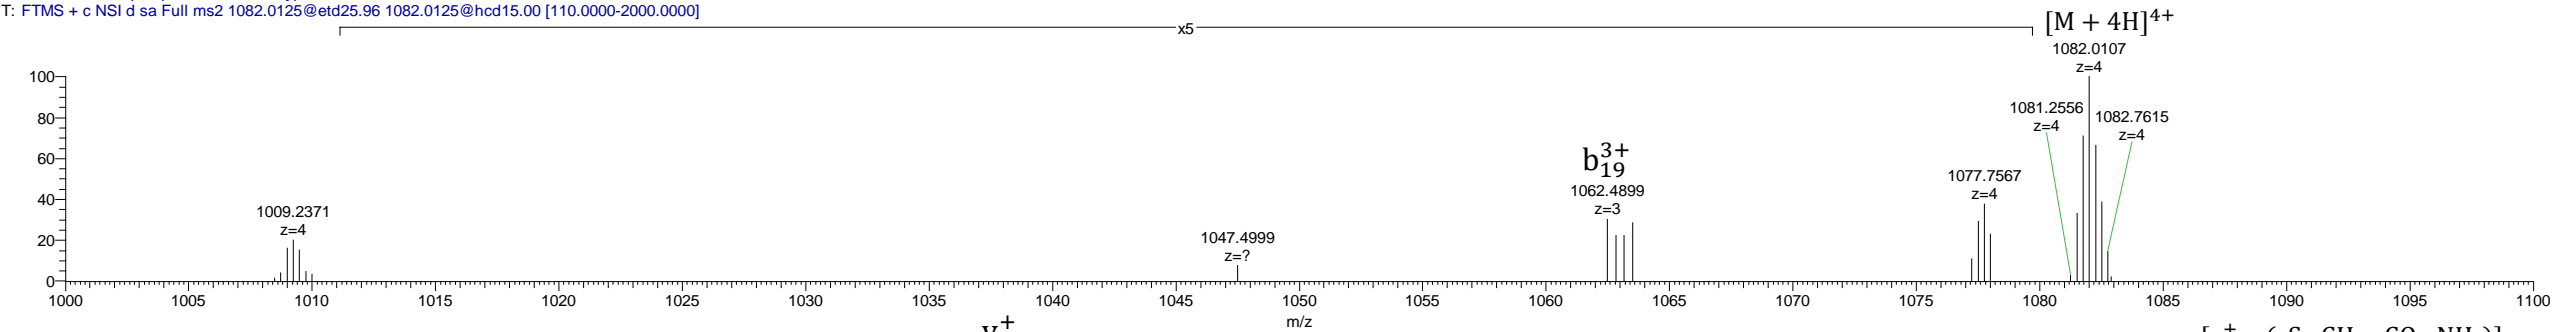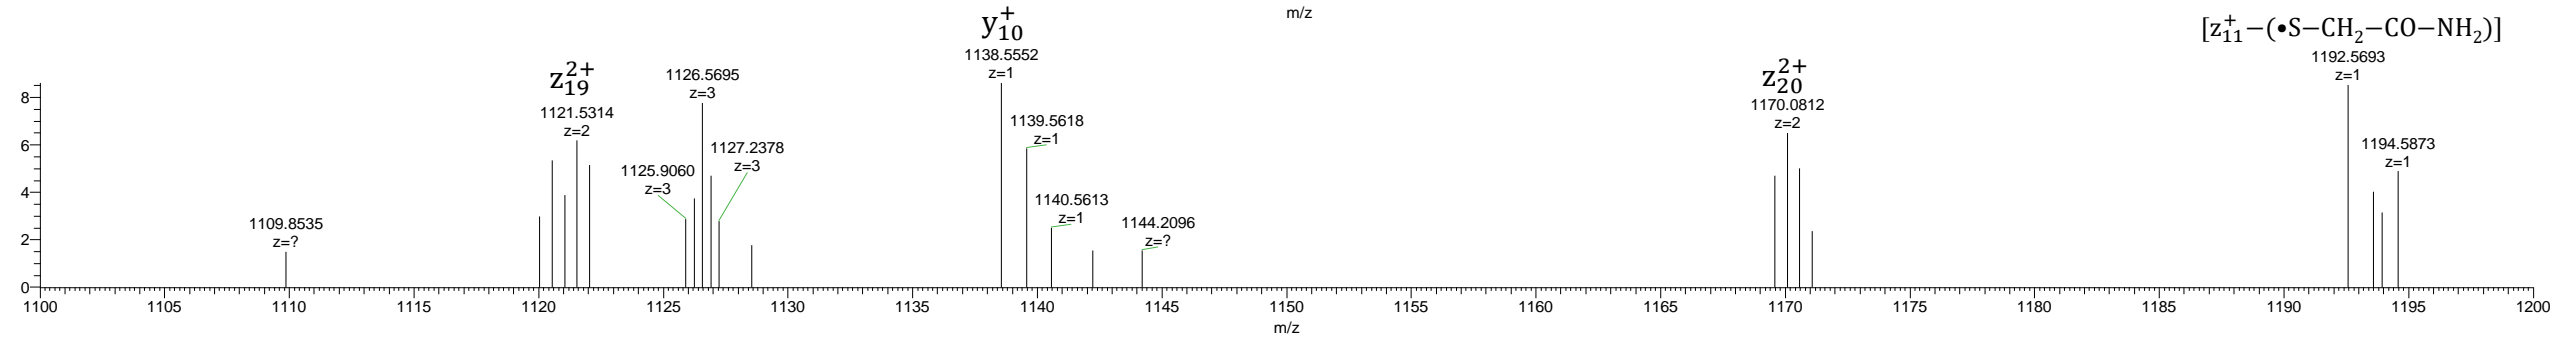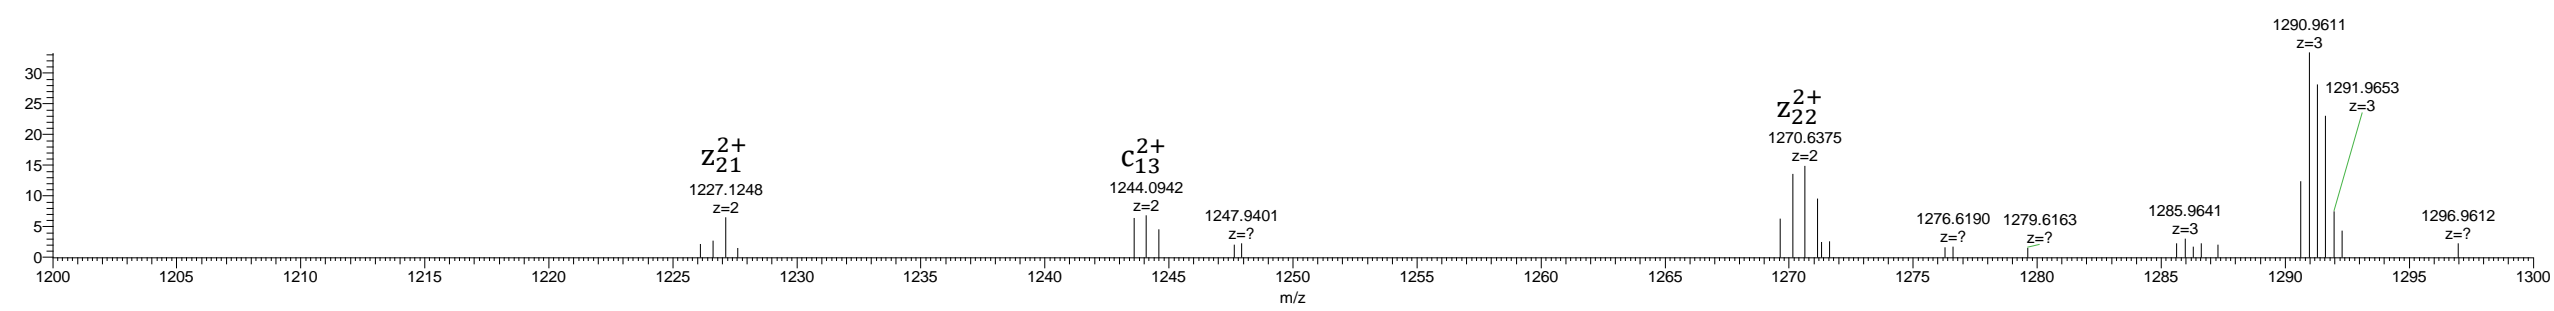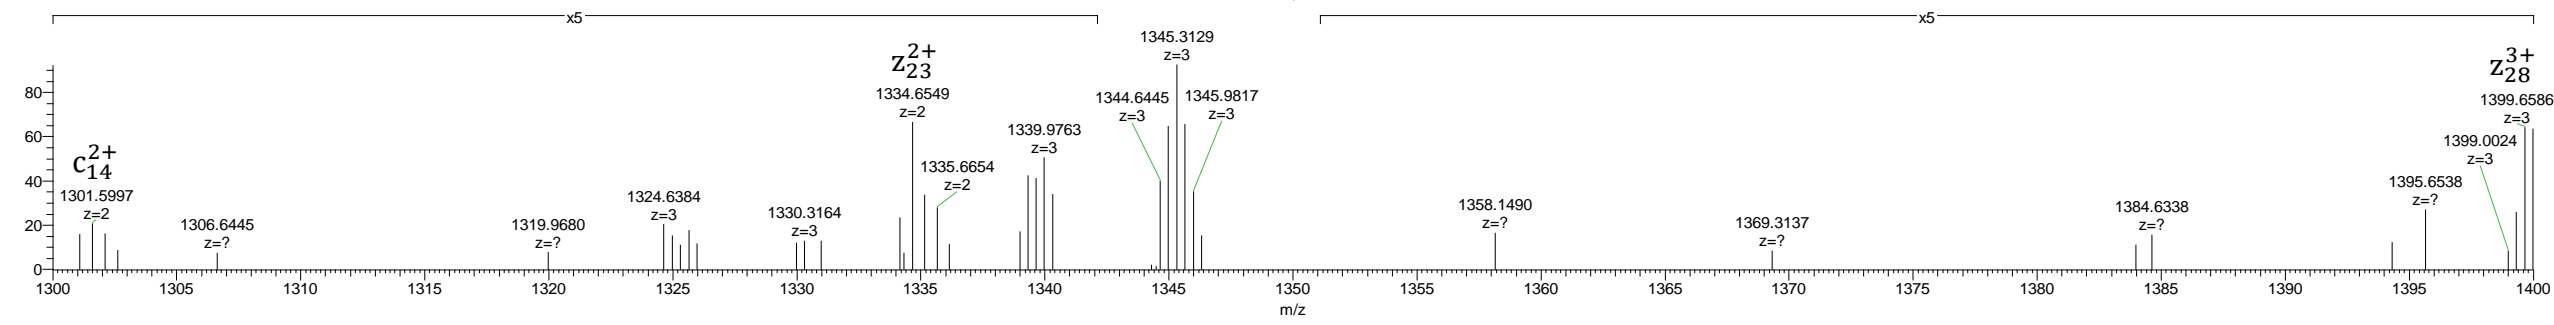

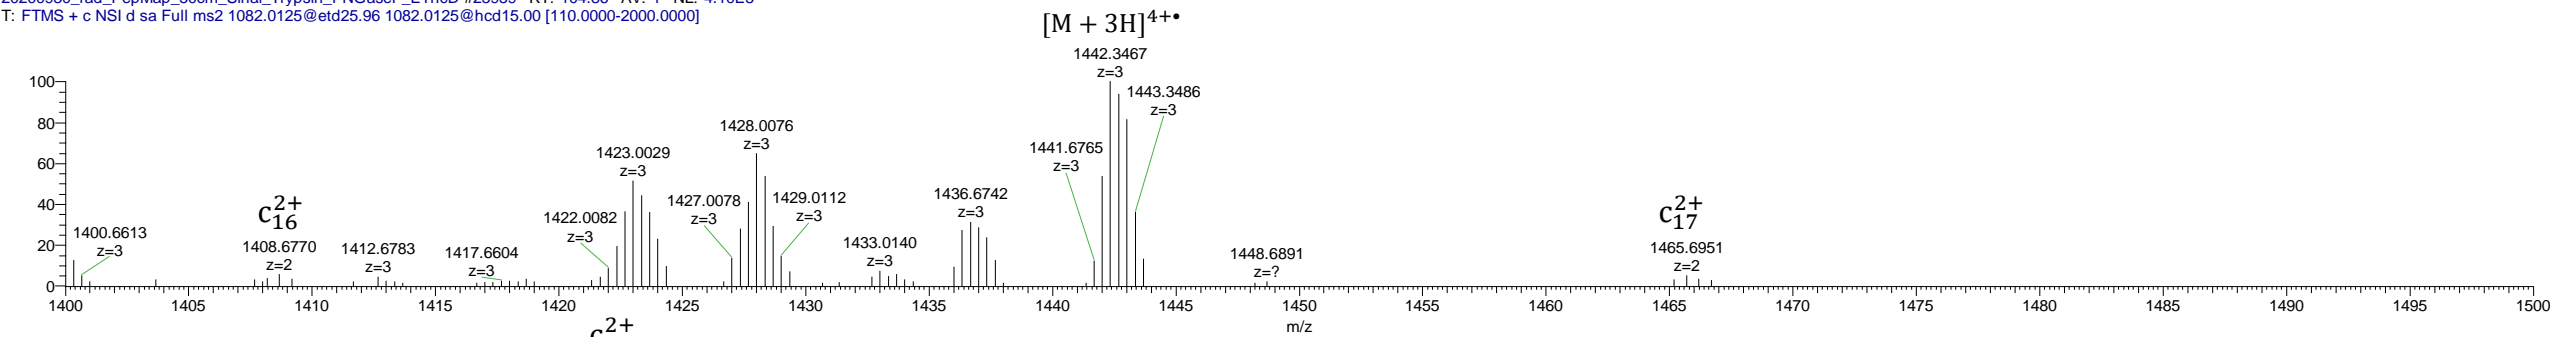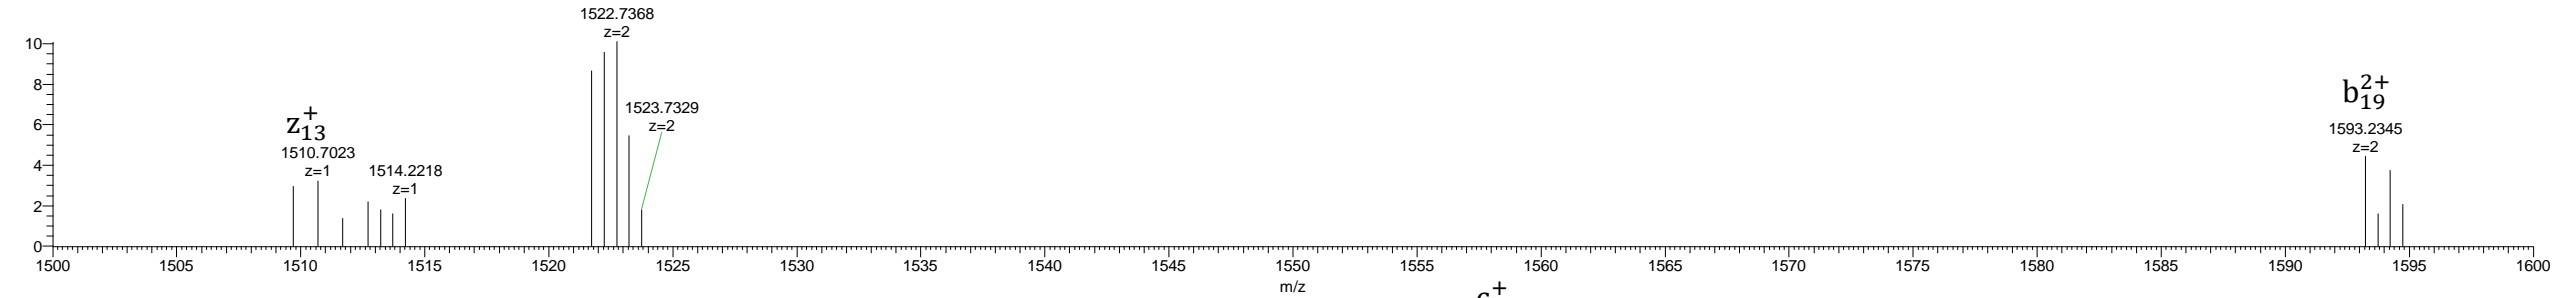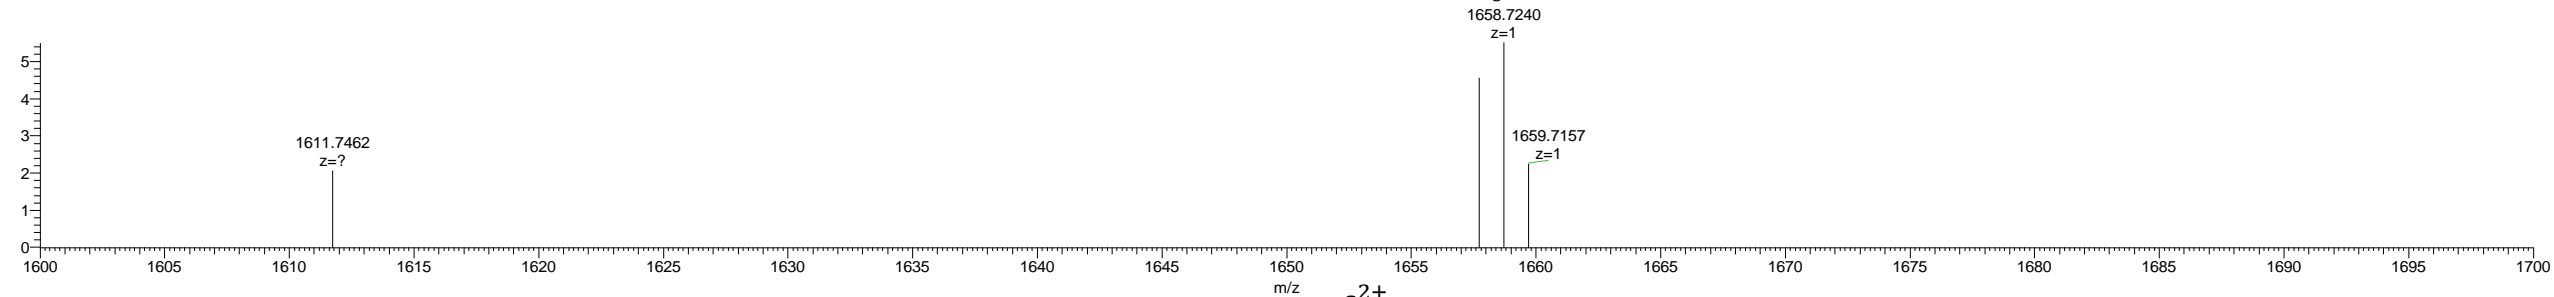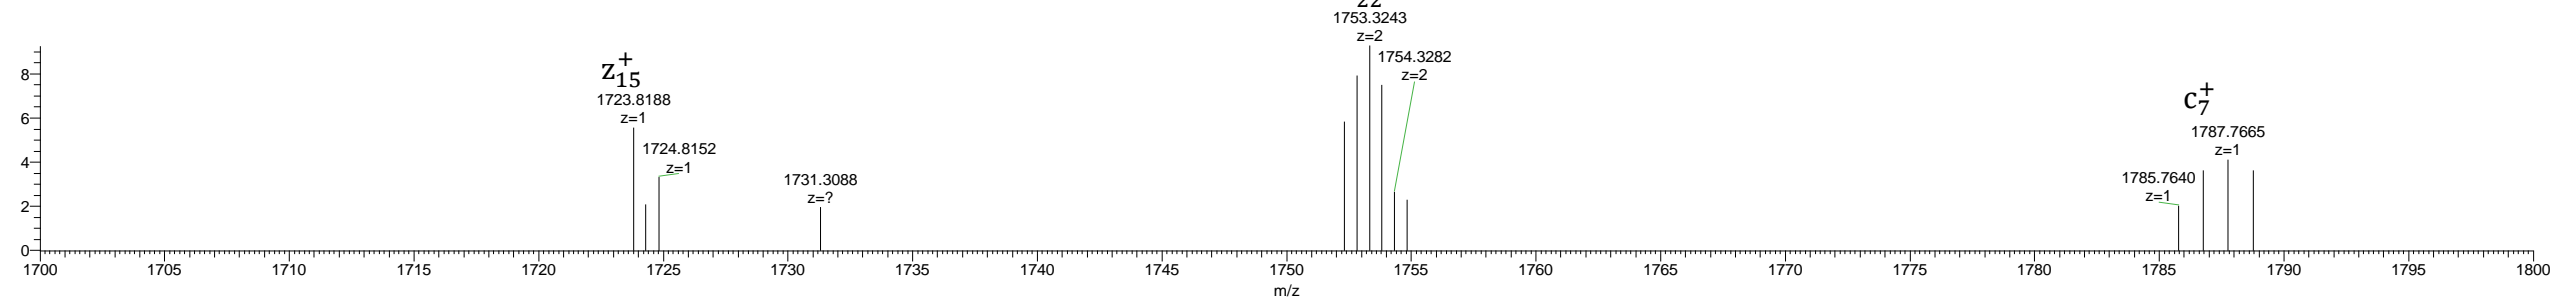

20200930\_rad\_PepMap\_50cm\_Sinai\_Trypsin\_PNGaseF\_EThcD #25959 RT: 104.86 AV: 1 NL: 4.79E4  
T: FTMS + c NSI d sa Full ms2 1082.0125@etd25.96 1082.0125@hcd15.00 [110.0000-2000.0000]

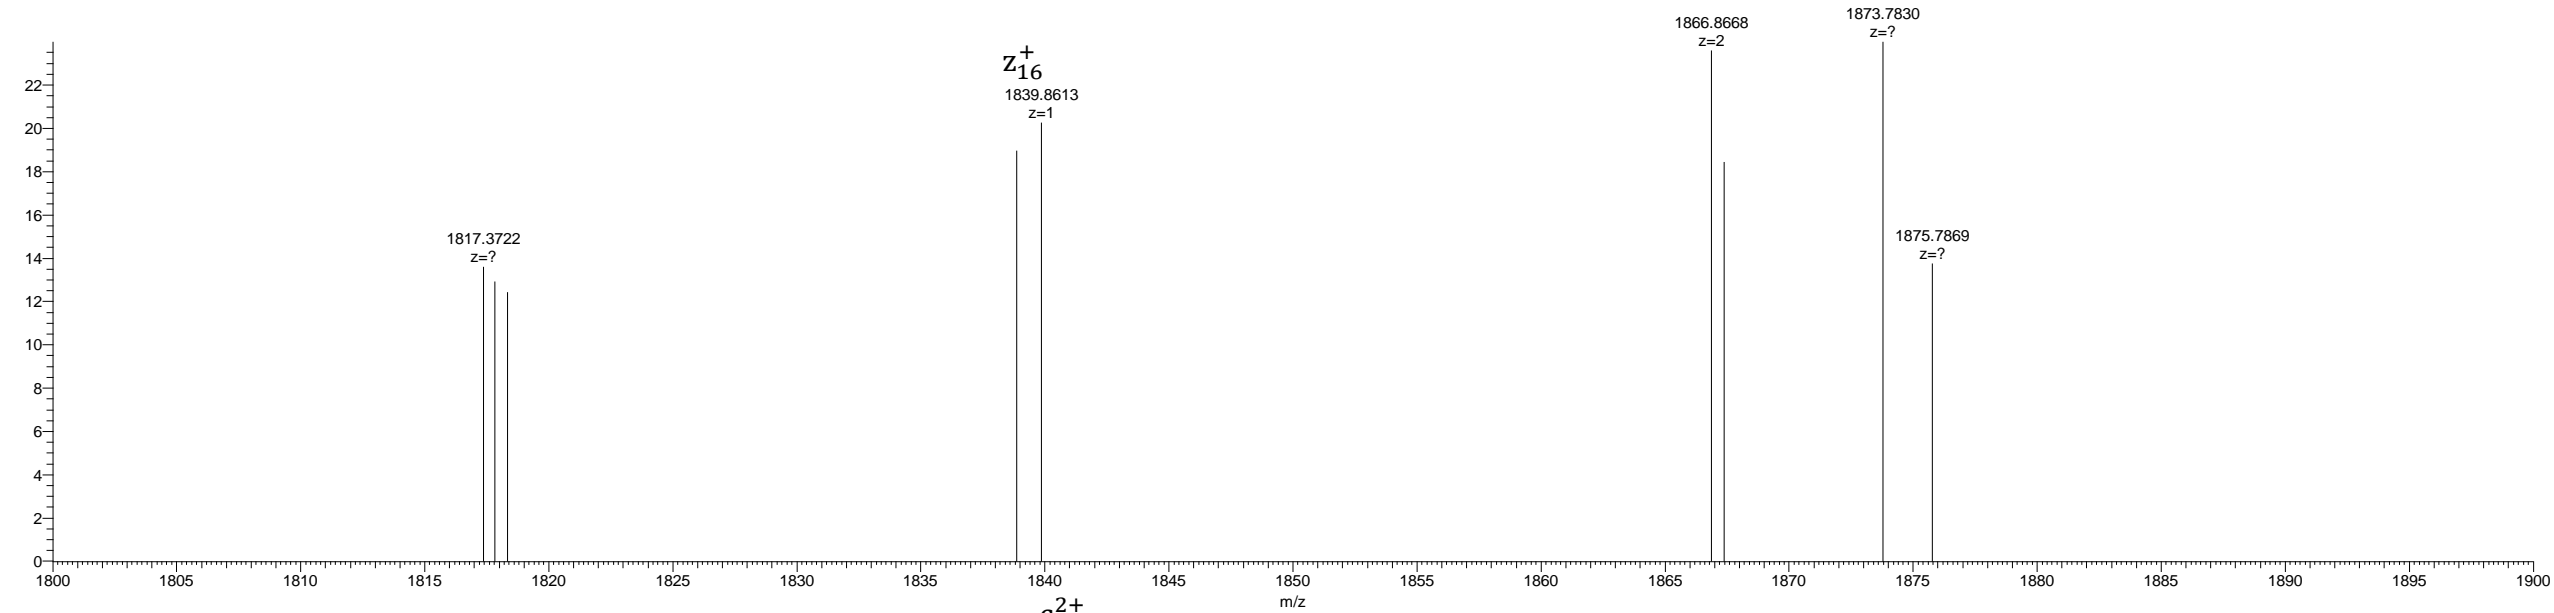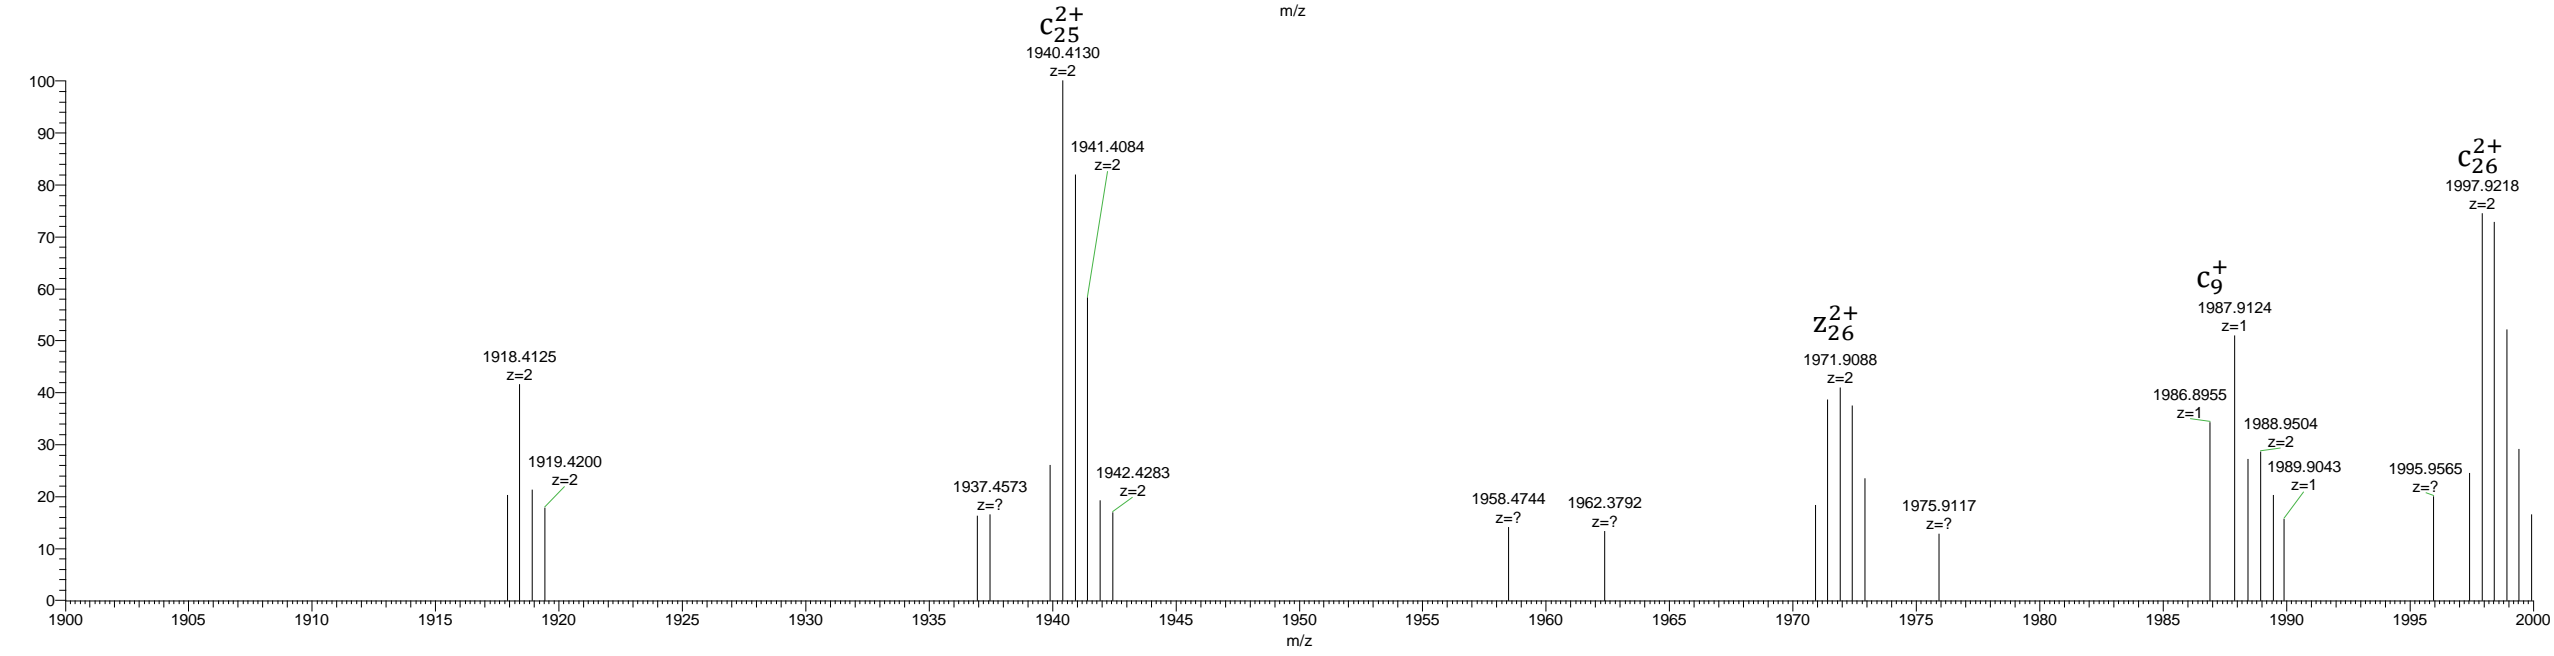

| c4+       | c3+       | c2+       | c+        |    | AA             |    | z•+       | z•2+      | z•3+      | z•4+      |
|-----------|-----------|-----------|-----------|----|----------------|----|-----------|-----------|-----------|-----------|
| 33.0219   | 43.6935   | 65.0366   | 129.0659  | 1  | Q<br>(pyroGlu) | 29 |           |           |           |           |
| 72.0472   | 95.7272   | 143.0871  | 285.1670  | 2  | R              | 28 | 4195.9513 | 2098.4793 | 1399.3219 | 1049.7433 |
| 96.8143   | 128.7500  | 192.6213  | 384.2354  | 3  | V              | 27 | 4039.8502 | 2020.4287 | 1347.2882 | 1010.7180 |
| 128.8289  | 171.4362  | 256.6506  | 512.2940  | 4  | Q              | 26 | 3940.7818 | 1970.8945 | 1314.2654 | 985.9509  |
| 153.0921  | 203.7871  | 305.1770  | 609.3467  | 5  | P              | 25 | 3812.7232 | 1906.8652 | 1271.5792 | 953.9362  |
| 415.1848  | 553.2440  | 829.3623  | 1657.7174 | 6  | T (Glycan)     | 24 | 3715.6704 | 1858.3388 | 1239.2283 | 929.6731  |
| 447.4455  | 596.2582  | 893.8836  | 1786.7600 | 7  | E              | 23 | 2667.2997 | 1334.1535 | 889.7714  | 667.5804  |
| 469.2035  | 625.2689  | 937.3997  | 1873.7921 | 8  | S              | 22 | 2538.2571 | 1269.6322 | 846.7572  | 635.3197  |
| 497.4745  | 662.9636  | 993.9417  | 1986.8761 | 9  | I              | 21 | 2451.2251 | 1226.1162 | 817.7465  | 613.5617  |
| 522.2416  | 695.9864  | 1043.4759 | 2085.9445 | 10 | V              | 20 | 2338.1410 | 1169.5741 | 780.0519  | 585.2907  |
| 561.2669  | 748.0201  | 1121.5265 | 2242.0456 | 11 | R              | 19 | 2239.0726 | 1120.0399 | 747.0290  | 560.5236  |
| 598.0340  | 797.0429  | 1195.0607 | 2389.1141 | 12 | F              | 18 | 2082.9715 | 1041.9894 | 694.9953  | 521.4983  |
| 622.2972  | 829.3938  | 1243.5870 | 2486.1668 | 13 | P              | 17 | 1935.9031 | 968.4552  | 645.9725  | 484.7312  |
| 651.0539  | 867.7361  | 1301.1005 | 2601.1937 | 14 | N (deam)       | 16 | 1838.8503 | 919.9288  | 613.6216  | 460.4680  |
| 679.3249  | 905.4308  | 1357.6425 | 2714.2778 | 15 | I              | 15 | 1723.8234 | 862.4153  | 575.2793  | 431.7113  |
| 704.5868  | 939.1133  | 1408.1664 | 2815.3255 | 16 | T              | 14 | 1610.7393 | 805.8733  | 537.5846  | 403.4403  |
| 733.0976  | 977.1277  | 1465.1878 | 2929.3684 | 17 | N              | 13 | 1509.6917 | 755.3495  | 503.9021  | 378.1784  |
| 761.3686  | 1014.8223 | 1521.7299 | 3042.4525 | 18 | L              | 12 | 1395.6487 | 698.3280  | 465.8878  | 349.6676  |
| 801.3762  | 1068.1659 | 1601.7452 | 3202.4831 | 19 | C              | 11 | 1282.5647 | 641.7860  | 428.1931  | 321.3966  |
| 825.6394  | 1100.5168 | 1650.2716 | 3299.5359 | 20 | P              | 10 | 1122.5340 | 561.7706  | 374.8495  | 281.3890  |
| 862.4065  | 1149.5396 | 1723.8058 | 3446.6043 | 21 | F              | 9  | 1025.4812 | 513.2443  | 342.4986  | 257.1258  |
| 876.6619  | 1168.5468 | 1752.3165 | 3503.6258 | 22 | G              | 8  | 878.4128  | 439.7101  | 293.4758  | 220.3587  |
| 908.9225  | 1211.5610 | 1816.8378 | 3632.6684 | 23 | E              | 7  | 821.3914  | 411.1993  | 274.4686  | 206.1033  |
| 933.6896  | 1244.5838 | 1866.3720 | 3731.7368 | 24 | V              | 6  | 692.3488  | 346.6780  | 231.4544  | 173.8426  |
| 970.4567  | 1293.6066 | 1939.9062 | 3878.8052 | 25 | F              | 5  | 593.2804  | 297.1438  | 198.4316  | 149.0755  |
| 999.2135  | 1331.9489 | 1997.4197 | 3993.8321 | 26 | N (deam)       | 4  | 446.2119  | 223.6096  | 149.4088  | 112.3084  |
| 1016.9728 | 1355.6279 | 2032.9383 | 4064.8692 | 27 | A              | 3  | 331.1850  | 166.0961  | 111.0665  | 83.5517   |
| 1042.2347 | 1389.3105 | 2083.4621 | 4165.9169 | 28 | T              | 2  | 260.1479  | 130.5776  | 87.3875   | 65.7924   |
|           |           |           |           | 29 | R              | 1  | 159.1002  | 80.0537   | 53.7049   | 40.5305   |

$$\begin{array}{r}
z_{11} : \quad 1282.5647 \\
- \quad 90.0014 \quad (\bullet\text{S-CH}_2\text{-CO-NH}_2) \\
\hline
1192.5633
\end{array}$$

SRVQPTESIVRFPNITNLCPFGEVFNATR  
EThcD

20200930\_rad\_PepMap\_50cm\_Ragon\_Trypsin\_PNGaseF\_EThcD #29413 RT: 95.61 AV: 1 NL: 2.02E5  
T: FTMS + c NSI d sa Full ms2 861.2101@etd16.61 861.2101@hcd15.00 [110.0000-2000.0000]

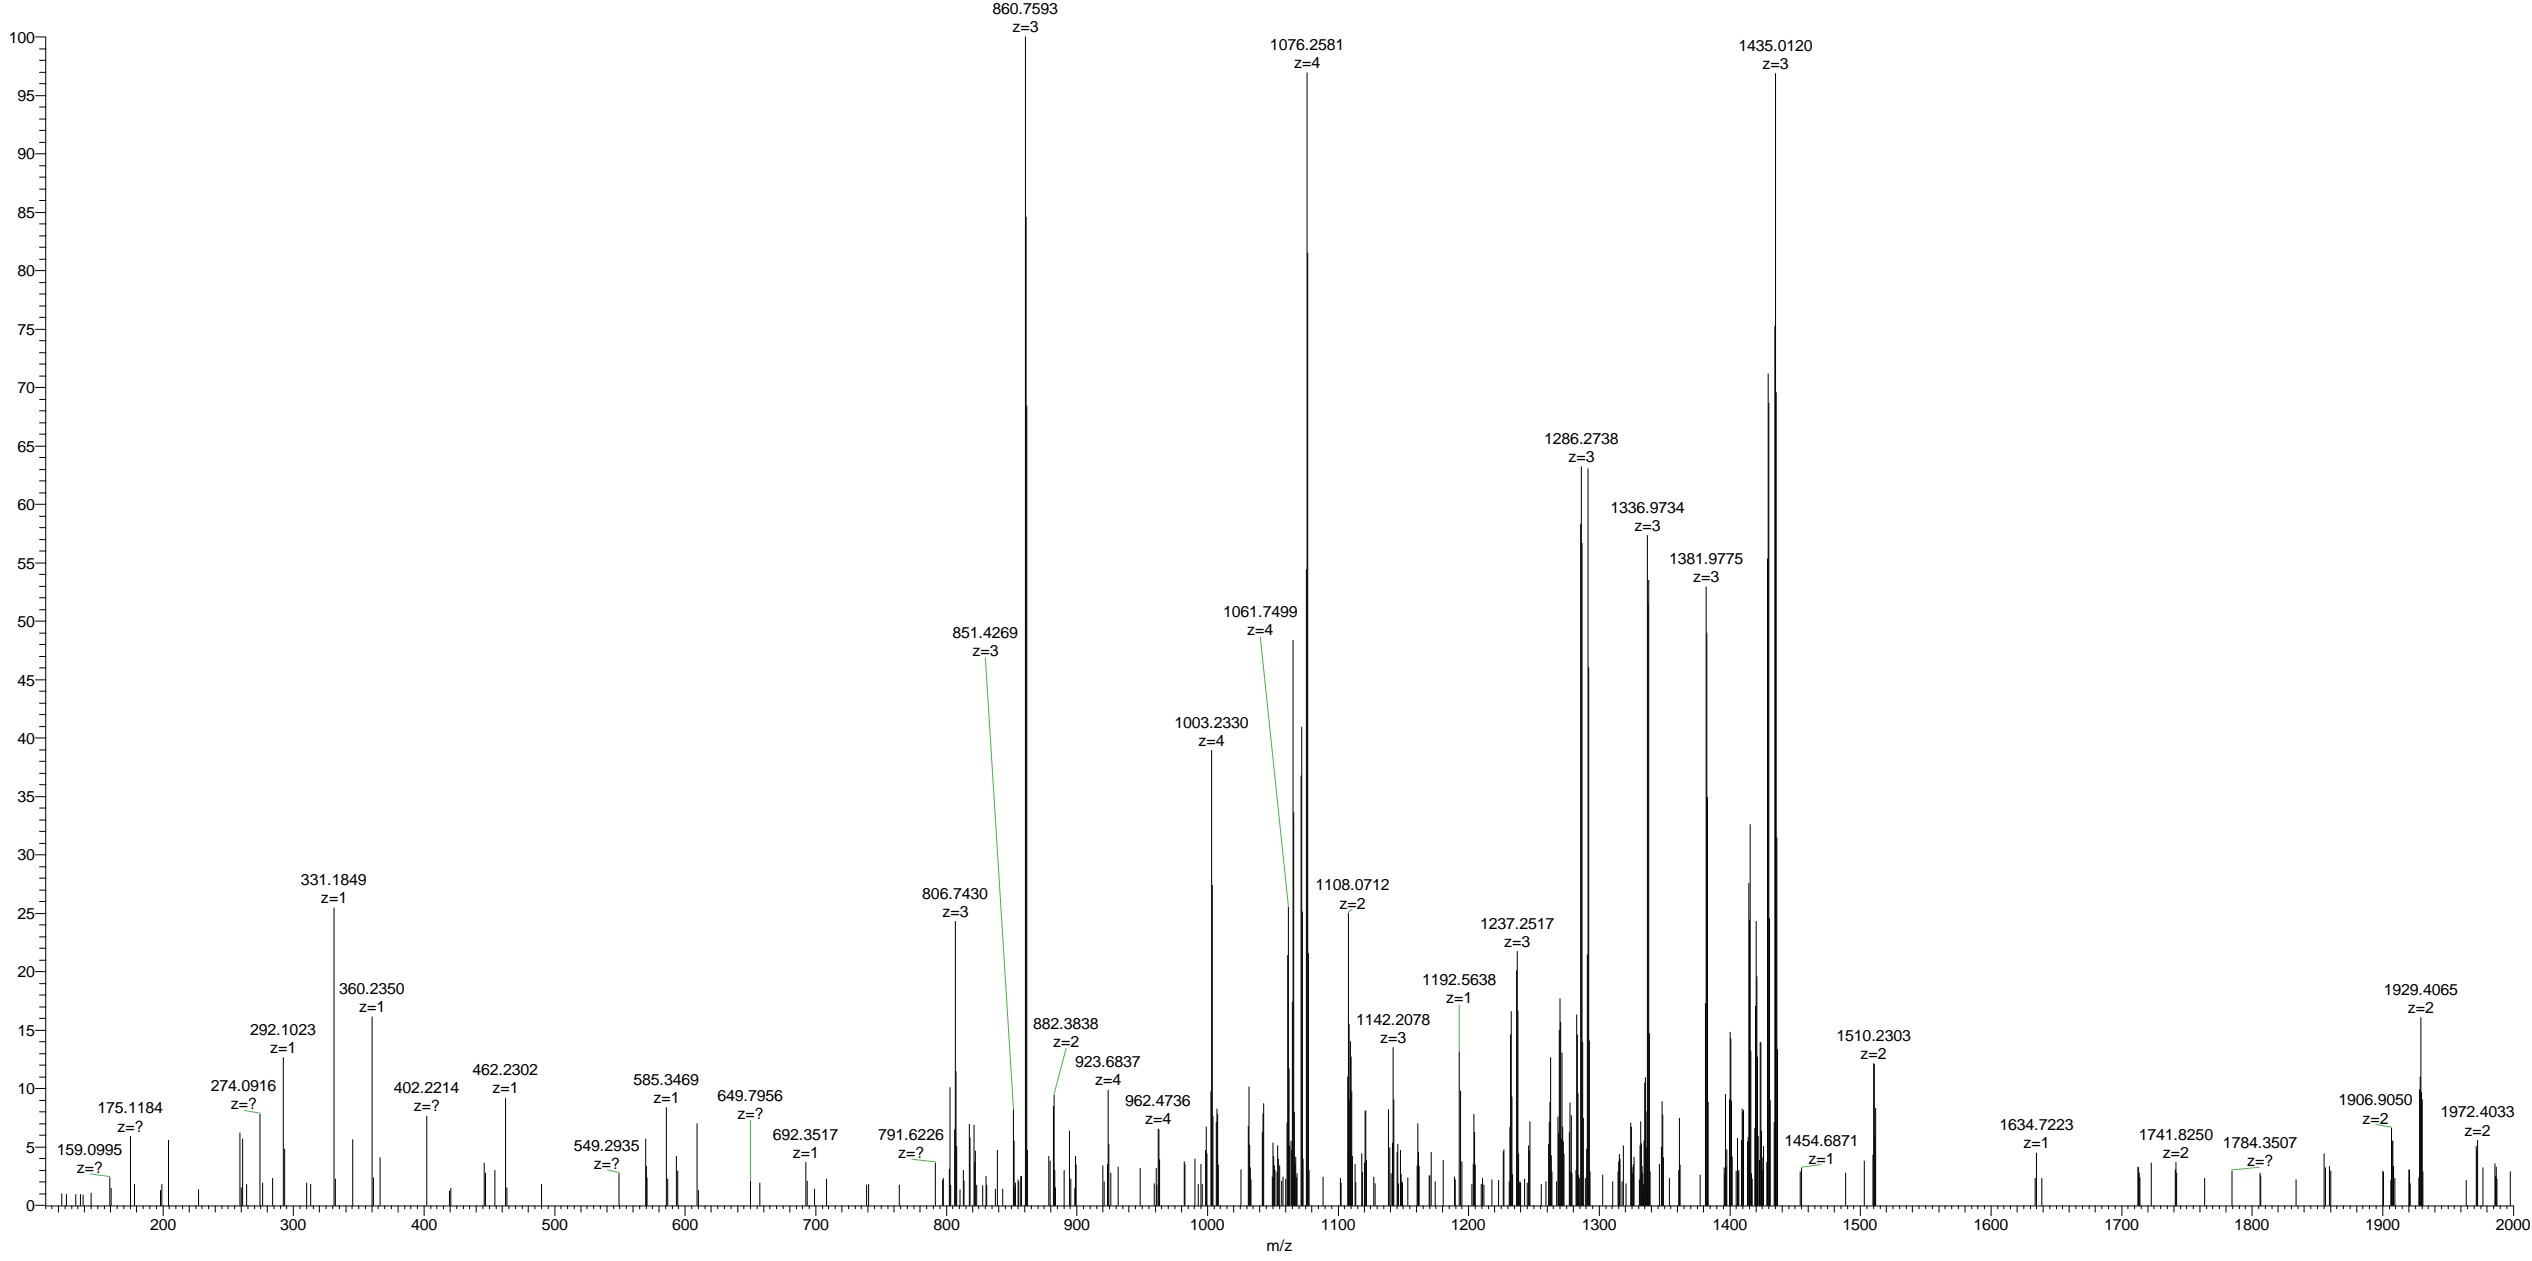



20200930\_rad\_PepMap\_50cm\_Ragon\_Trypsin\_PNGaseF\_ETHcD #29413 RT: 95.61 AV: 1 NL: 5.15E4  
T: FTMS + c NSI ds Full ms2 861.2101@etd16.61 861.2101@hcd15.00 [110.0000-2000.0000]

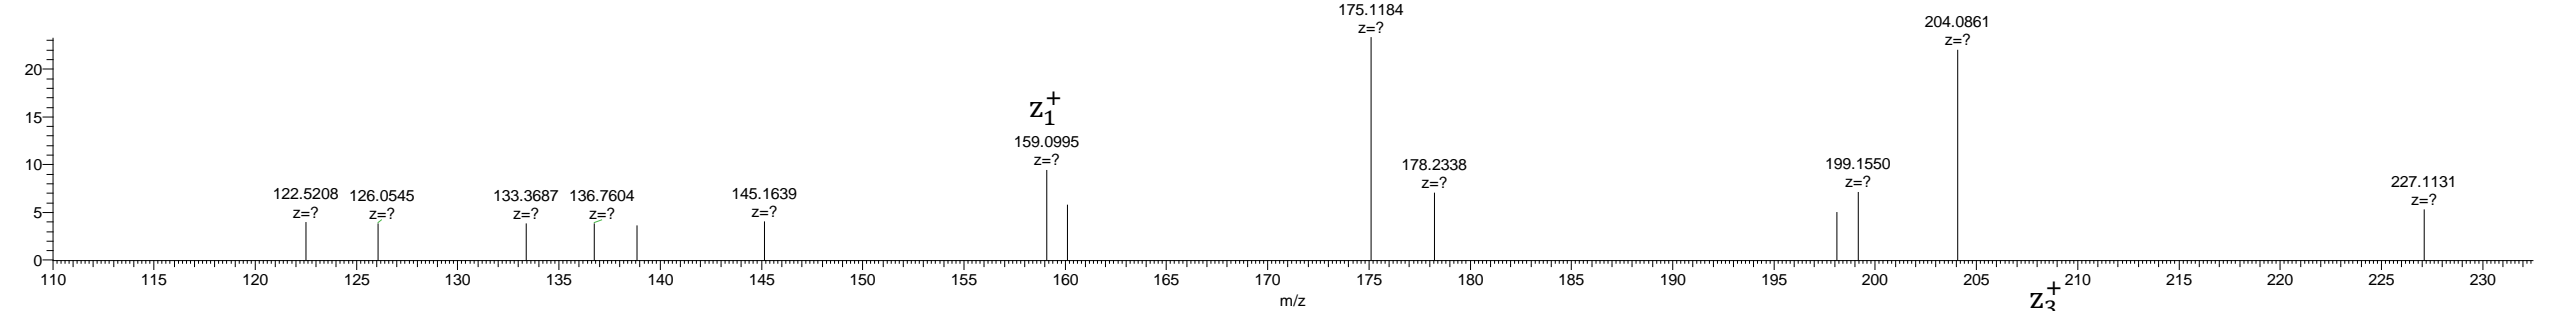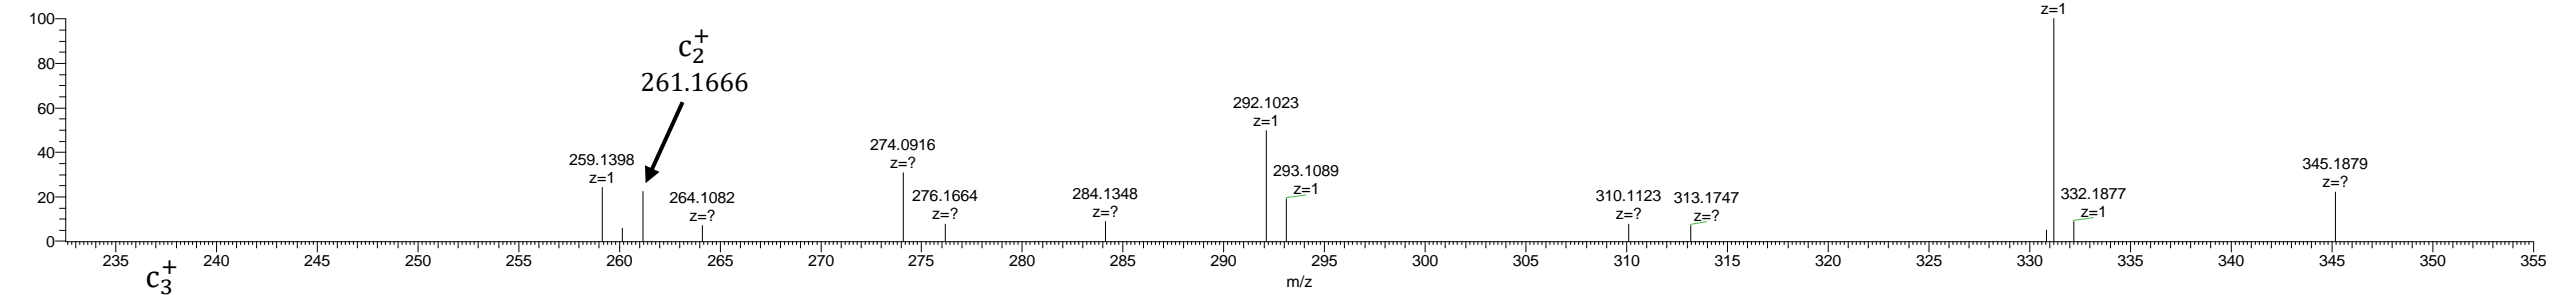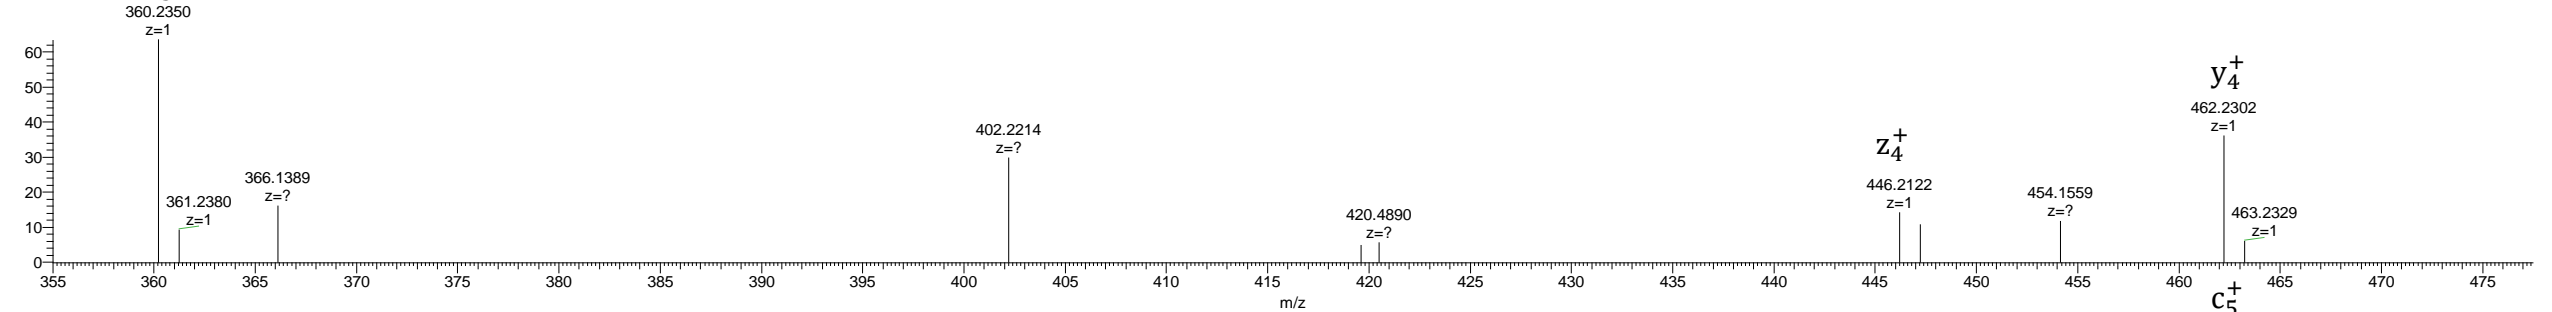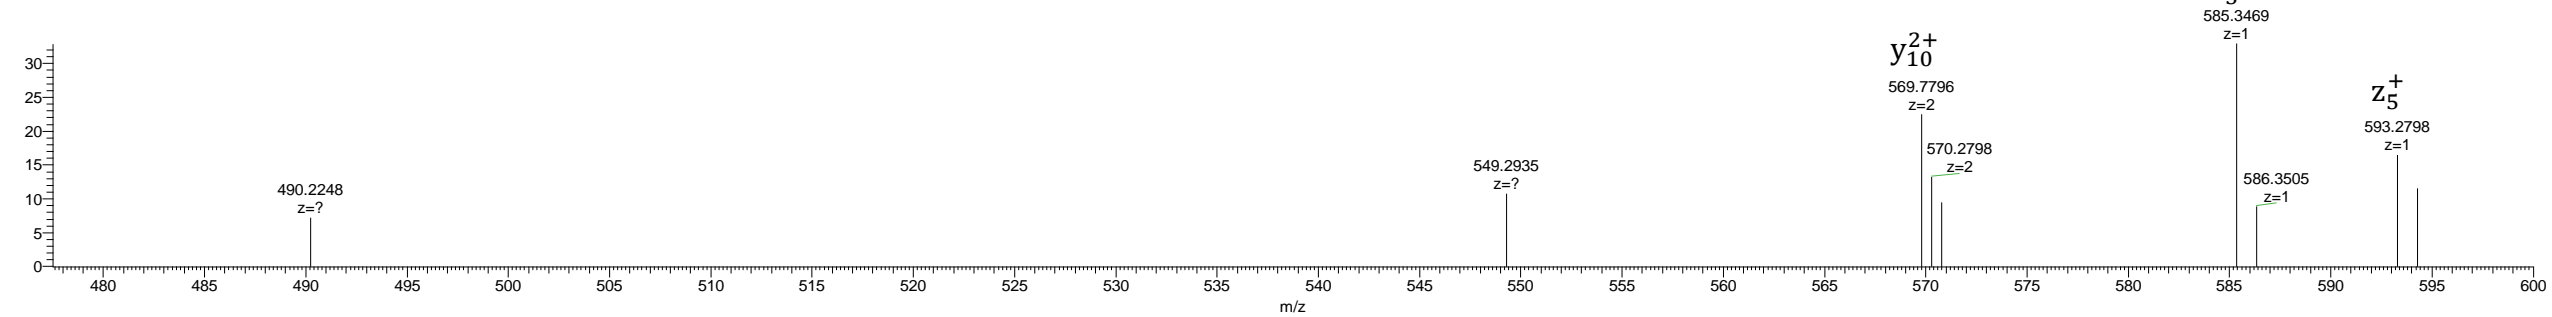

20200930\_rad\_PepMap\_50cm\_Ragon\_Trypsin\_PNGaseF\_ETHcD #29413 RT: 95.61 AV: 1 NL: 2.02E5  
T: FTMS + c NSI d sa Full ms2 861.2101@etd16.61 861.2101@hcd15.00 [110.0000-2000.0000]

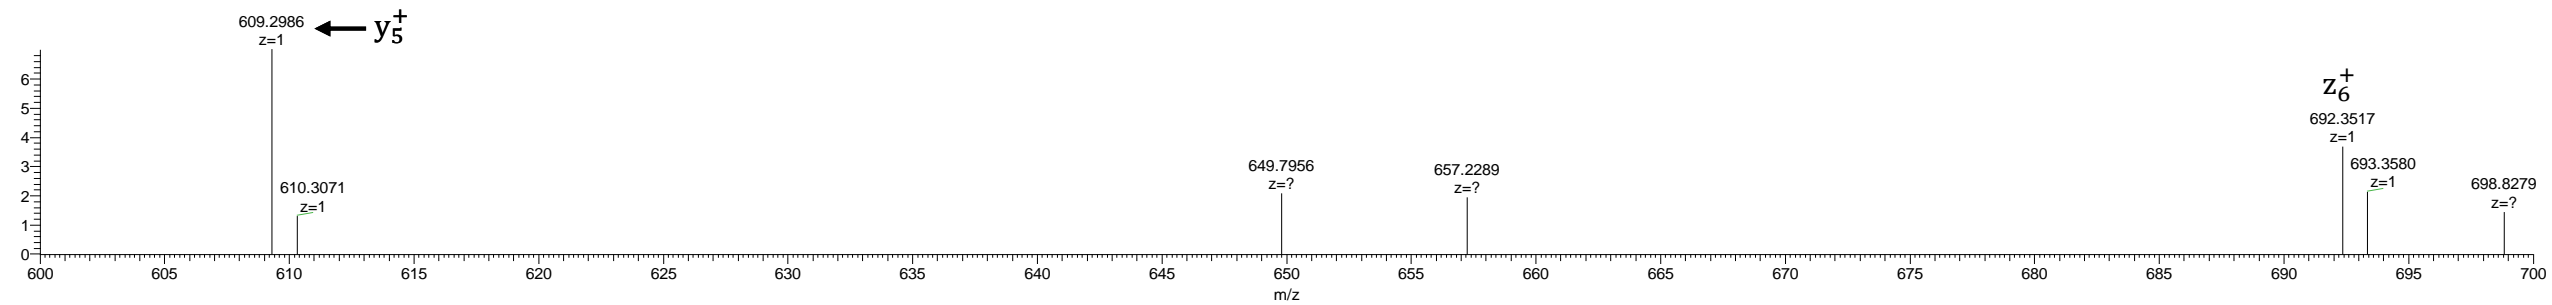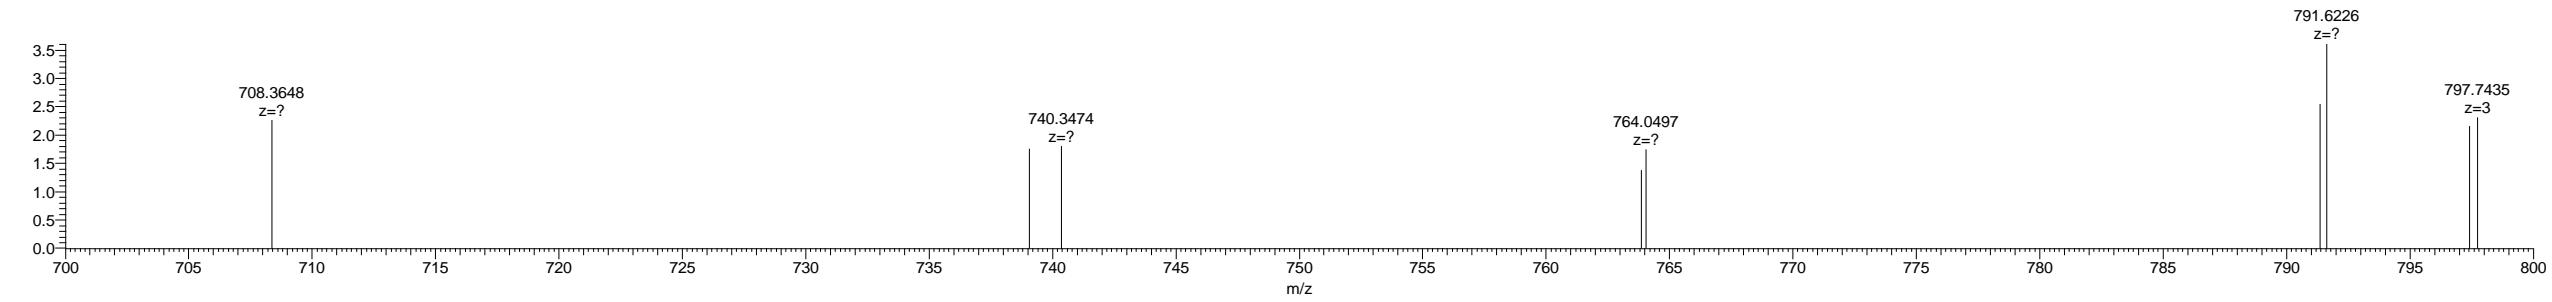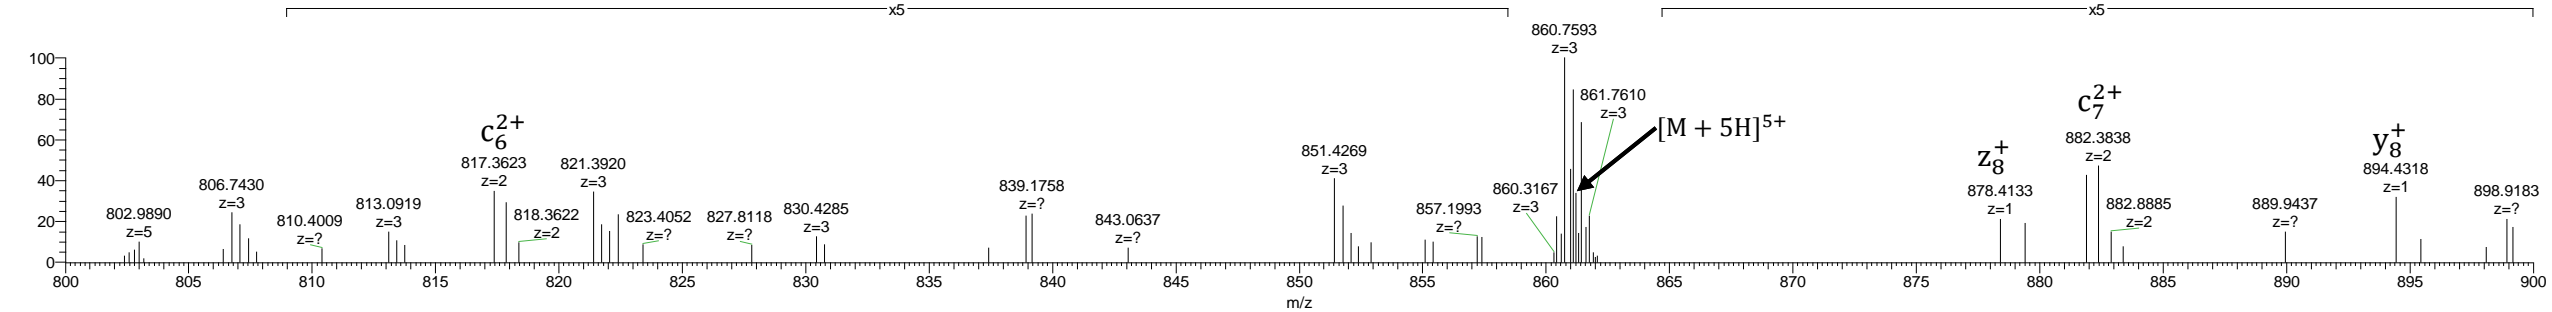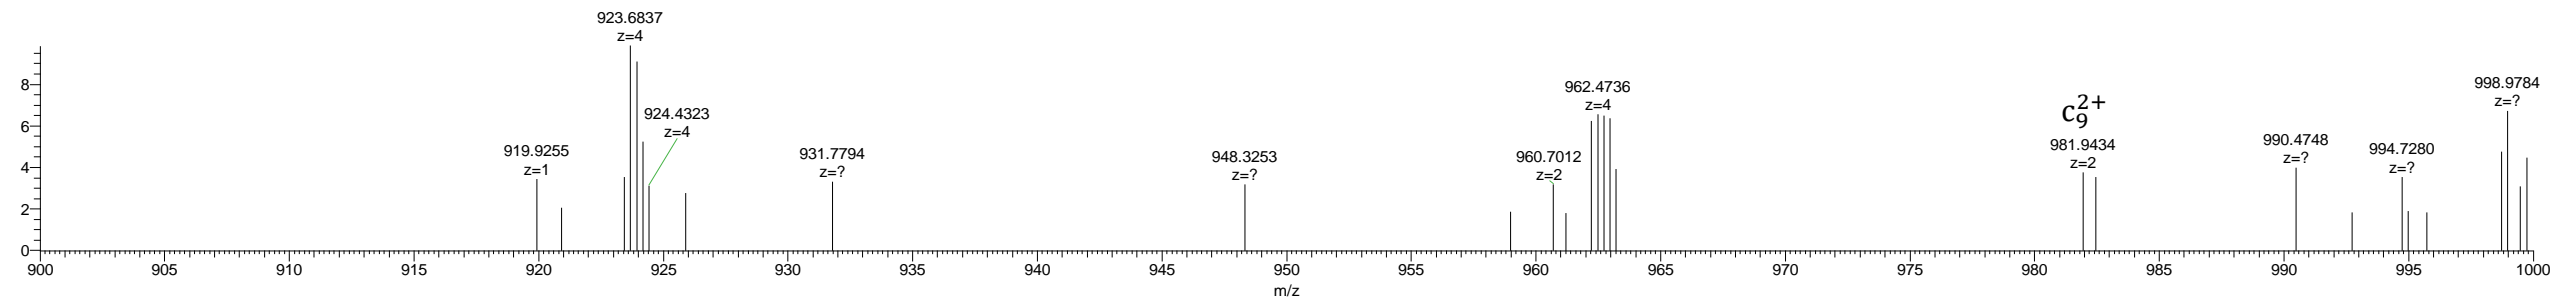

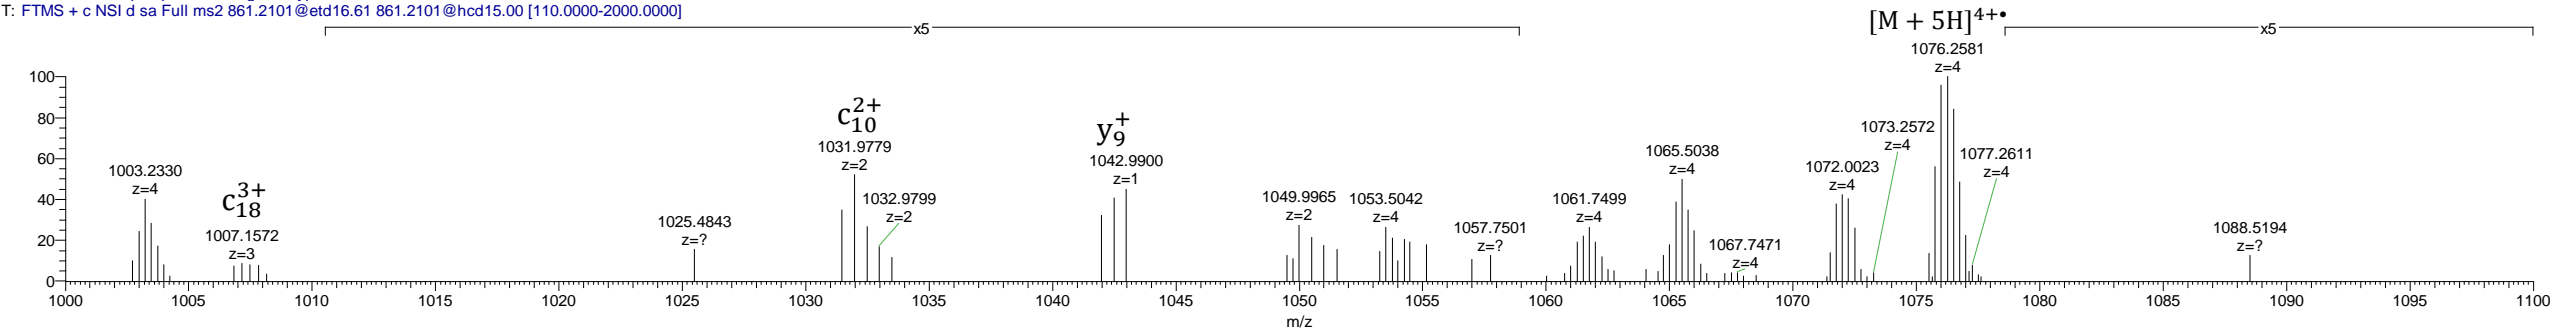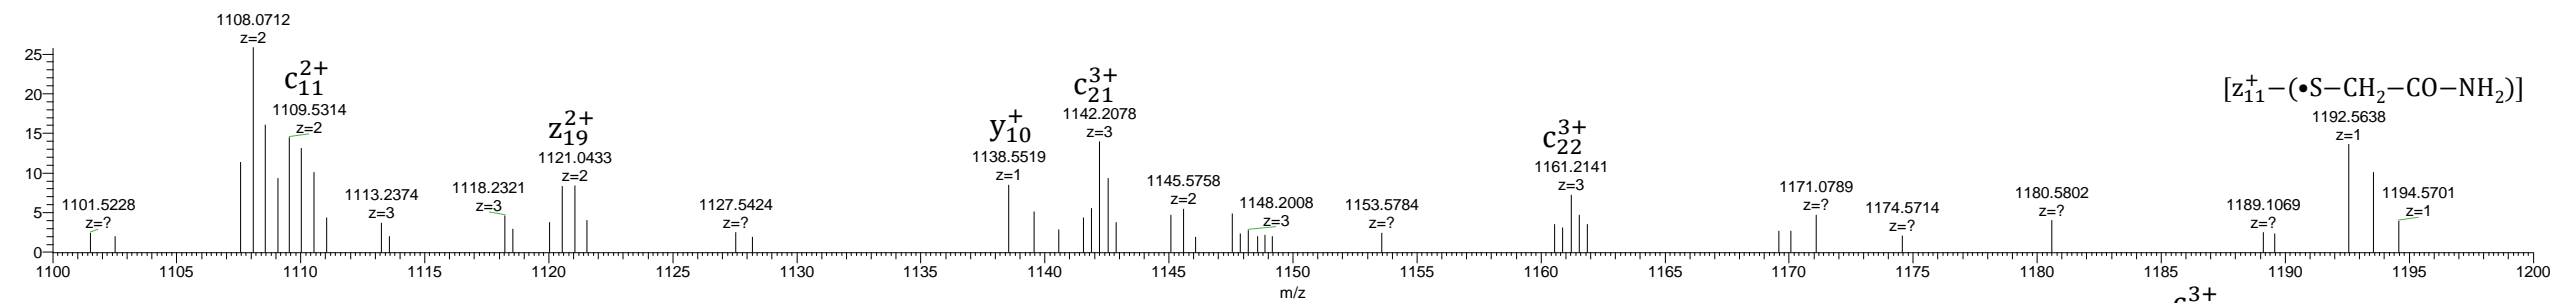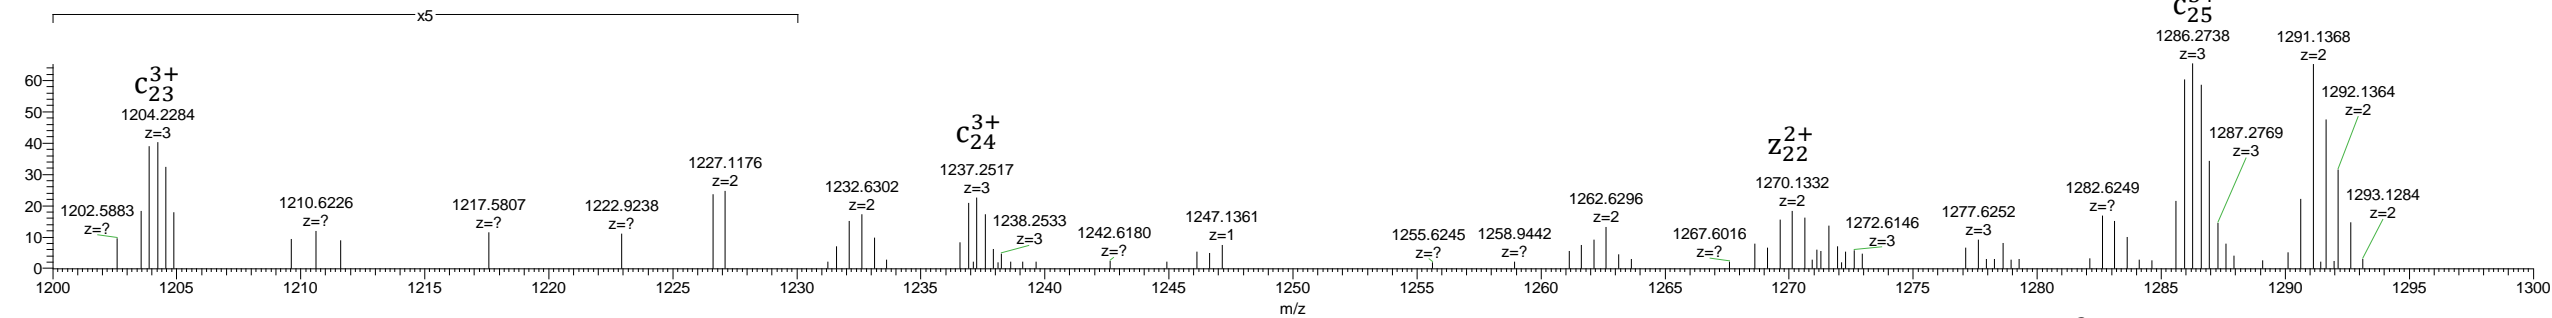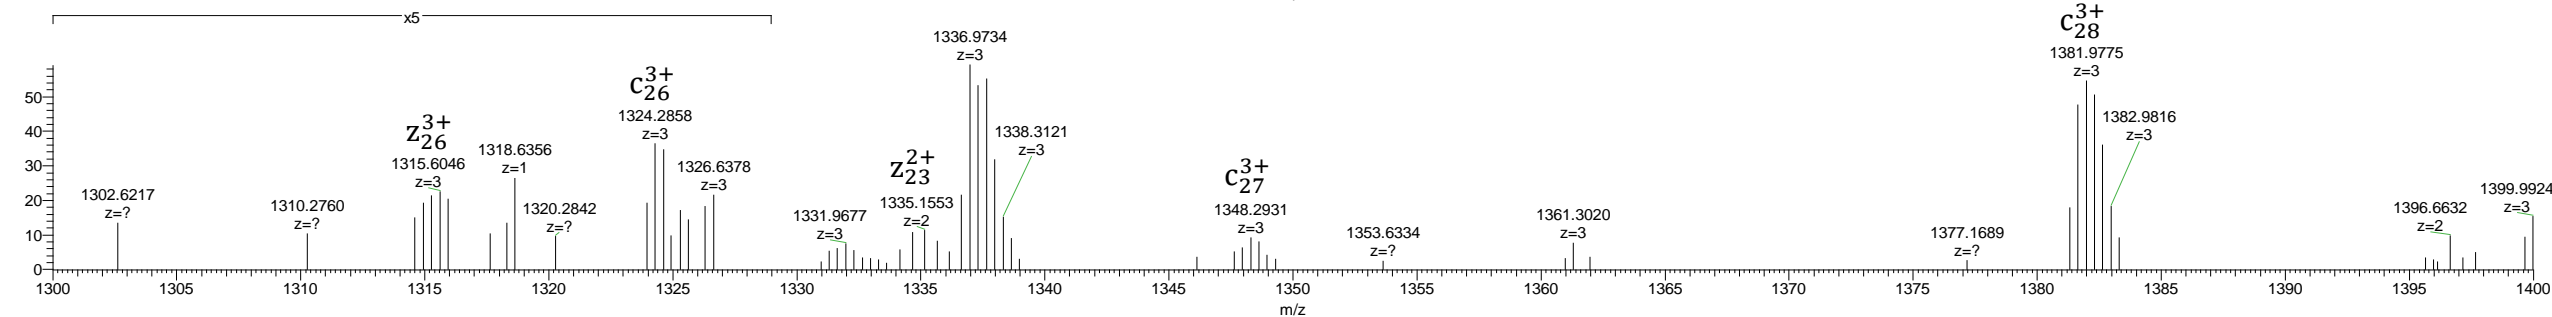

20200930\_rad\_PepMap\_50cm\_Ragon\_Trypsin\_PNGaseF\_ETHcD #29413 RT: 95.61 AV: 1 NL: 1.96E5  
T: FTMS + c NSI d sa Full ms2 861.2101@etd16.61 861.2101@hcd15.00 [110.0000-2000.0000]

$[M + 5H]^{3+}$

x5

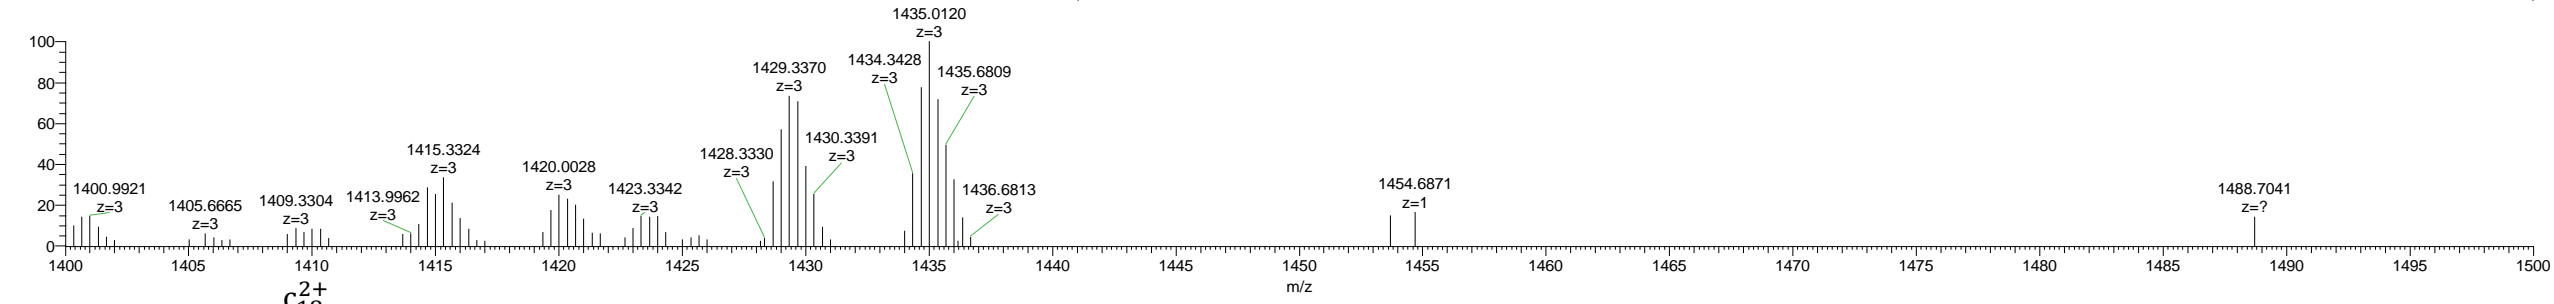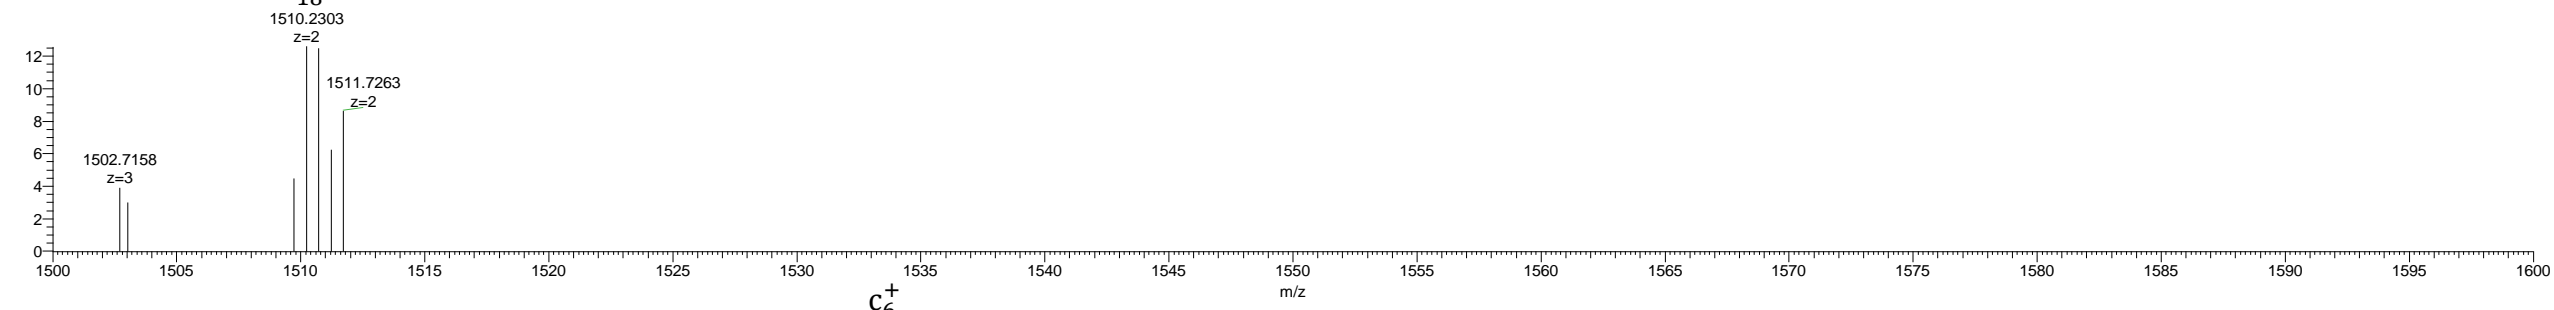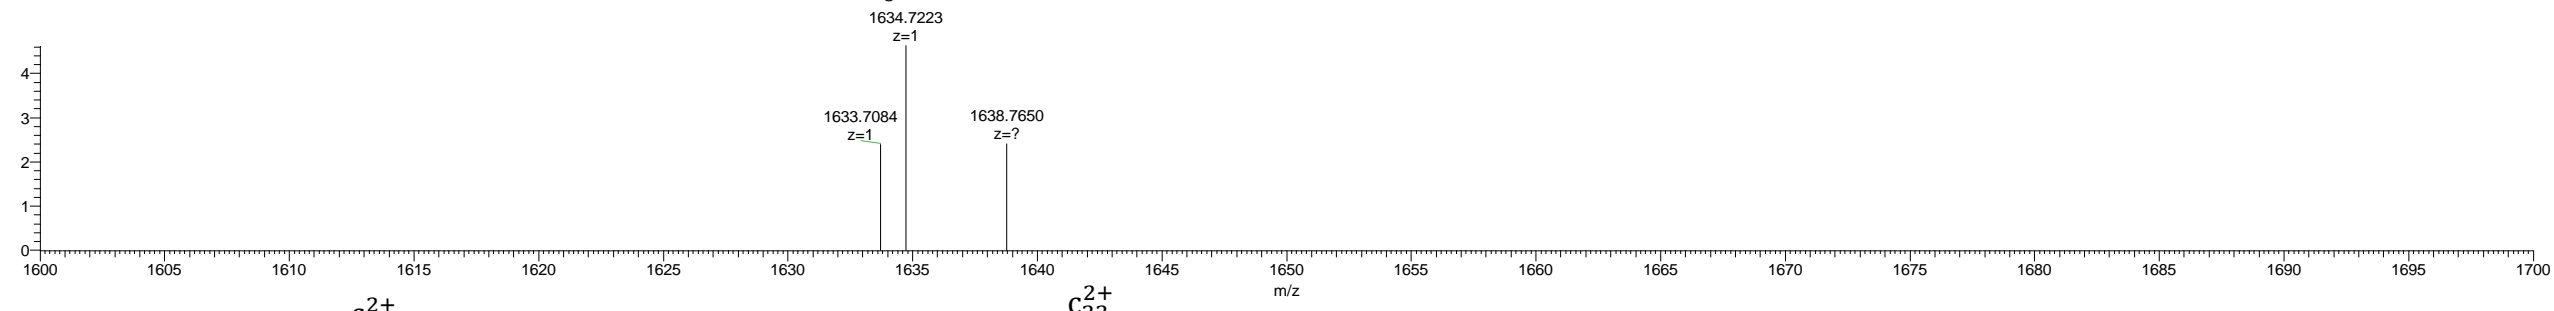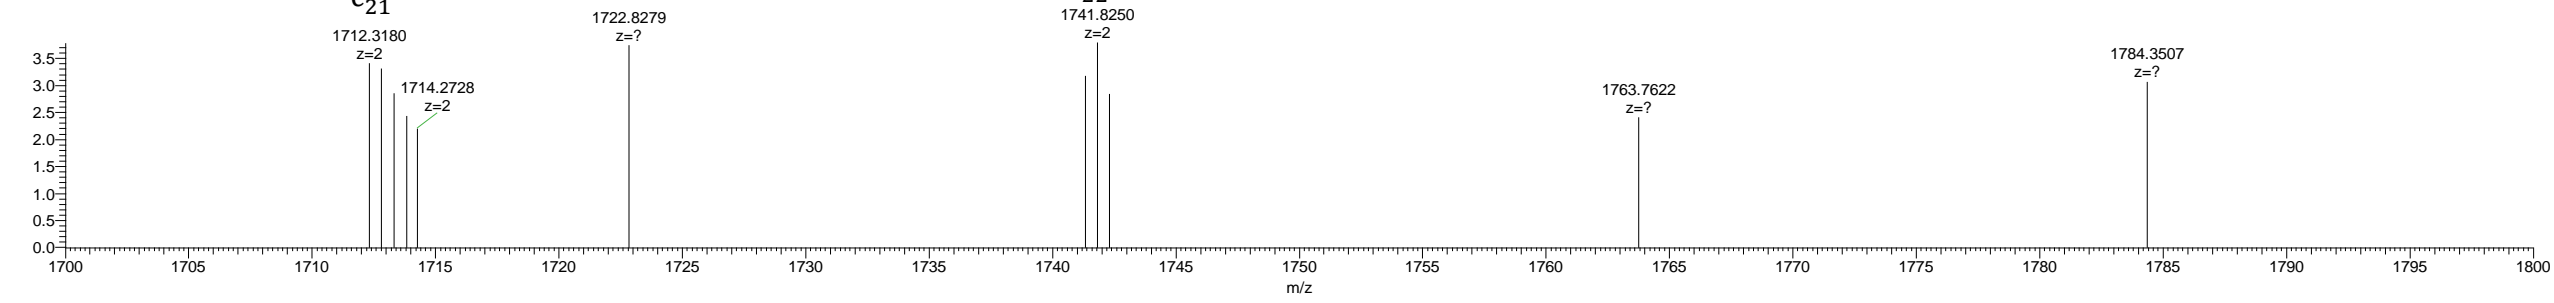

20200930\_rad\_PepMap\_50cm\_Ragon\_Trypsin\_PNGaseF\_ETHcD #29413 RT: 95.61 AV: 1 NL: 3.25E4  
T: FTMS + c NSI d sa Full ms2 861.2101@etd16.61 861.2101@hcd15.00 [110.0000-2000.0000]

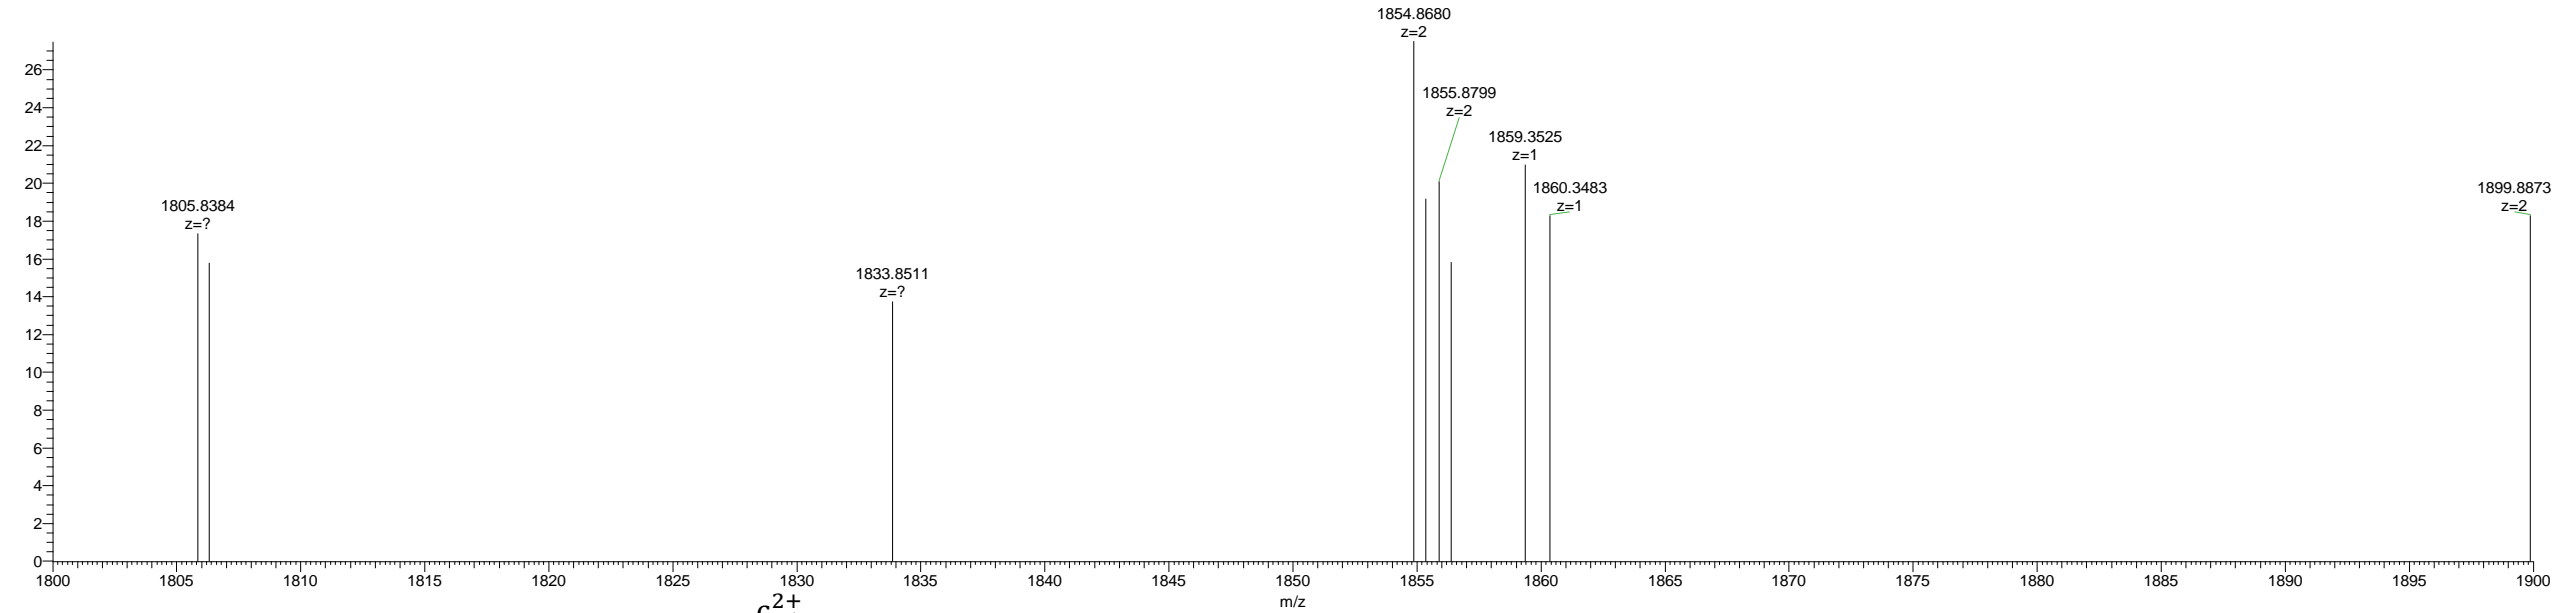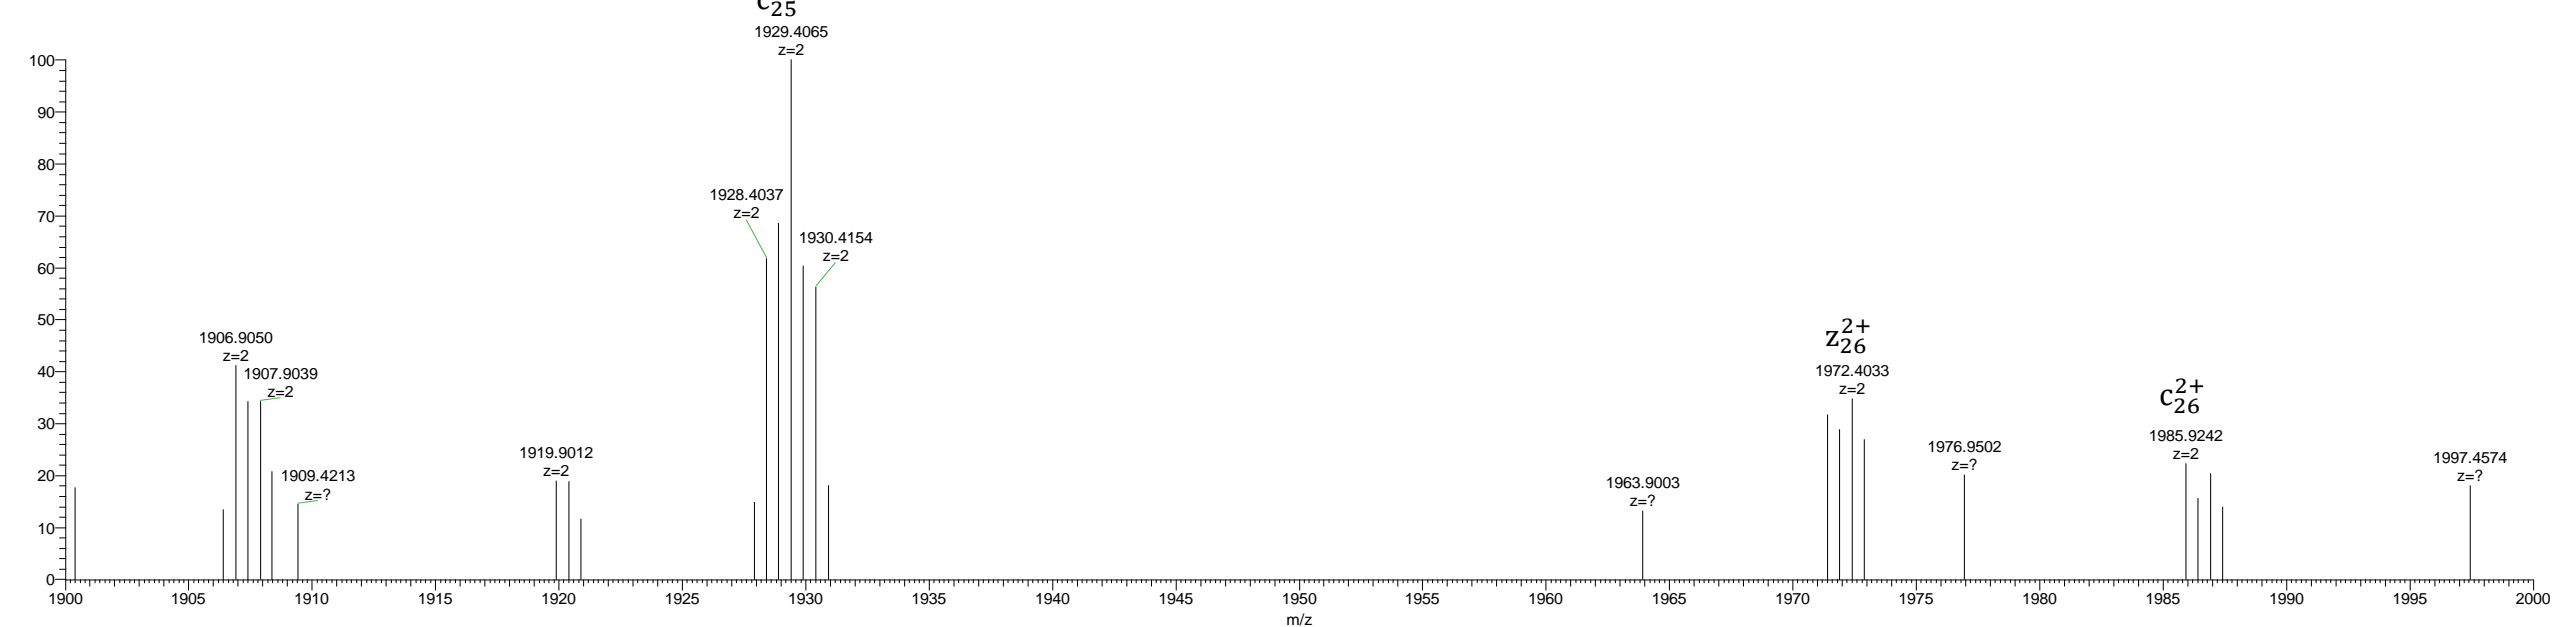

| c4+       | c3+       | c2+       | c+        |    | AA         |    | z•+       | z•2+      | z•3+      | z•4+      |
|-----------|-----------|-----------|-----------|----|------------|----|-----------|-----------|-----------|-----------|
| 27.0219   | 35.6935   | 53.0366   | 105.0659  | 1  | S          | 29 |           |           |           |           |
| 66.0472   | 87.7272   | 131.0871  | 261.1670  | 2  | R          | 28 | 4195.9513 | 2098.4793 | 1399.3219 | 1049.7433 |
| 90.8143   | 120.7500  | 180.6213  | 360.2354  | 3  | V          | 27 | 4039.8502 | 2020.4287 | 1347.2882 | 1010.7180 |
| 122.8289  | 163.4362  | 244.6506  | 488.2940  | 4  | Q          | 26 | 3940.7818 | 1970.8945 | 1314.2654 | 985.9509  |
| 147.0921  | 195.7871  | 293.1770  | 585.3467  | 5  | P          | 25 | 3812.7232 | 1906.8652 | 1271.5792 | 953.9362  |
| 409.1848  | 545.2440  | 817.3623  | 1633.7174 | 6  | T (Glycan) | 24 | 3715.6704 | 1858.3388 | 1239.2283 | 929.6731  |
| 441.4455  | 588.2582  | 881.8836  | 1762.7600 | 7  | E          | 23 | 2667.2997 | 1334.1535 | 889.7714  | 667.5804  |
| 463.2035  | 617.2689  | 925.3997  | 1849.7921 | 8  | S          | 22 | 2538.2571 | 1269.6322 | 846.7572  | 635.3197  |
| 491.4745  | 654.9636  | 981.9417  | 1962.8761 | 9  | I          | 21 | 2451.2251 | 1226.1162 | 817.7465  | 613.5617  |
| 516.2416  | 687.9864  | 1031.4759 | 2061.9445 | 10 | V          | 20 | 2338.1410 | 1169.5741 | 780.0519  | 585.2907  |
| 555.2669  | 740.0201  | 1109.5265 | 2218.0456 | 11 | R          | 19 | 2239.0726 | 1120.0399 | 747.0290  | 560.5236  |
| 592.0340  | 789.0429  | 1183.0607 | 2365.1141 | 12 | F          | 18 | 2082.9715 | 1041.9894 | 694.9953  | 521.4983  |
| 616.2972  | 821.3938  | 1231.5870 | 2462.1668 | 13 | P          | 17 | 1935.9031 | 968.4552  | 645.9725  | 484.7312  |
| 645.0539  | 859.7361  | 1289.1005 | 2577.1937 | 14 | N (deam)   | 16 | 1838.8503 | 919.9288  | 613.6216  | 460.4680  |
| 673.3249  | 897.4308  | 1345.6425 | 2690.2778 | 15 | I          | 15 | 1723.8234 | 862.4153  | 575.2793  | 431.7113  |
| 698.5868  | 931.1133  | 1396.1664 | 2791.3255 | 16 | T          | 14 | 1610.7393 | 805.8733  | 537.5846  | 403.4403  |
| 727.0976  | 969.1277  | 1453.1878 | 2905.3684 | 17 | N          | 13 | 1509.6917 | 755.3495  | 503.9021  | 378.1784  |
| 755.3686  | 1006.8223 | 1509.7299 | 3018.4525 | 18 | L          | 12 | 1395.6487 | 698.3280  | 465.8878  | 349.6676  |
| 795.3762  | 1060.1659 | 1589.7452 | 3178.4831 | 19 | C          | 11 | 1282.5647 | 641.7860  | 428.1931  | 321.3966  |
| 819.6394  | 1092.5168 | 1638.2716 | 3275.5359 | 20 | P          | 10 | 1122.5340 | 561.7706  | 374.8495  | 281.3890  |
| 856.4065  | 1141.5396 | 1711.8058 | 3422.6043 | 21 | F          | 9  | 1025.4812 | 513.2443  | 342.4986  | 257.1258  |
| 870.6619  | 1160.5468 | 1740.3165 | 3479.6258 | 22 | G          | 8  | 878.4128  | 439.7101  | 293.4758  | 220.3587  |
| 902.9225  | 1203.5610 | 1804.8378 | 3608.6684 | 23 | E          | 7  | 821.3914  | 411.1993  | 274.4686  | 206.1033  |
| 927.6896  | 1236.5838 | 1854.3720 | 3707.7368 | 24 | V          | 6  | 692.3488  | 346.6780  | 231.4544  | 173.8426  |
| 964.4567  | 1285.6066 | 1927.9062 | 3854.8052 | 25 | F          | 5  | 593.2804  | 297.1438  | 198.4316  | 149.0755  |
| 993.2135  | 1323.9489 | 1985.4197 | 3969.8321 | 26 | N (deam)   | 4  | 446.2119  | 223.6096  | 149.4088  | 112.3084  |
| 1010.9728 | 1347.6279 | 2020.9383 | 4040.8692 | 27 | A          | 3  | 331.1850  | 166.0961  | 111.0665  | 83.5517   |
| 1036.2347 | 1381.3105 | 2071.4621 | 4141.9169 | 28 | T          | 2  | 260.1479  | 130.5776  | 87.3875   | 65.7924   |
|           |           |           |           | 29 | R          | 1  | 159.1002  | 80.0537   | 53.7049   | 40.5305   |

$$z_{11} : \begin{array}{r} 1282.5647 \\ - 90.0014 \\ \hline 1192.5633 \end{array} \quad (\bullet\text{S-CH}_2\text{-CO-NH}_2)$$

SASRVQPTESIVRFPNITNLCPFGEVFNATR  
EThcD

20200930\_rad\_PepMap\_50cm\_M69\_Trypsin\_PNGaseF\_EThcD #29443 RT: 95.13 AV: 1 NL: 1.01E6  
T: FTMS + c NSI d sa Full ms2 1115.5233@etd25.96 1115.5233@hcd15.00 [110.0000-2000.0000]

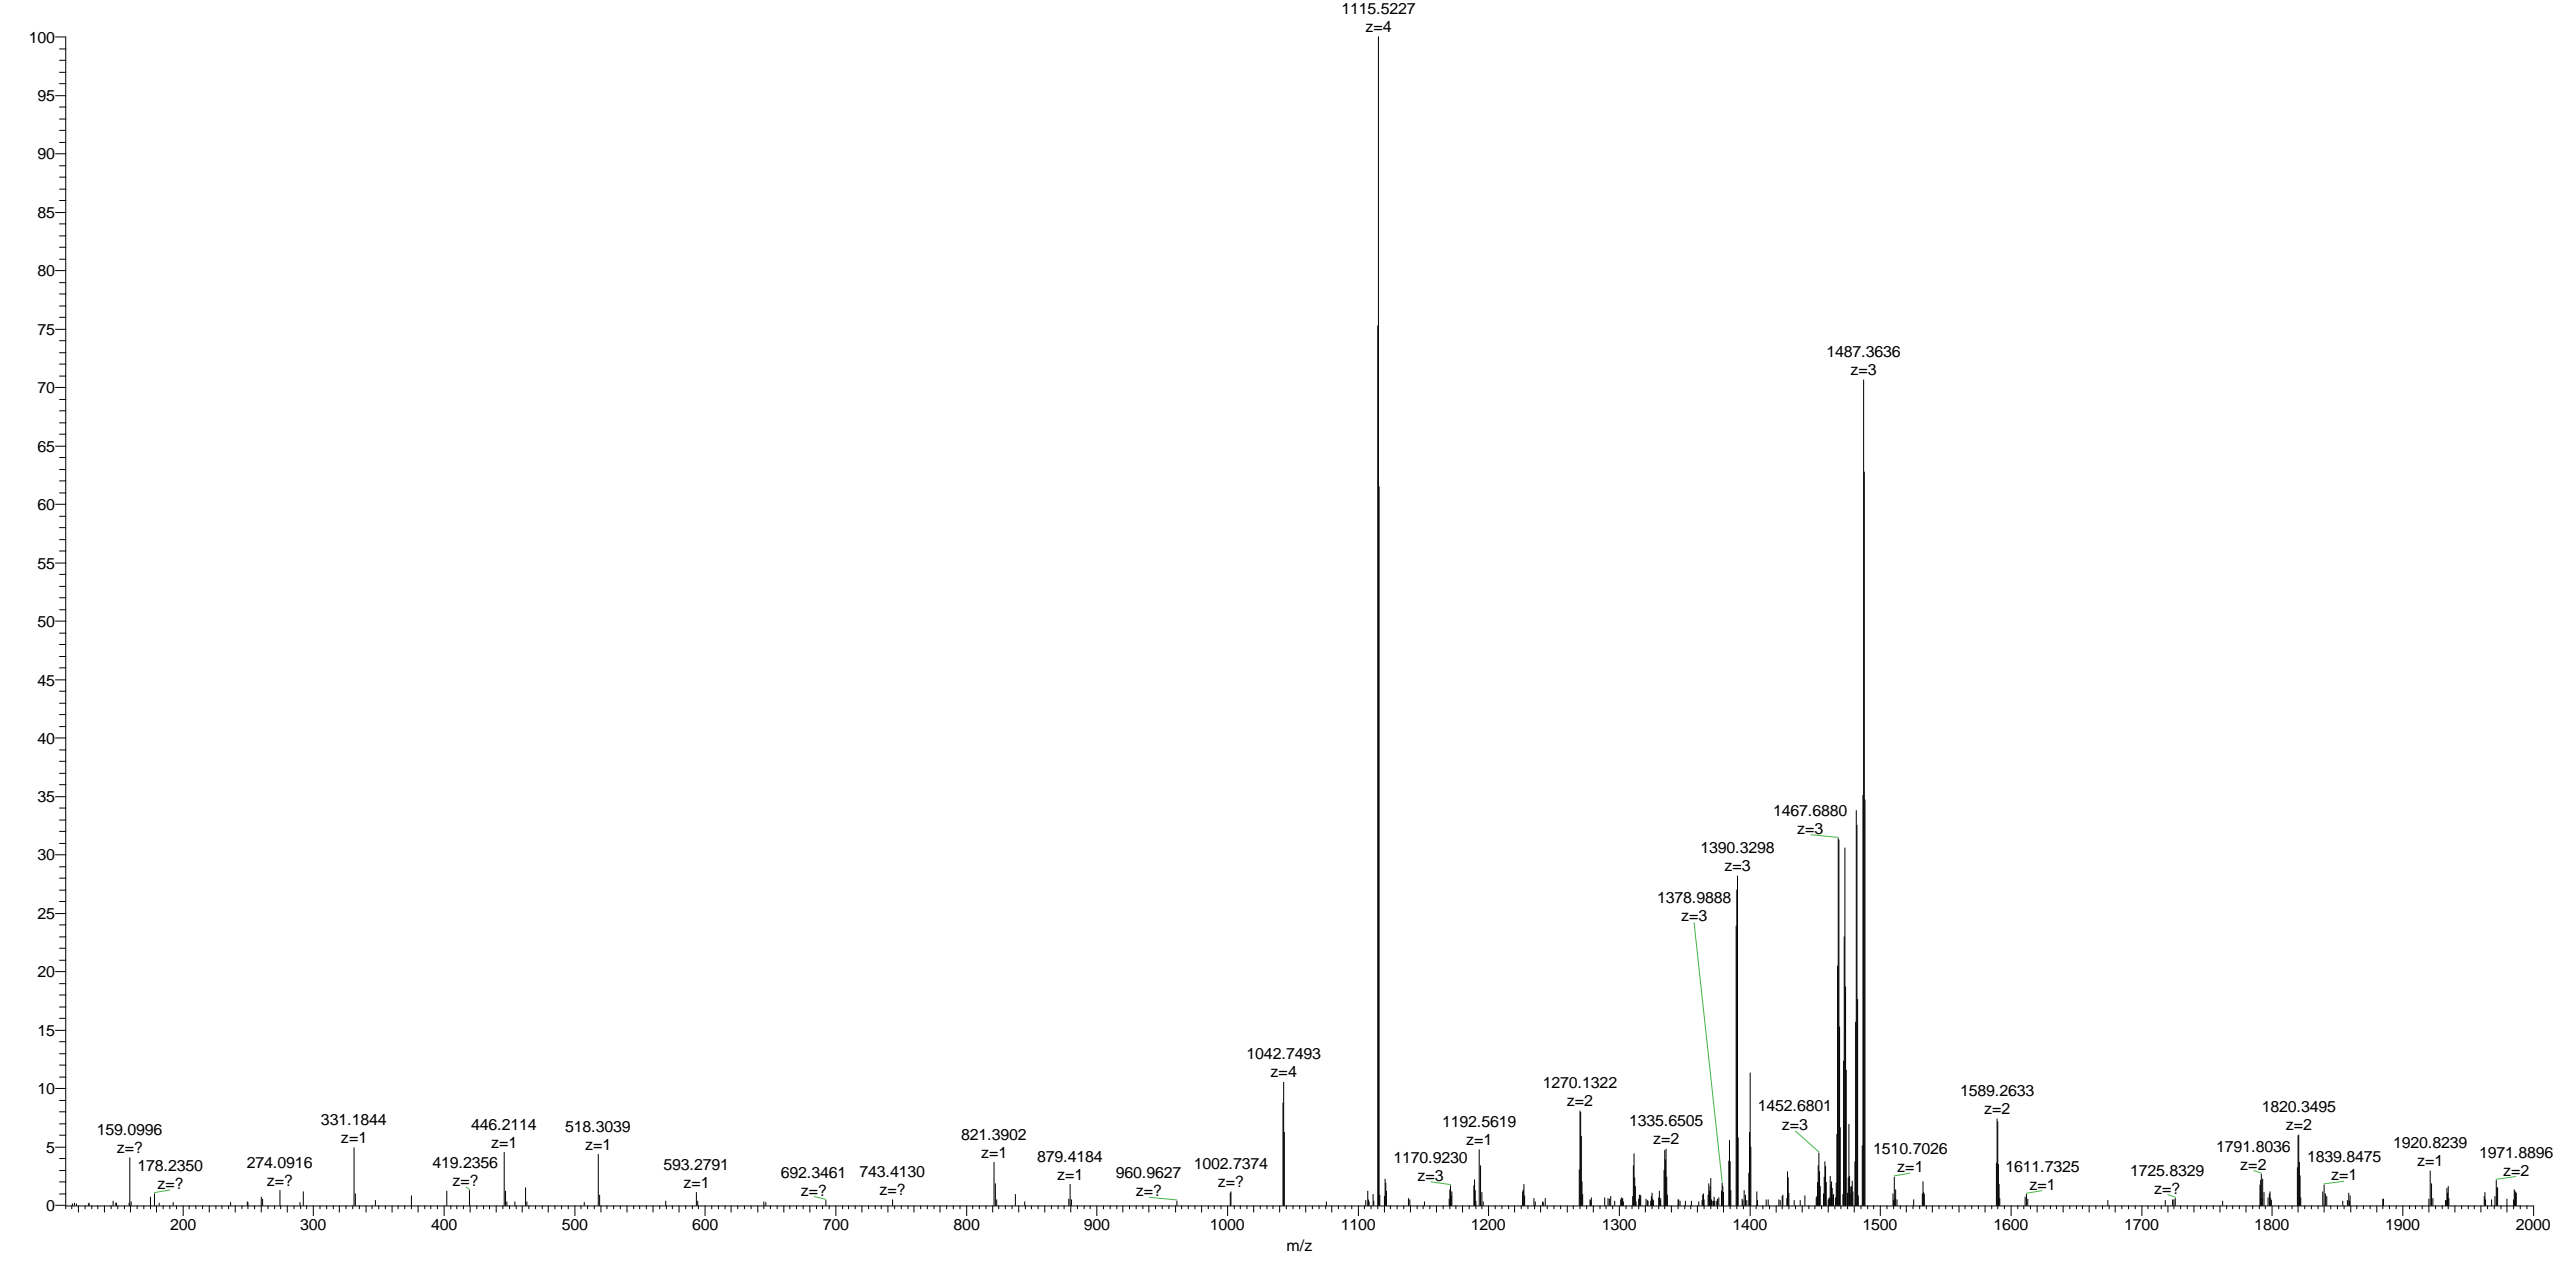

20200930\_rad\_PepMap\_50cm\_M69\_Trypsin\_PNGaseF\_ETHcD #29443 RT: 95.13 AV: 1 NL: 4.96E4  
T: FTMS + c NSI da Full ms2 1115.5233@etd25.96 1115.5233@hcd15.00 [110.0000-2000.0000]

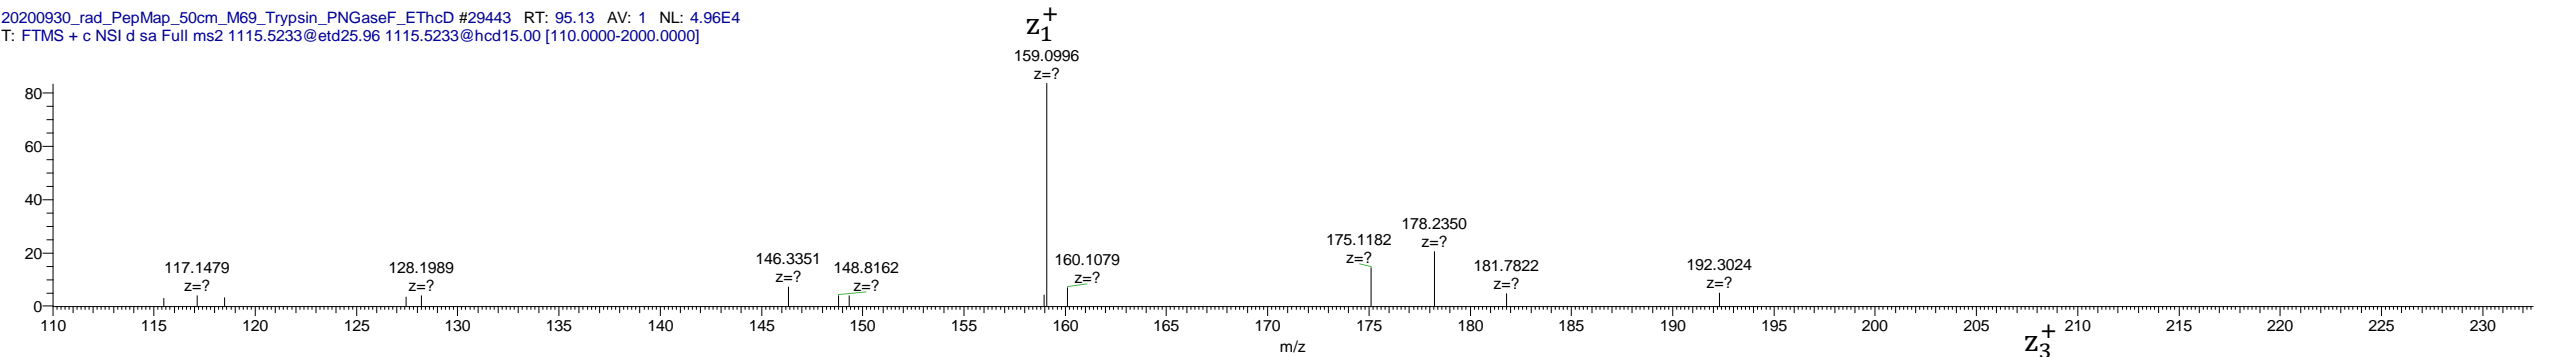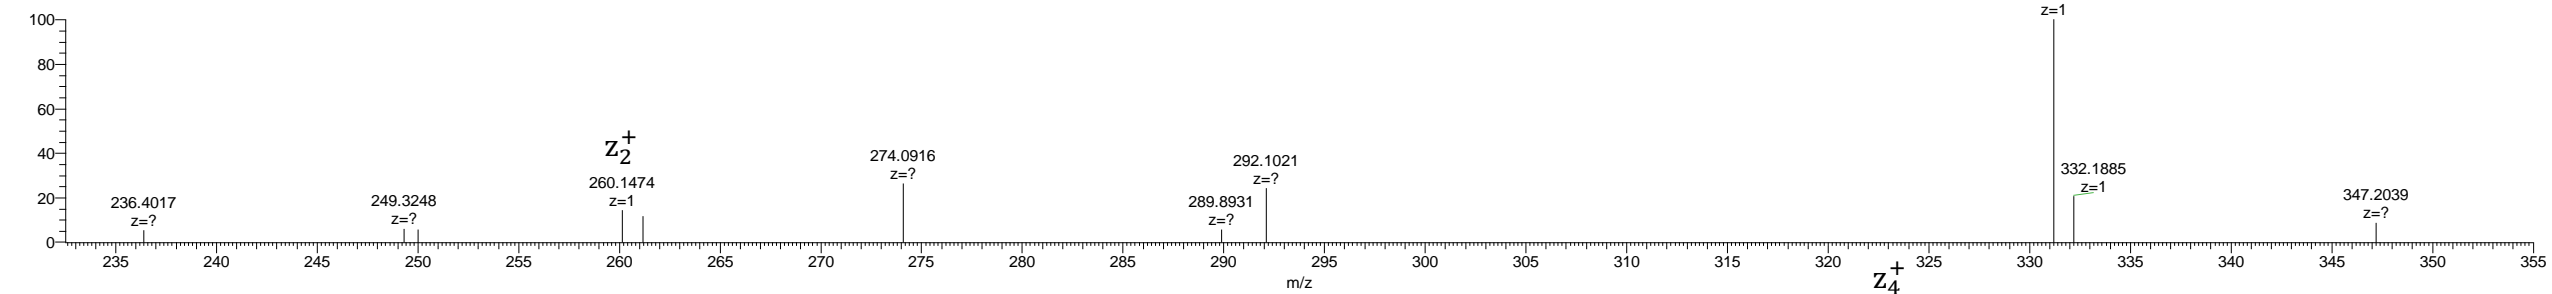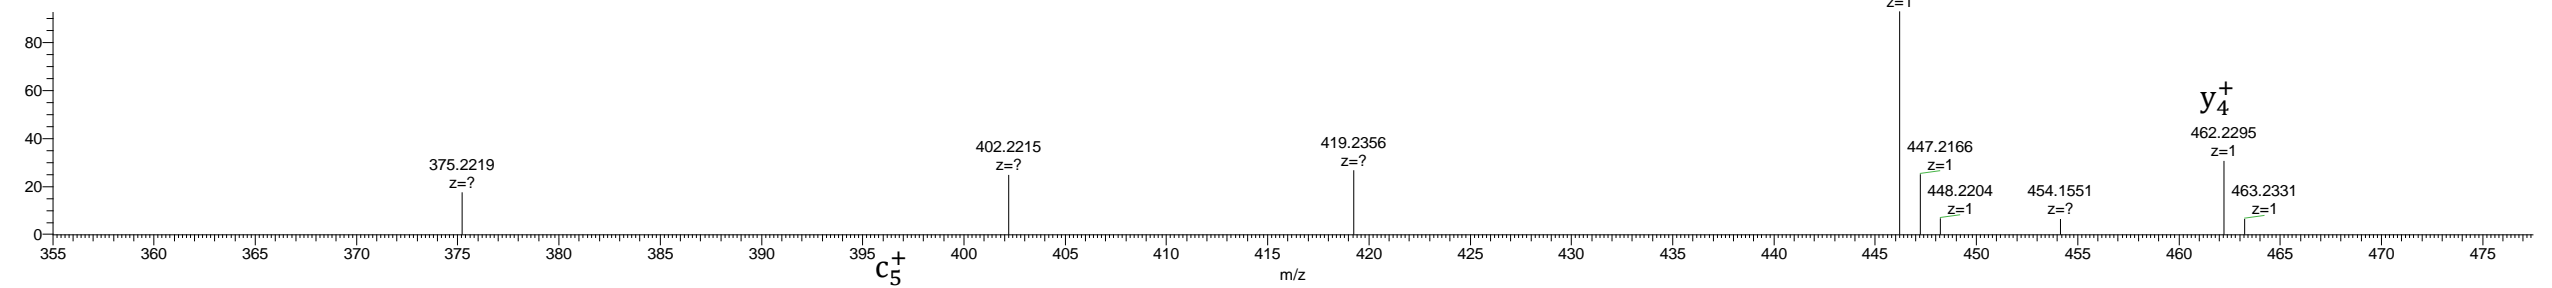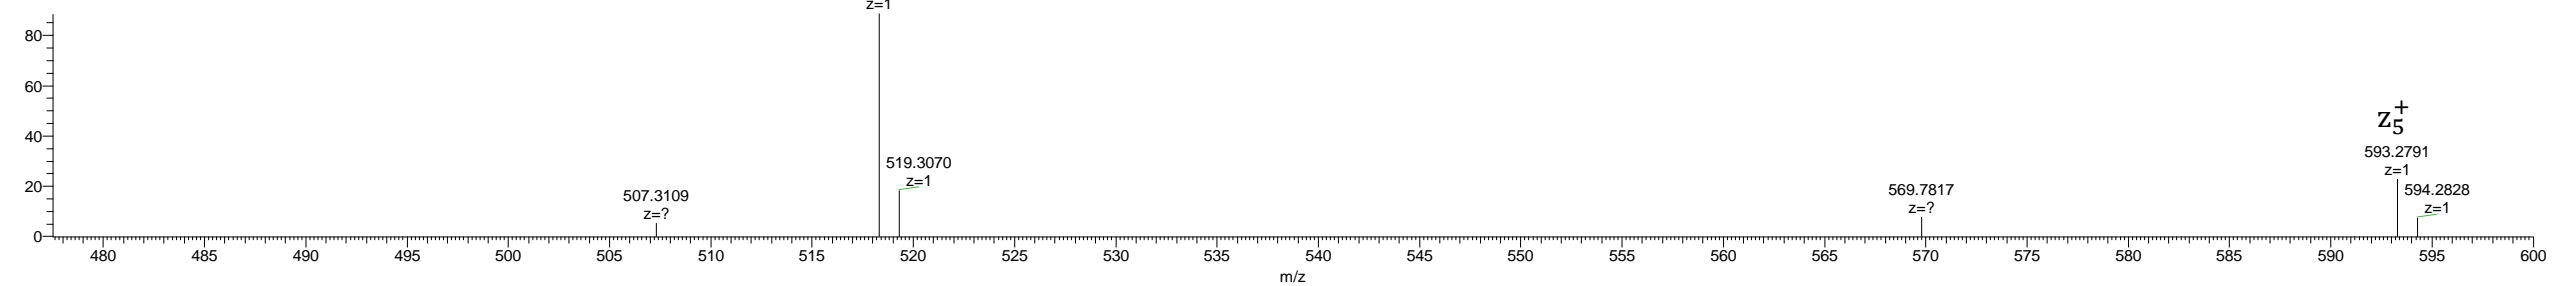



20200930\_rad\_PepMap\_50cm\_M69\_Trypsin\_PNGaseF\_ETHcD #29443 RT: 95.13 AV: 1 NL: 3.70E4  
T: FTMS + c NSI d sa Full ms2 1115.5233@etd25.96 1115.5233@hcd15.00 [110.0000-2000.0000]

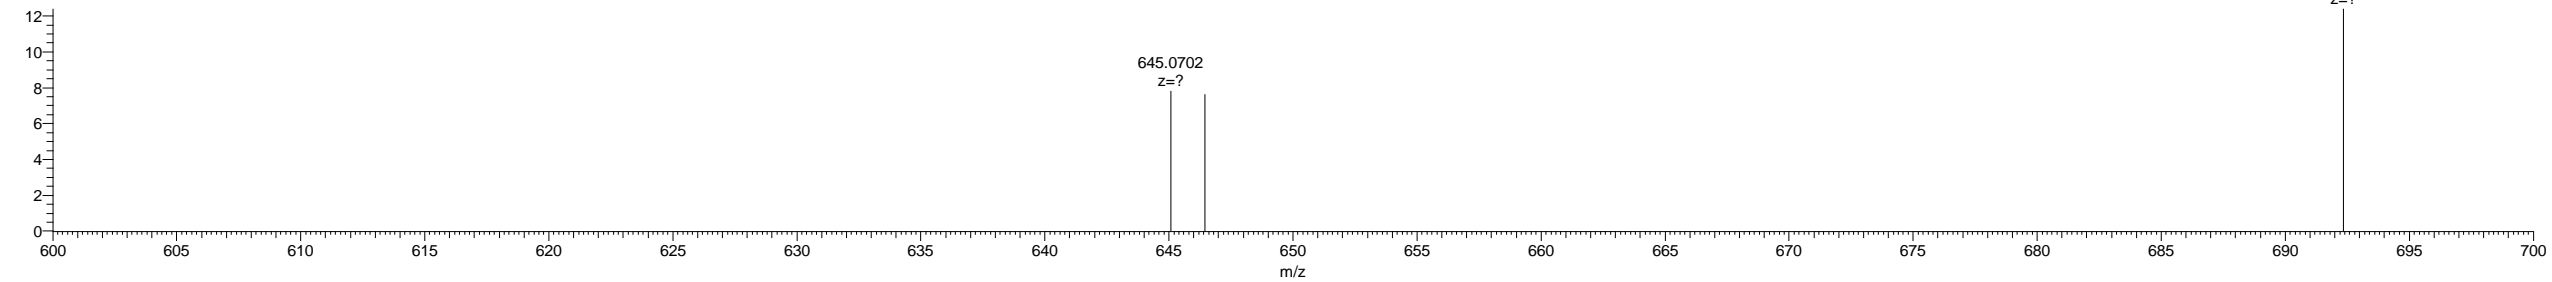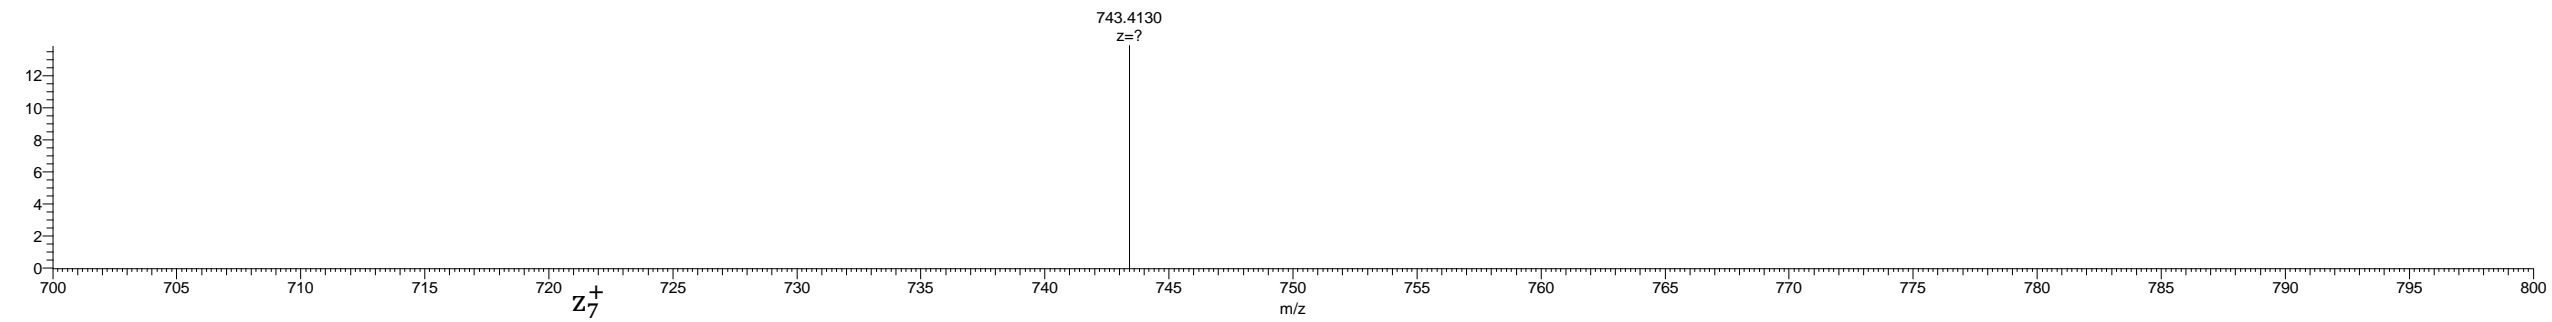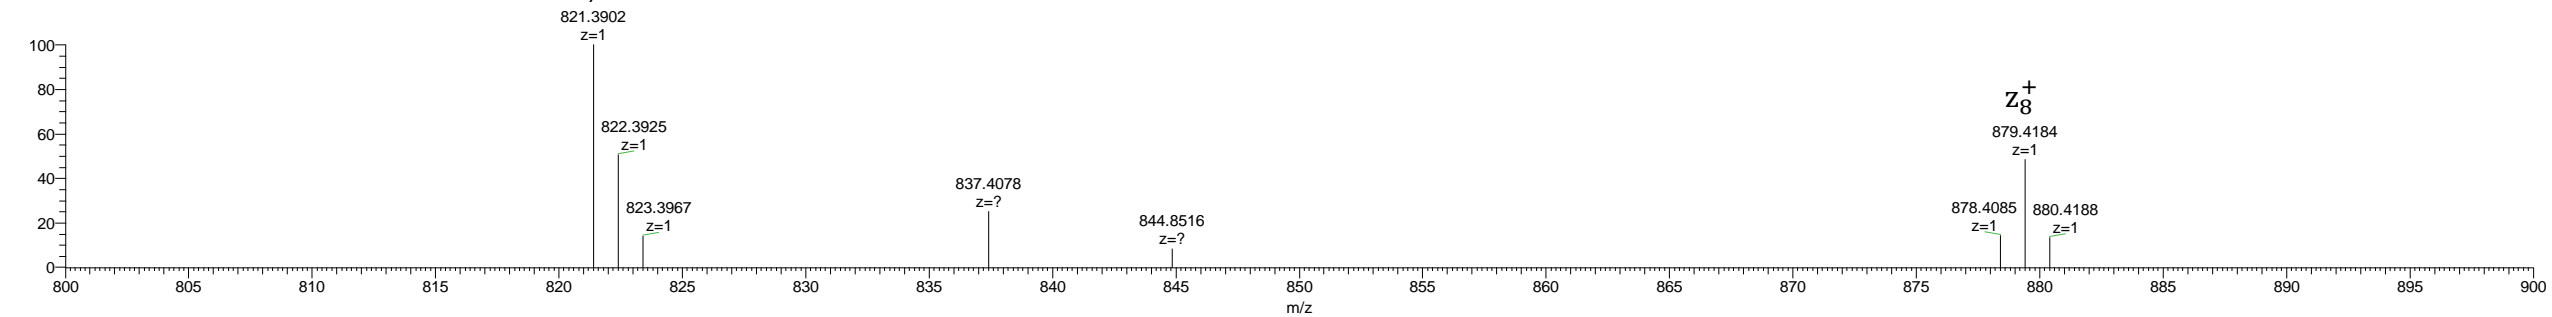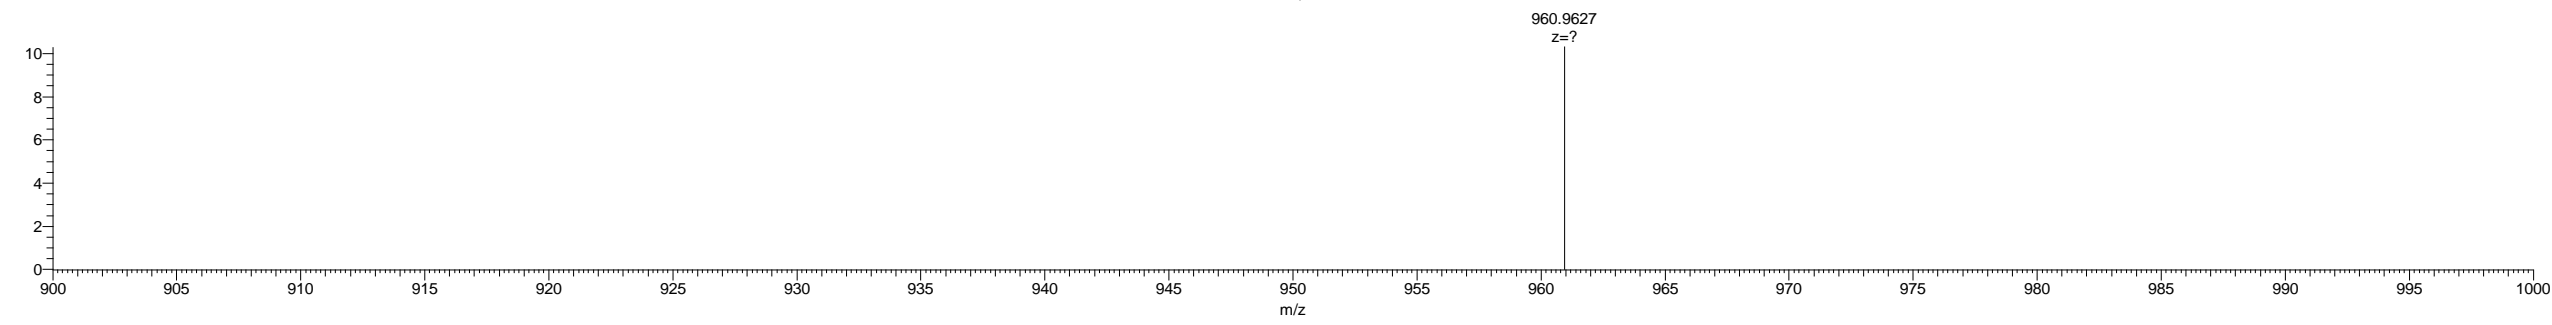

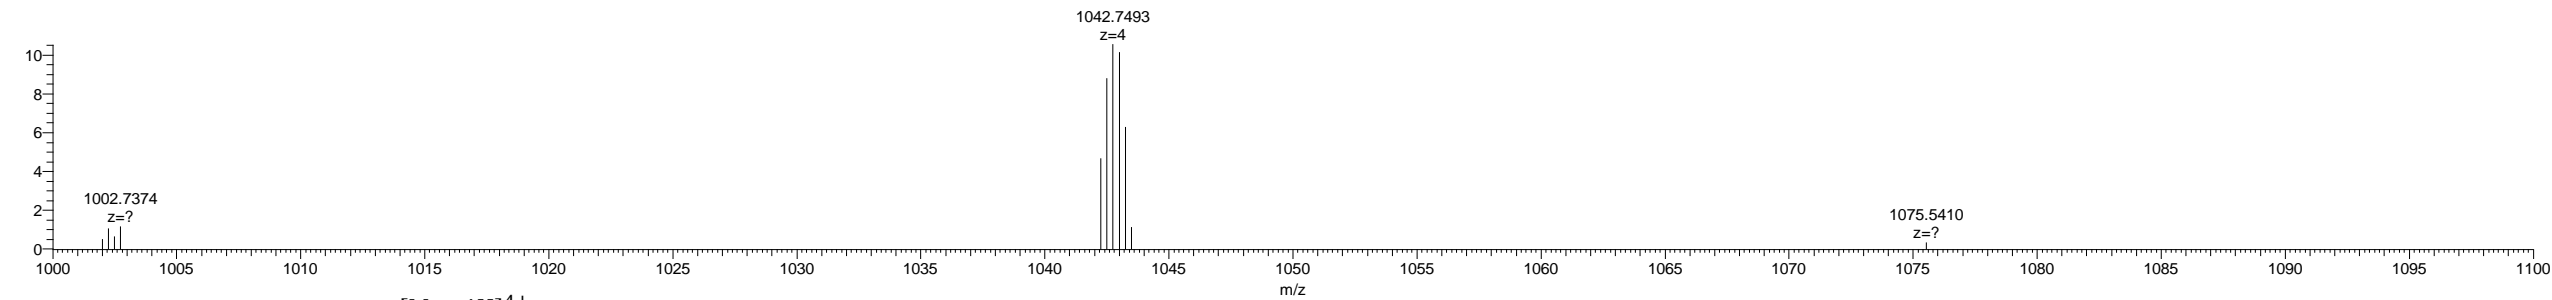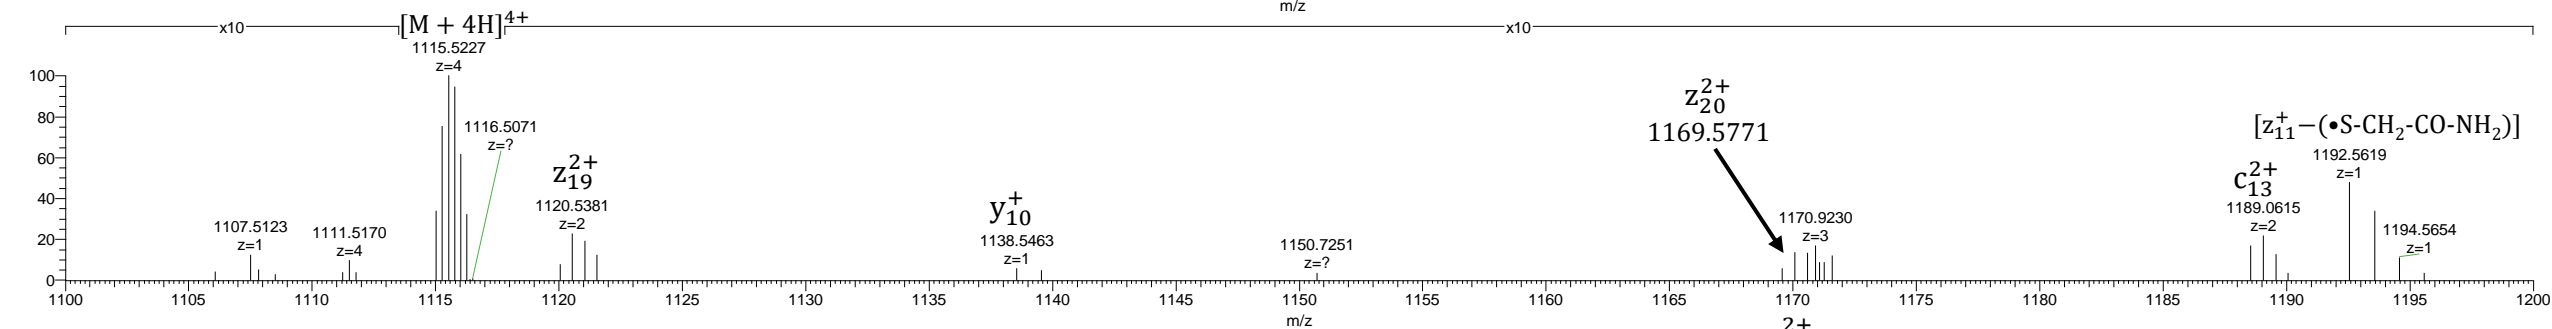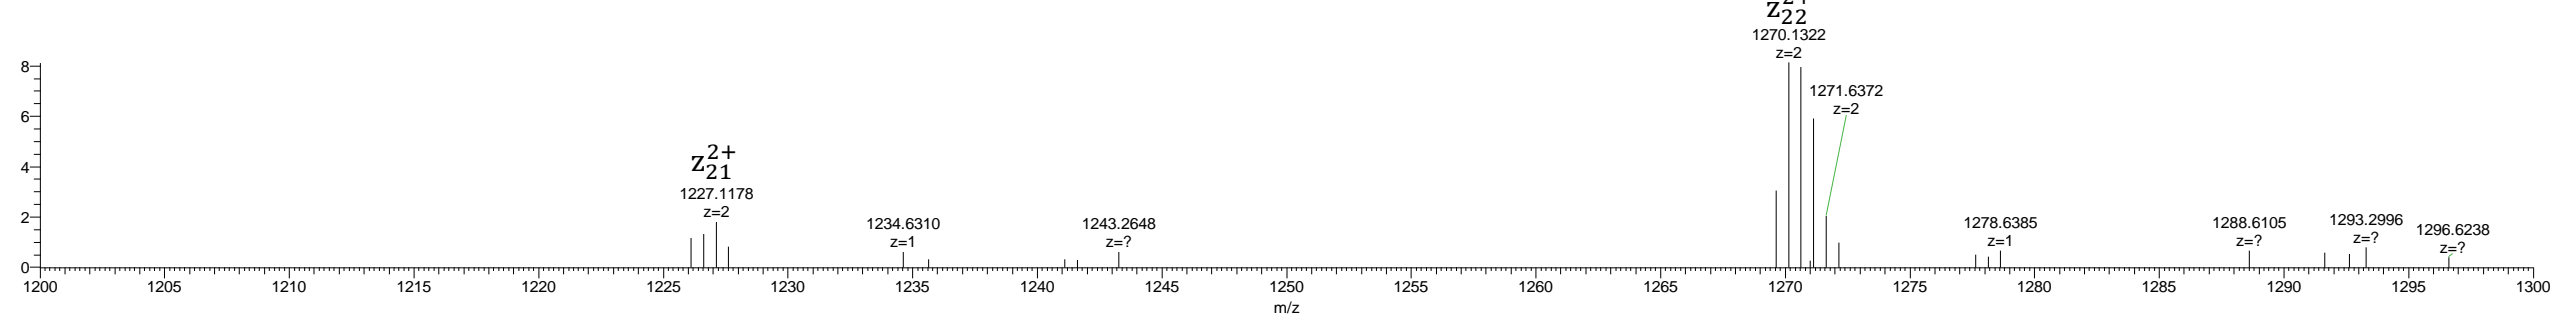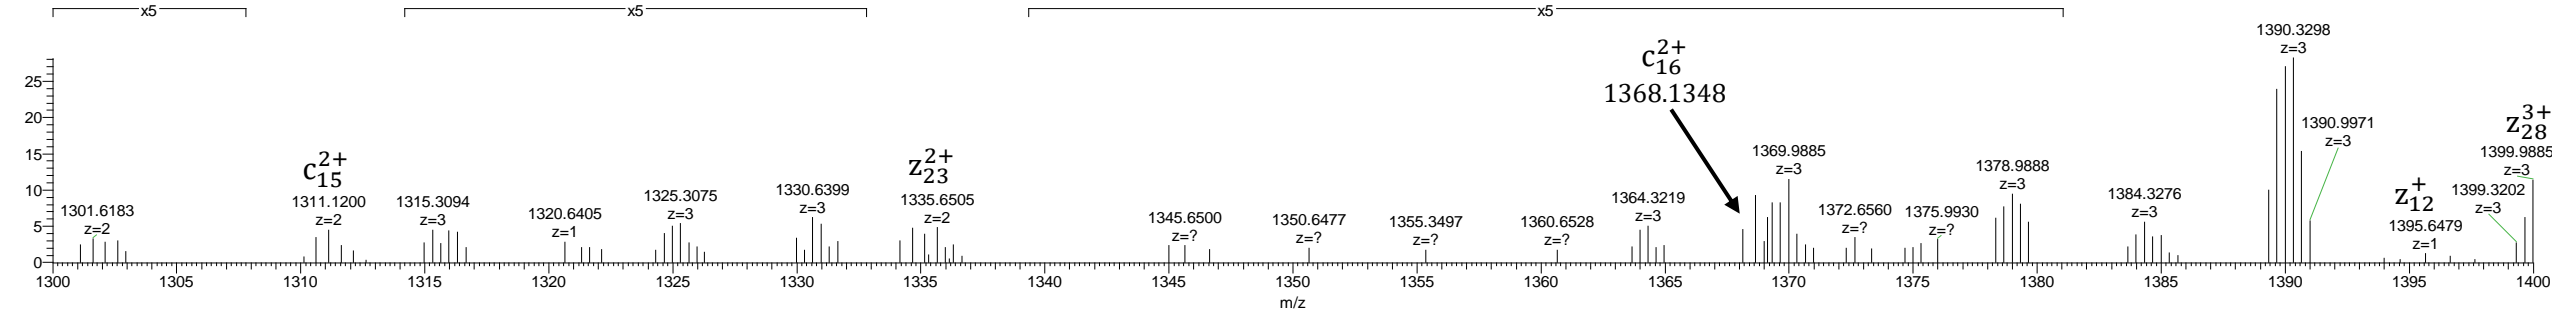

20200930\_rad\_PepMap\_50cm\_M69\_Trypsin\_PNGaseF\_ETHcD #29443 RT: 95.13 AV: 1 NL: 7.11E5  
T: FTMS + c NSI d sa Full ms2 1115.5233@etd25.96 1115.5233@hcd15.00 [110.0000-2000.0000]

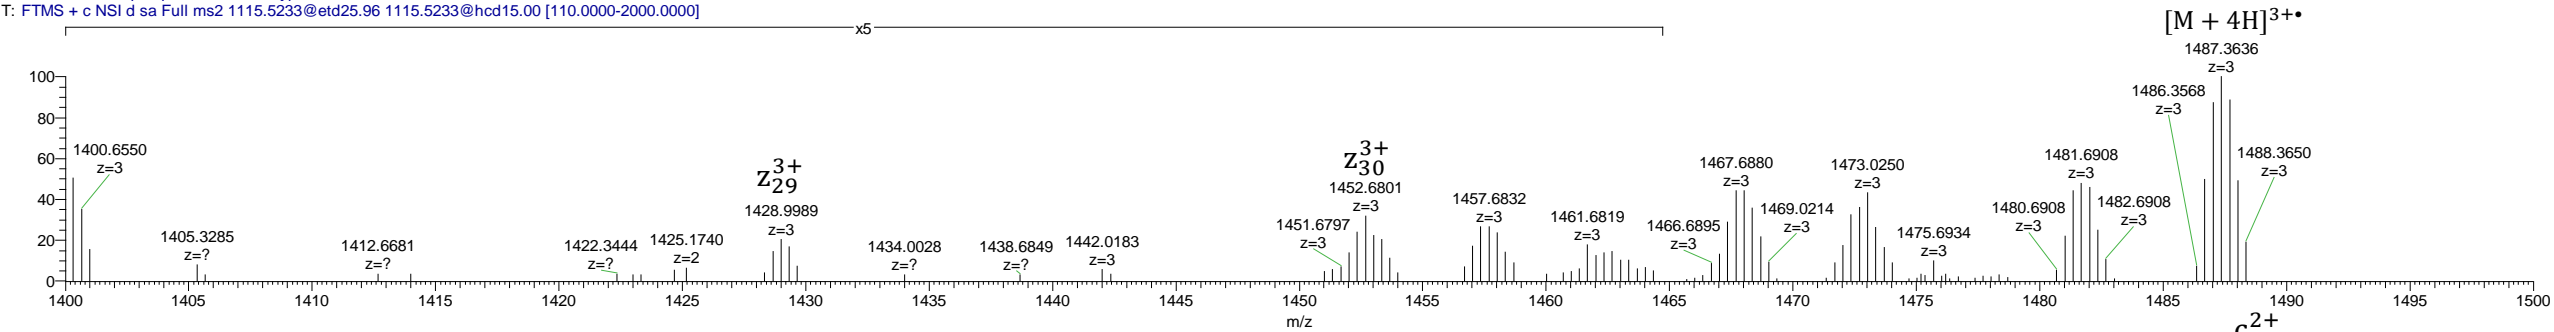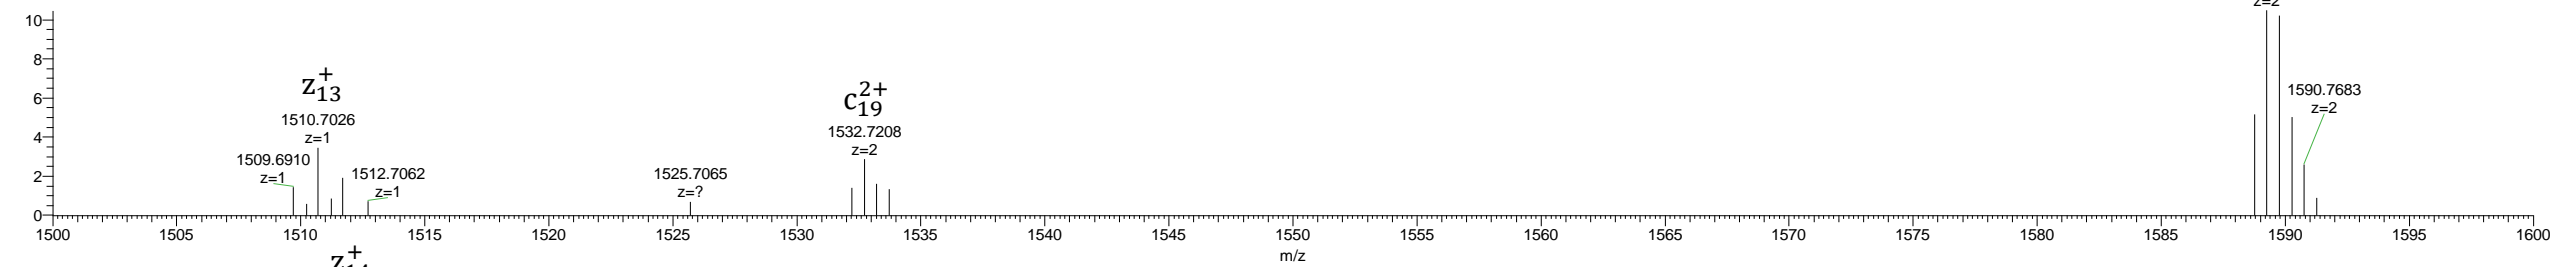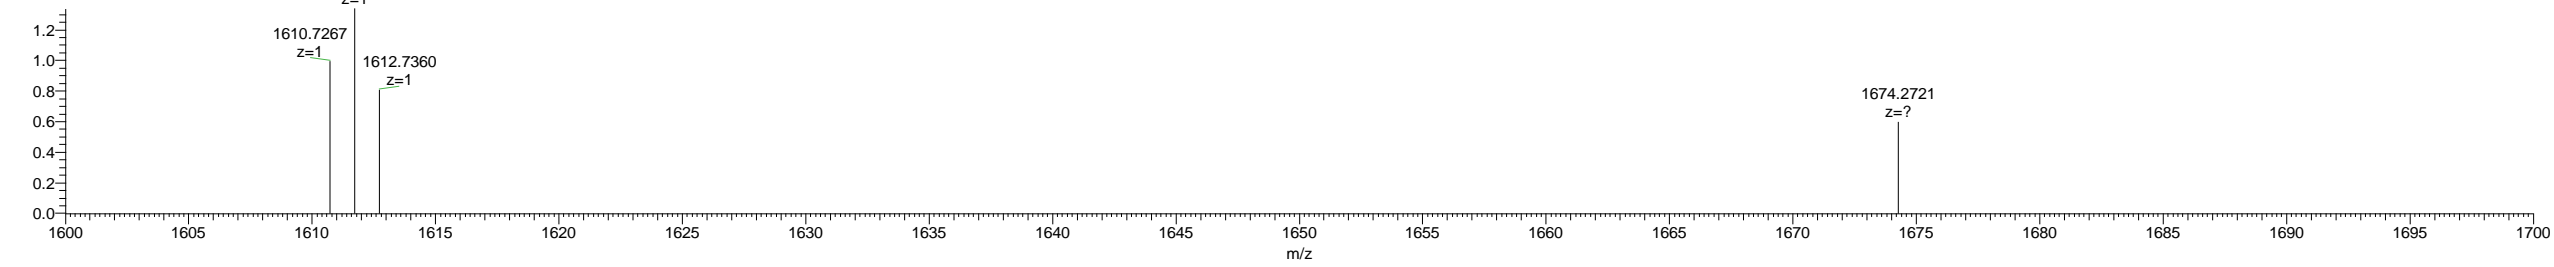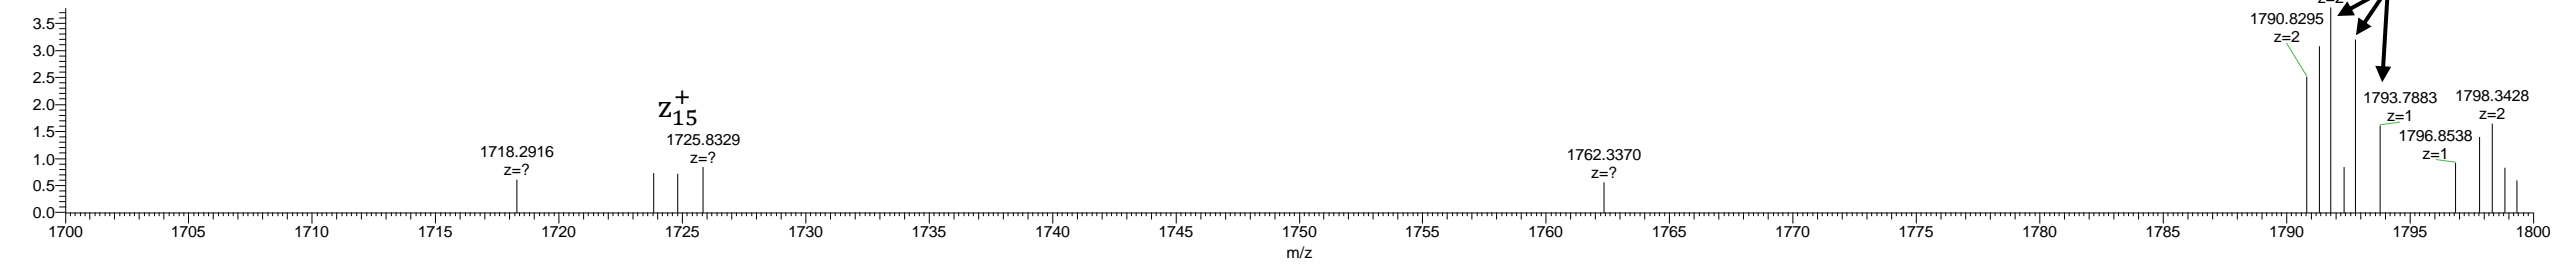

20200930\_rad\_PepMap\_50cm\_M69\_Trypsin\_PNGaseF\_ETHcD #29443 RT: 95.13 AV: 1 NL: 6.08E4  
T: FTMS + c NSI d sa Full ms2 1115.5233@etd25.96 1115.5233@hcd15.00 [110.0000-2000.0000]

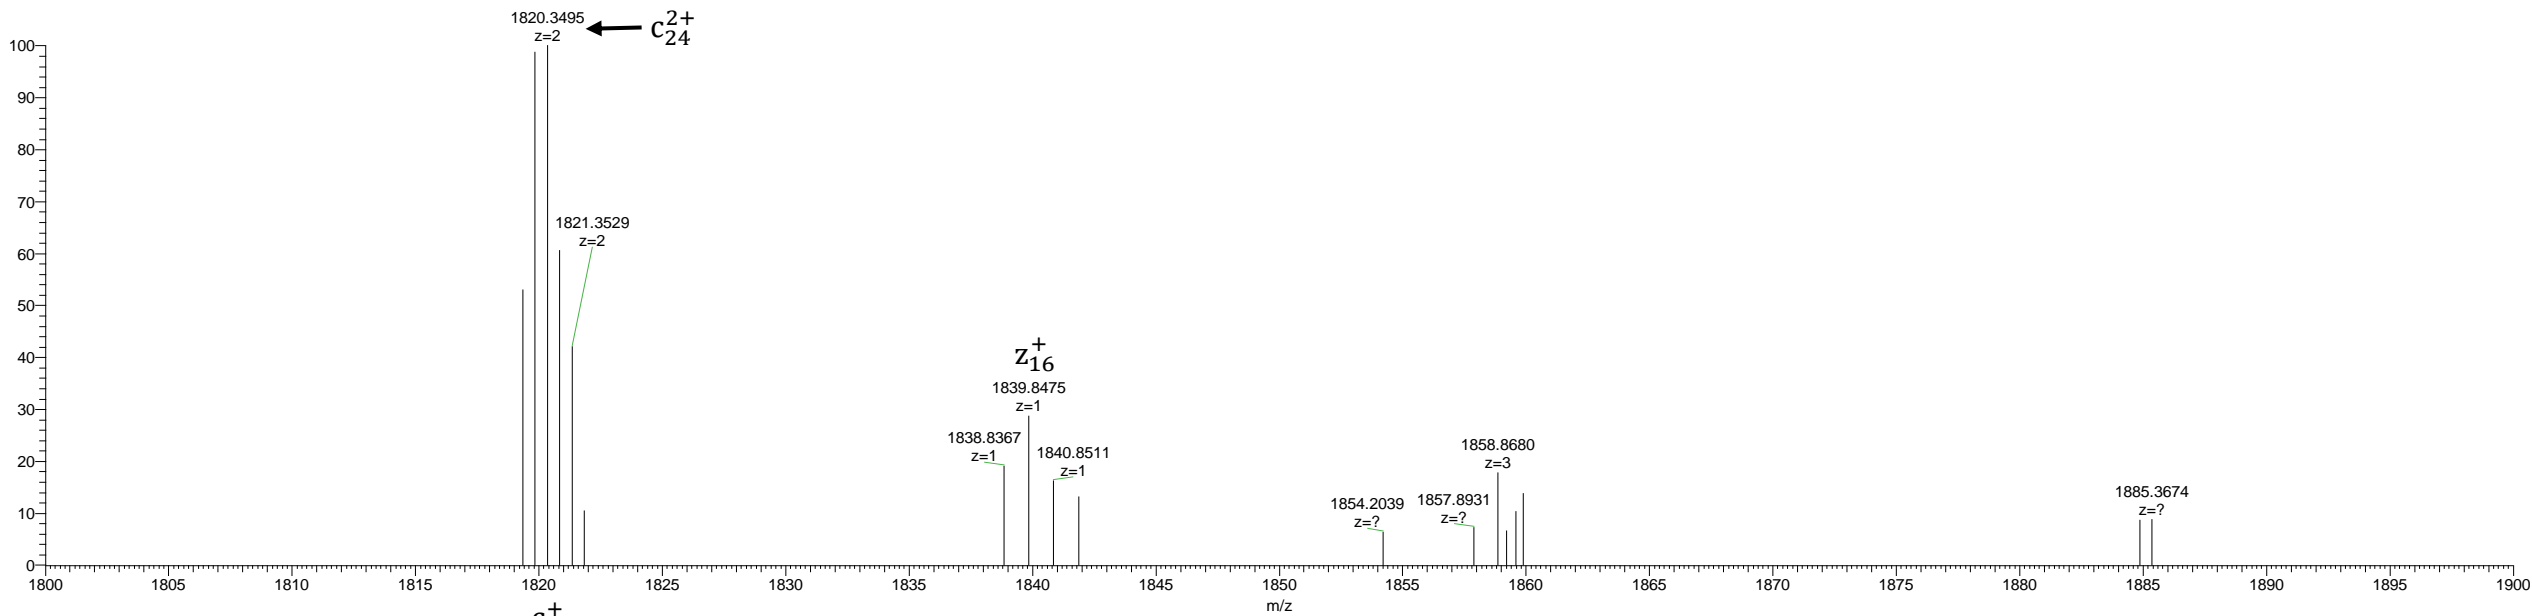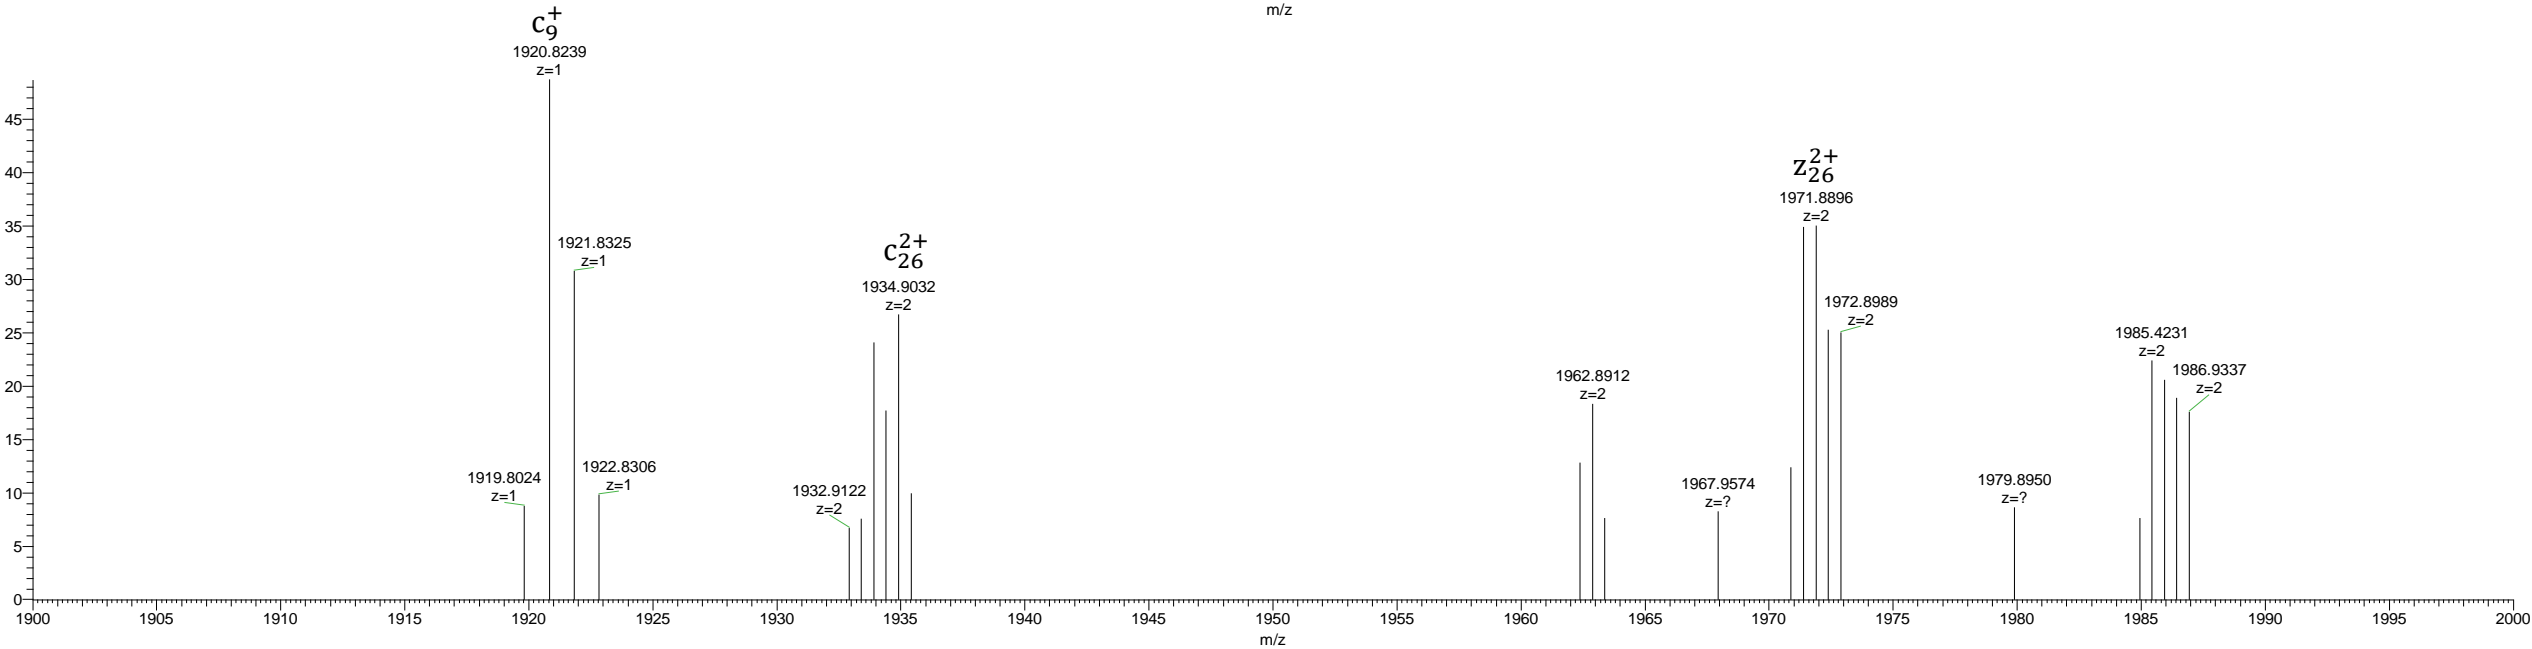

| c4+       | c3+       | c2+       | c+        |    | AA         |    | z++       | z•2+      | z•3+      | z•4+      |
|-----------|-----------|-----------|-----------|----|------------|----|-----------|-----------|-----------|-----------|
| 27.0219   | 35.6935   | 53.0366   | 105.0659  | 1  | S          | 31 |           |           |           |           |
| 44.7812   | 59.3725   | 88.5551   | 176.1030  | 2  | A          | 30 | 4354.0204 | 2177.5138 | 1452.0117 | 1089.2606 |
| 66.5392   | 88.3832   | 132.0711  | 263.1350  | 3  | S          | 29 | 4282.9833 | 2141.9953 | 1428.3326 | 1071.5013 |
| 105.5645  | 140.4169  | 210.1217  | 419.2361  | 4  | R          | 28 | 4195.9513 | 2098.4793 | 1399.3219 | 1049.7433 |
| 130.3316  | 173.4397  | 259.6559  | 518.3045  | 5  | V          | 27 | 4039.8502 | 2020.4287 | 1347.2882 | 1010.7180 |
| 162.3462  | 216.1259  | 323.6852  | 646.3631  | 6  | Q          | 26 | 3940.7818 | 1970.8945 | 1314.2654 | 985.9509  |
| 186.6094  | 248.4768  | 372.2116  | 743.4159  | 7  | P          | 25 | 3812.7232 | 1906.8652 | 1271.5792 | 953.9362  |
| 448.7021  | 597.9337  | 896.3969  | 1791.7866 | 8  | T (Glycan) | 24 | 3715.6704 | 1858.3388 | 1239.2283 | 929.6731  |
| 480.9627  | 640.9479  | 960.9182  | 1920.8292 | 9  | E          | 23 | 2667.2997 | 1334.1535 | 889.7714  | 667.5804  |
| 502.7208  | 669.9586  | 1004.4342 | 2007.8612 | 10 | S          | 22 | 2538.2571 | 1269.6322 | 846.7572  | 635.3197  |
| 530.9918  | 707.6533  | 1060.9763 | 2120.9453 | 11 | I          | 21 | 2451.2251 | 1226.1162 | 817.7465  | 613.5617  |
| 555.7589  | 740.6761  | 1110.5105 | 2220.0137 | 12 | V          | 20 | 2338.1410 | 1169.5741 | 780.0519  | 585.2907  |
| 594.7841  | 792.7098  | 1188.5610 | 2376.1148 | 13 | R          | 19 | 2239.0726 | 1120.0399 | 747.0290  | 560.5236  |
| 631.5513  | 841.7326  | 1262.0952 | 2523.1832 | 14 | F          | 18 | 2082.9715 | 1041.9894 | 694.9953  | 521.4983  |
| 655.8144  | 874.0835  | 1310.6216 | 2620.2360 | 15 | P          | 17 | 1935.9031 | 968.4552  | 645.9725  | 484.7312  |
| 684.5712  | 912.4258  | 1368.1351 | 2735.2629 | 16 | N (deam)   | 16 | 1838.8503 | 919.9288  | 613.6216  | 460.4680  |
| 712.8422  | 950.1205  | 1424.6771 | 2848.3470 | 17 | I          | 15 | 1723.8234 | 862.4153  | 575.2793  | 431.7113  |
| 738.1041  | 983.8031  | 1475.2009 | 2949.3946 | 18 | T          | 14 | 1610.7393 | 805.8733  | 537.5846  | 403.4403  |
| 766.6148  | 1021.8174 | 1532.2224 | 3063.4376 | 19 | N          | 13 | 1509.6917 | 755.3495  | 503.9021  | 378.1784  |
| 794.8859  | 1059.5121 | 1588.7644 | 3176.5216 | 20 | L          | 12 | 1395.6487 | 698.3280  | 465.8878  | 349.6676  |
| 834.8935  | 1112.8556 | 1668.7798 | 3336.5523 | 21 | C          | 11 | 1282.5647 | 641.7860  | 428.1931  | 321.3966  |
| 859.1567  | 1145.2065 | 1717.3062 | 3433.6050 | 22 | P          | 10 | 1122.5340 | 561.7706  | 374.8495  | 281.3890  |
| 895.9238  | 1194.2293 | 1790.8404 | 3580.6734 | 23 | F          | 9  | 1025.4812 | 513.2443  | 342.4986  | 257.1258  |
| 910.1792  | 1213.2365 | 1819.3511 | 3637.6949 | 24 | G          | 8  | 878.4128  | 439.7101  | 293.4758  | 220.3587  |
| 942.4398  | 1256.2507 | 1883.8724 | 3766.7375 | 25 | E          | 7  | 821.3914  | 411.1993  | 274.4686  | 206.1033  |
| 967.2069  | 1289.2735 | 1933.4066 | 3865.8059 | 26 | V          | 6  | 692.3488  | 346.6780  | 231.4544  | 173.8426  |
| 1003.9740 | 1338.2963 | 2006.9408 | 4012.8743 | 27 | F          | 5  | 593.2804  | 297.1438  | 198.4316  | 149.0755  |
| 1032.7308 | 1376.6386 | 2064.4543 | 4127.9013 | 28 | N (deam)   | 4  | 446.2119  | 223.6096  | 149.4088  | 112.3084  |
| 1050.4900 | 1400.3176 | 2099.9728 | 4198.9384 | 29 | A          | 3  | 331.1850  | 166.0961  | 111.0665  | 83.5517   |
| 1075.7520 | 1434.0002 | 2150.4967 | 4299.9861 | 30 | T          | 2  | 260.1479  | 130.5776  | 87.3875   | 65.7924   |
|           |           |           |           | 31 | R          | 1  | 159.1002  | 80.0537   | 53.7049   | 40.5305   |

$$z_{11} : \begin{array}{r} 1282.5647 \\ - \quad 90.0014 \\ \hline 1192.5633 \end{array} \quad (\bullet S-CH_2-CO-NH_2)$$

QCVNLTR  
HCD

20201214\_RAD\_PepMap\_50cm\_SpikeFL\_PNGaseF\_Tryp\_GlycoGlycan #9834 RT: 40.05 AV: 1 NL: 4.35E8  
T: FTMS + p NSI d Full ms2 488.2340@hcd28.00 [120.0000-987.0000]

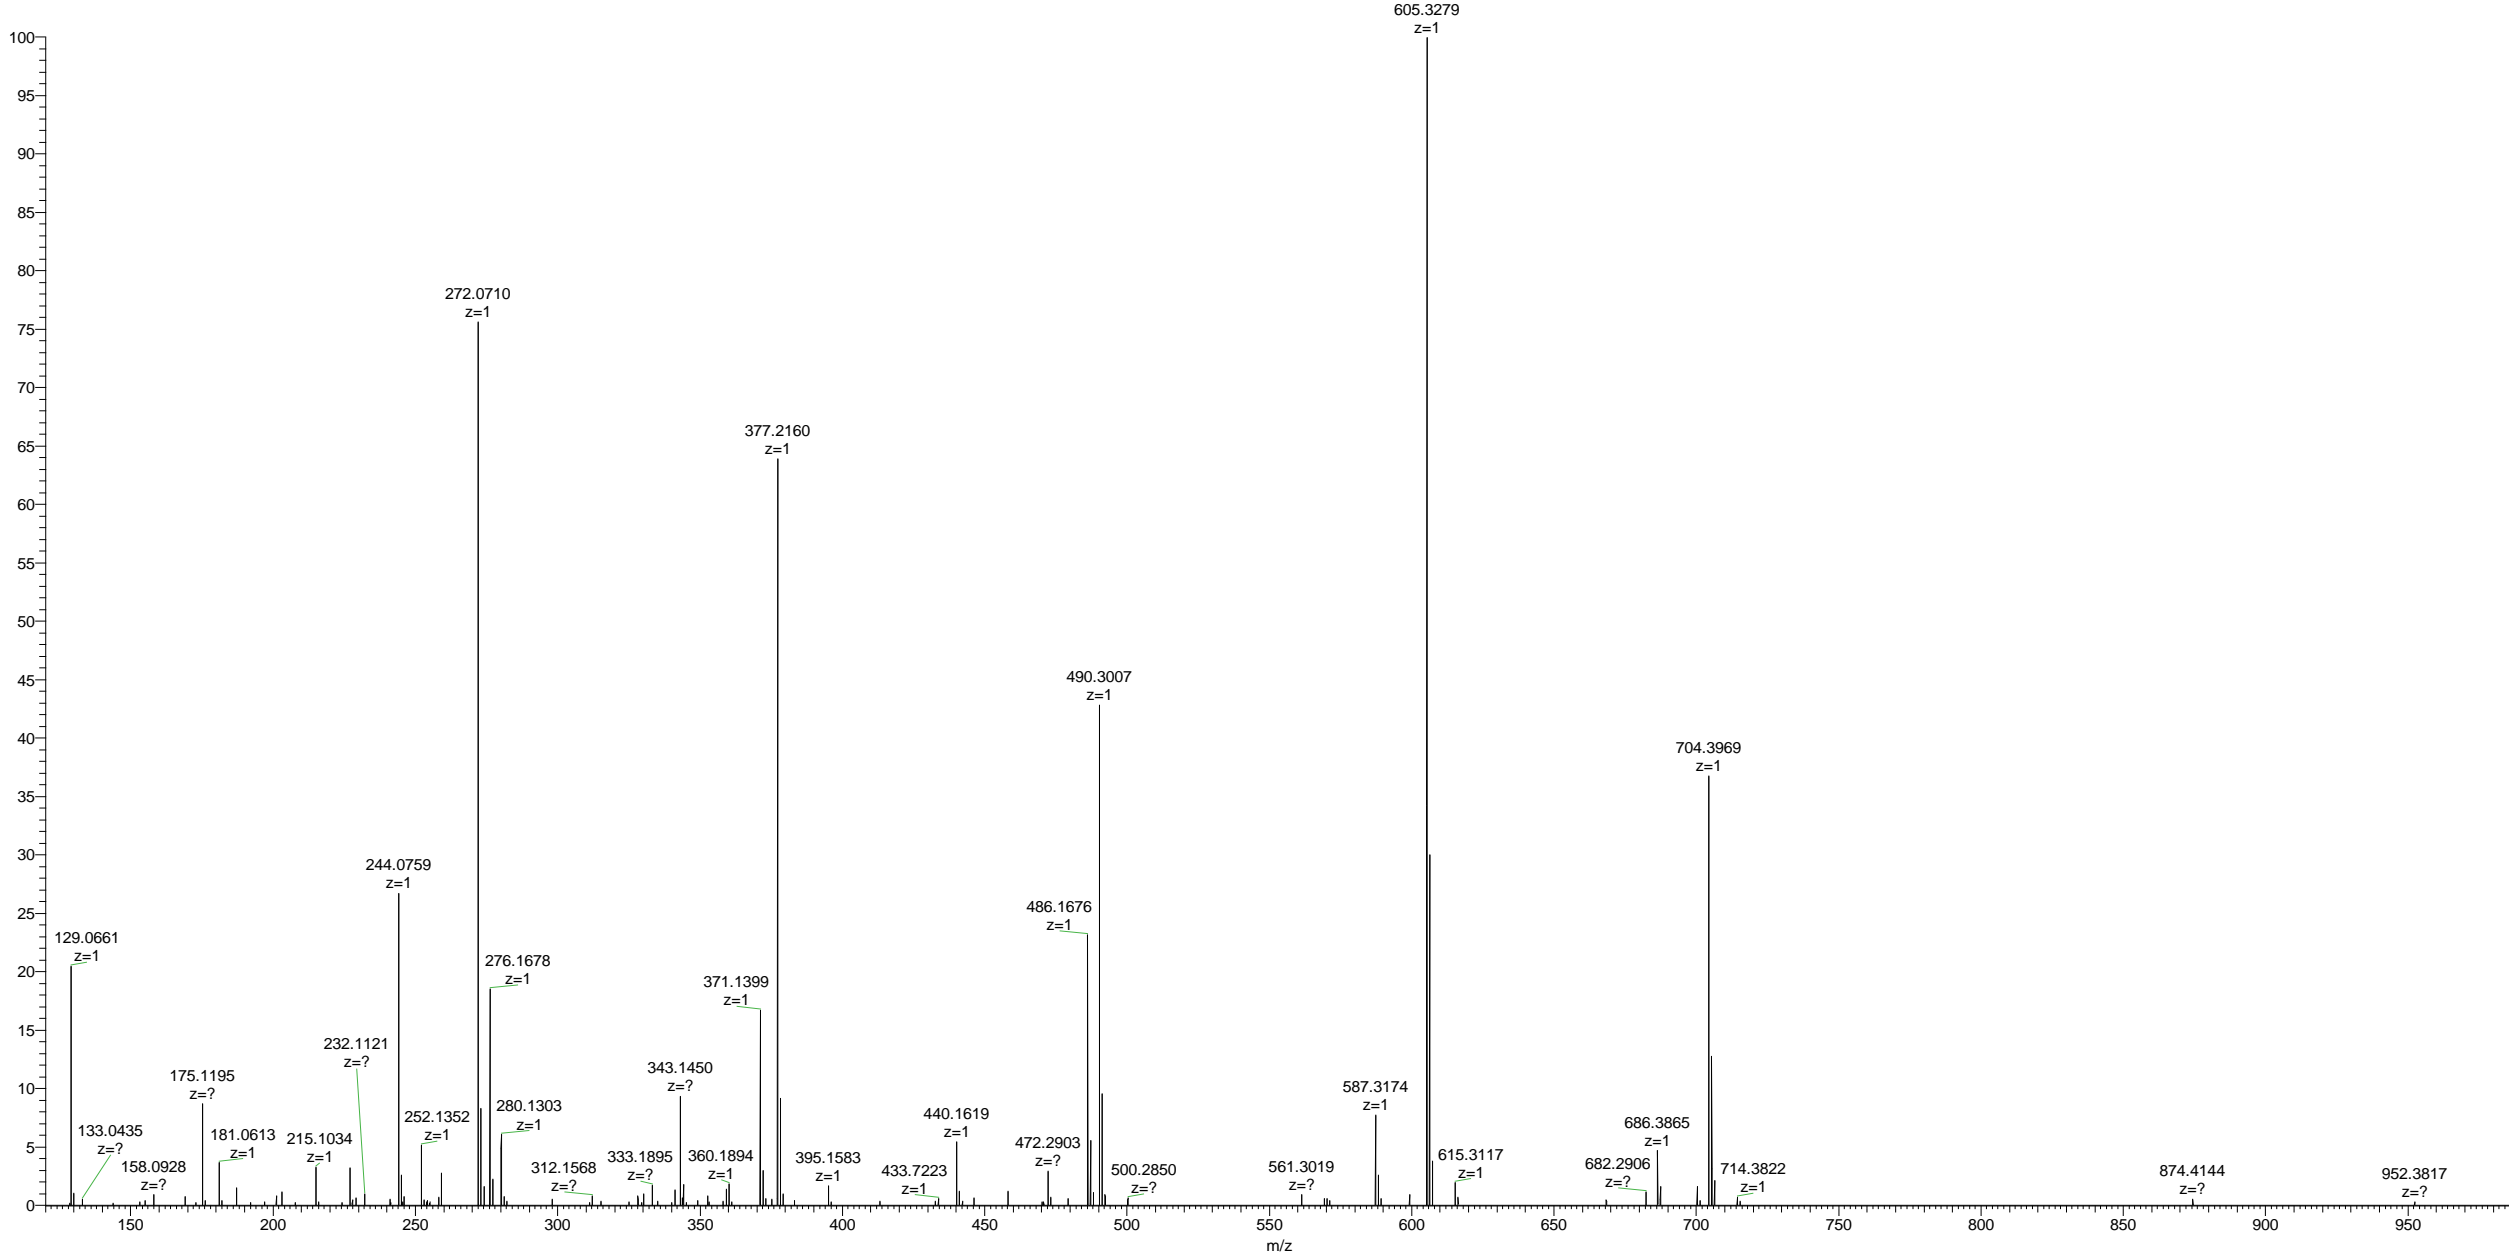

20201214\_RAD\_PepMap\_50cm\_SpikeFL\_PNGaseF\_Tryp\_GlycoGlycan #9834 RT: 40.05 AV: 1 NL: 3.29E8  
T: FTMS + p NSI d Full ms2 488.2340@hcd28.00 [120.0000-987.0000]

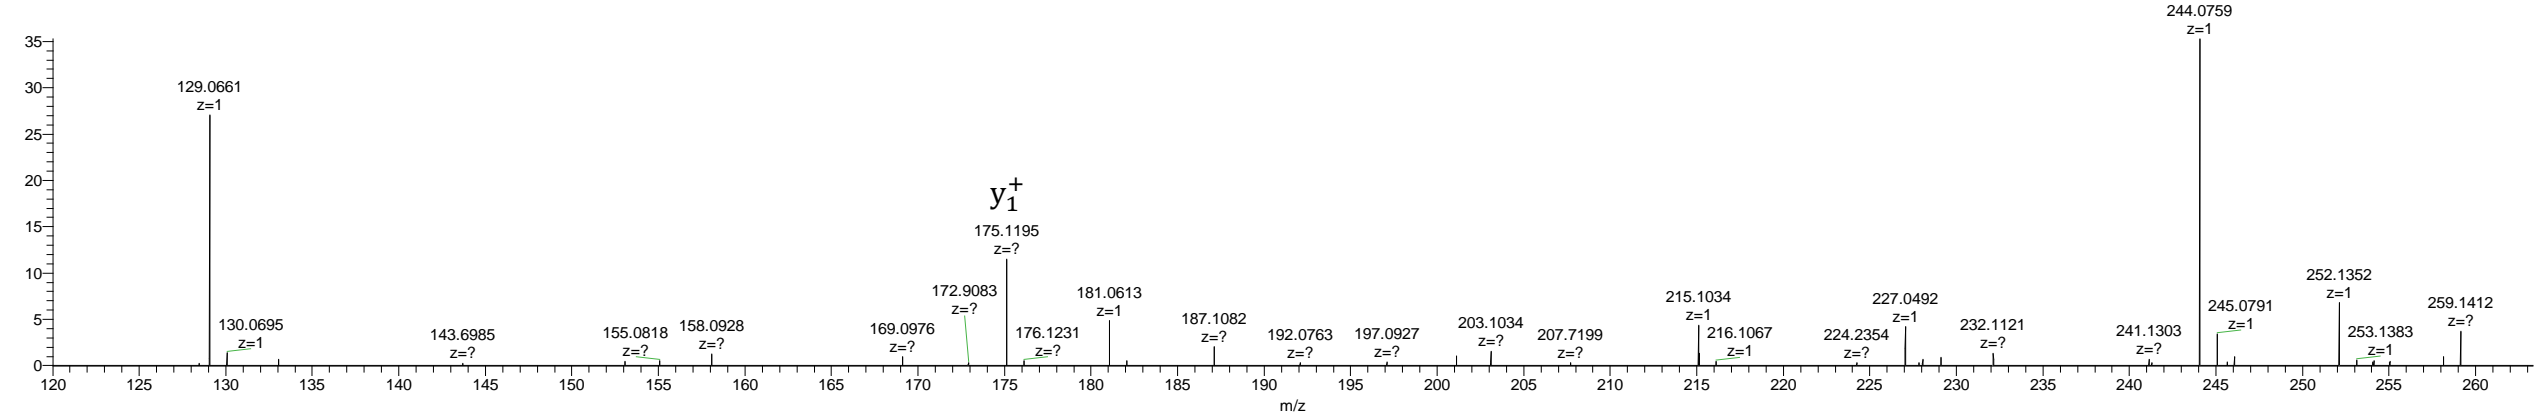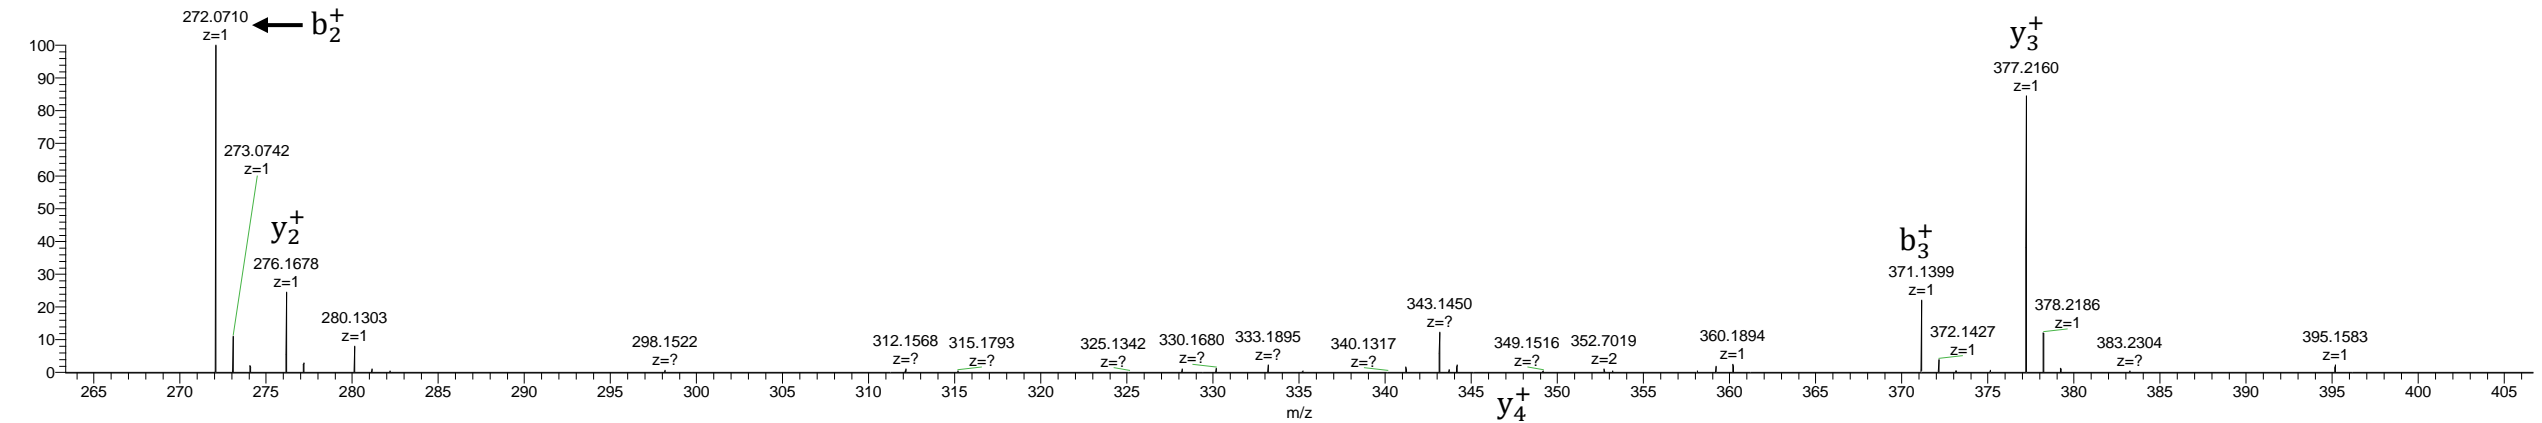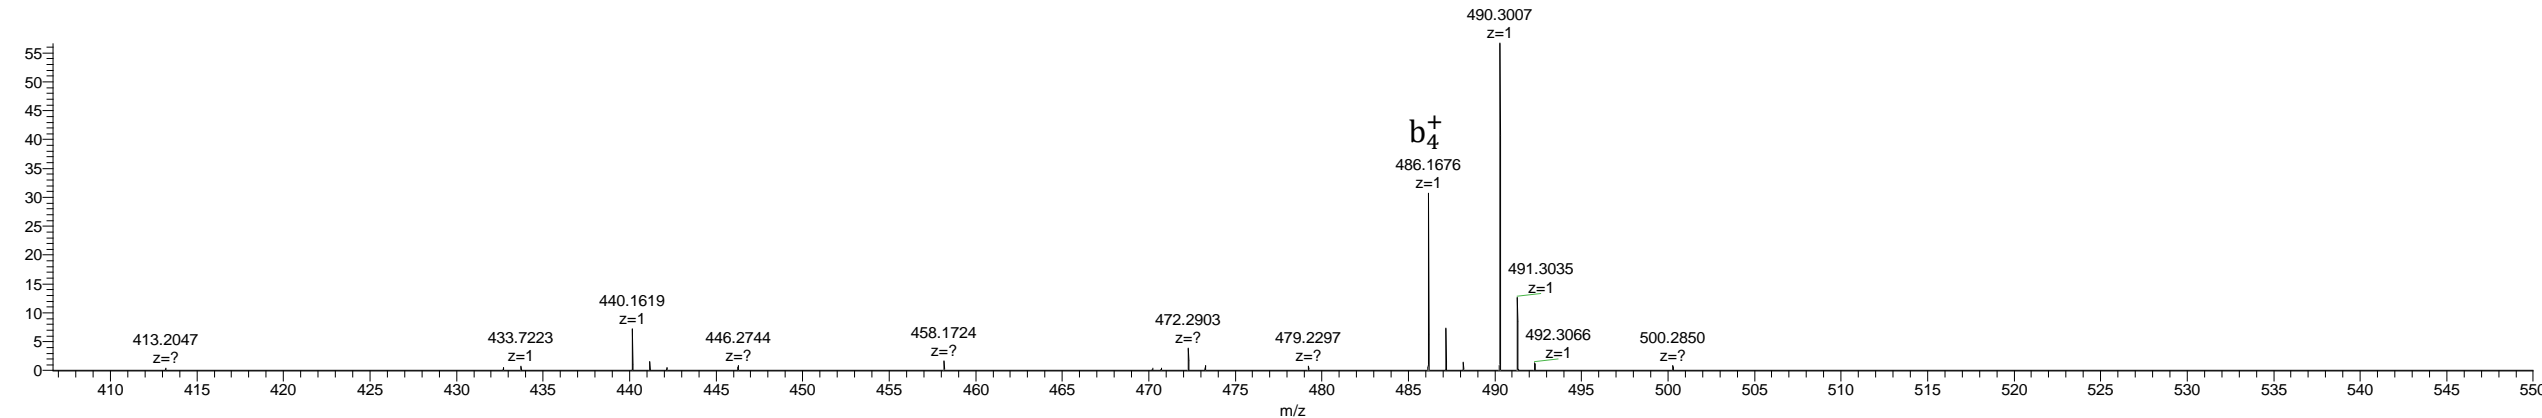

20201214\_RAD\_PepMap\_50cm\_SpikeFL\_PNGaseF\_Tryp\_GlycoGlycan #9834 RT: 40.05 AV: 1 NL: 4.35E8  
T: FTMS + p NSI d Full ms2 488.2340@hcd28.00 [120.0000-987.0000]

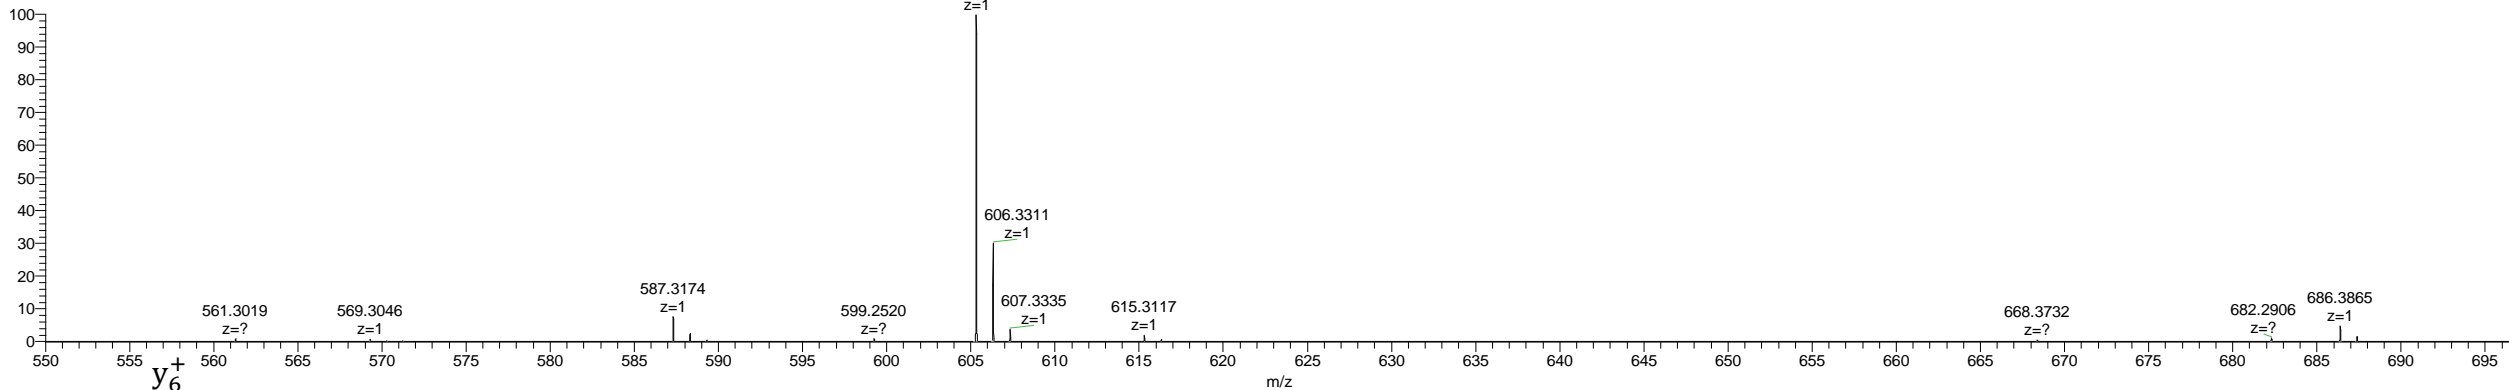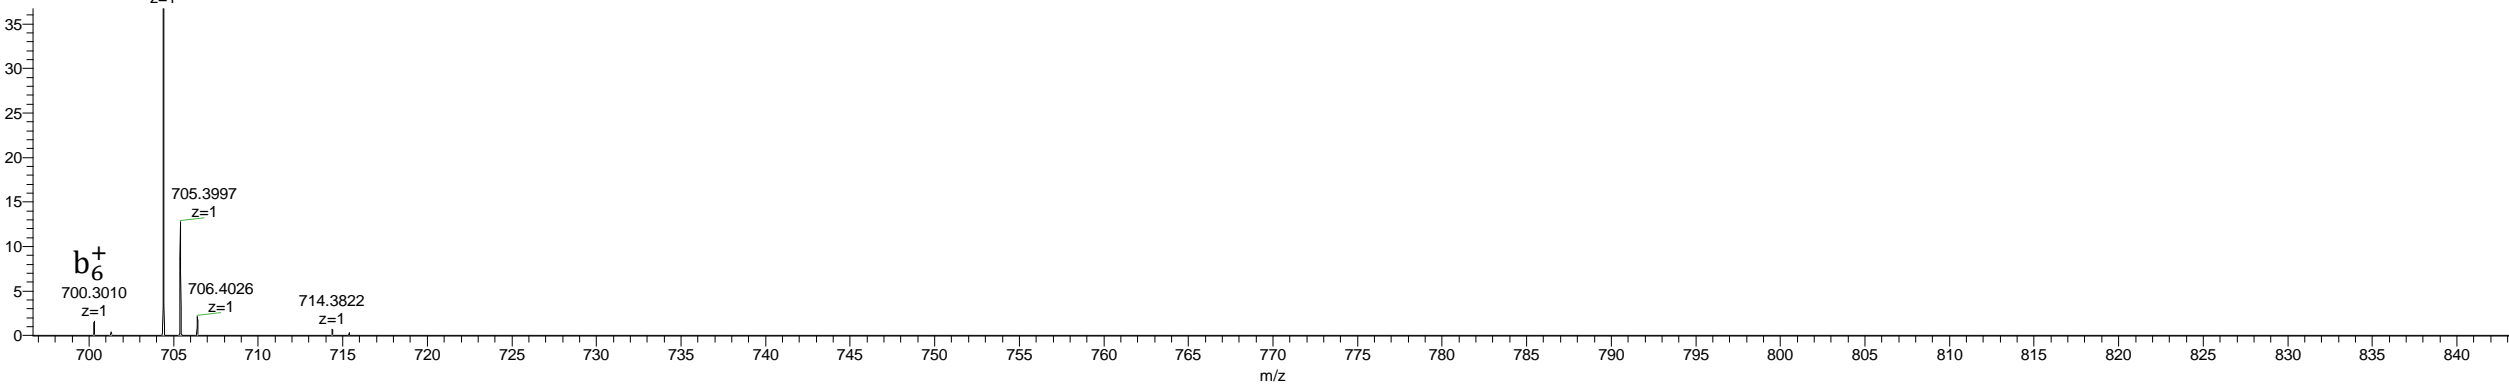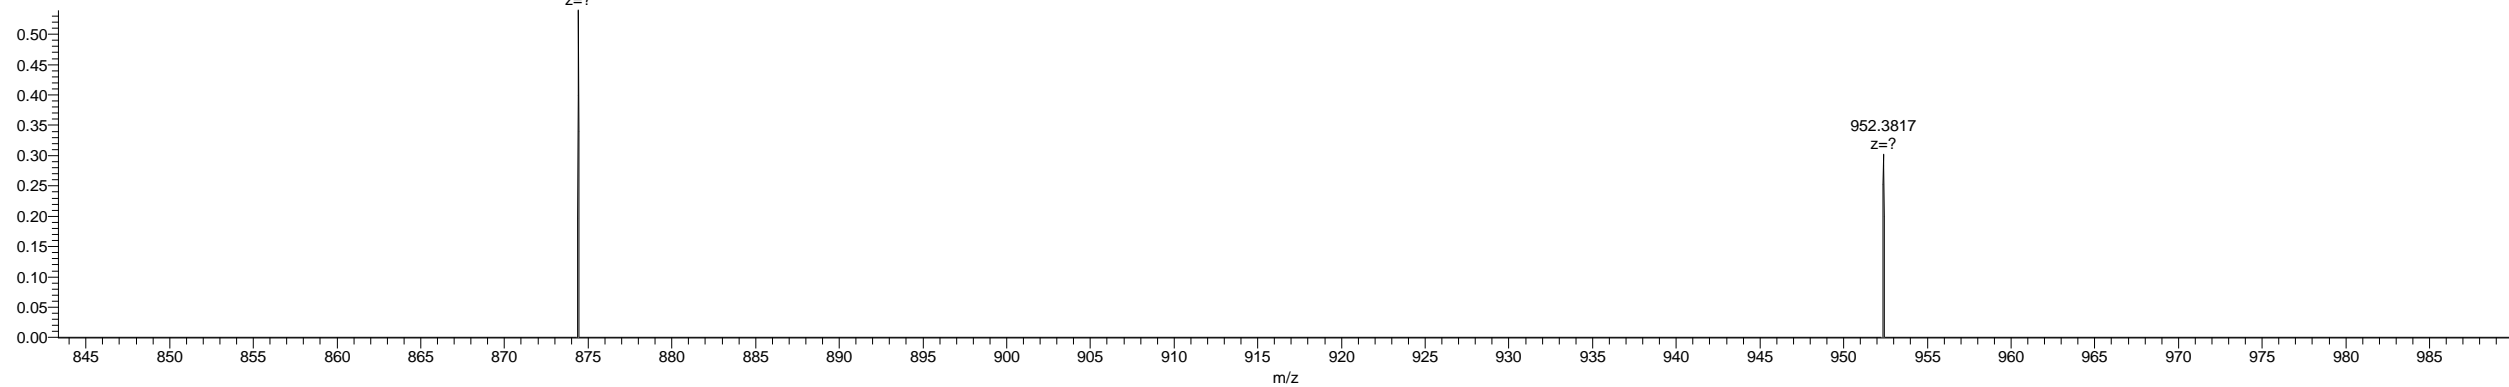



| <b>b+</b> |   | <b>AA</b>      |   | <b>y+</b> |
|-----------|---|----------------|---|-----------|
| 112.0393  | 1 | Q<br>(pyroGlu) | 8 |           |
| 272.0700  | 2 | C              | 7 | 864.4244  |
| 371.1384  | 3 | V              | 6 | 704.3937  |
| 486.1653  | 4 | N (deam)       | 5 | 605.3253  |
| 599.2494  | 5 | L              | 4 | 490.2984  |
| 700.2971  | 6 | T              | 3 | 377.2143  |
| 801.3447  | 7 | T              | 2 | 276.1666  |
|           | 8 | R              | 1 | 175.1190  |

QCVNLTR  
ETD

20201214\_RAD\_PepMap\_50cm\_SpikeFL\_PNGaseF\_Tryp\_ETD #11777 RT: 39.98 AV: 1 NL: 3.67E8  
T: FTMS + c NSI d Full ms2 488.2333@etd104.58 [110.0000-987.0000]

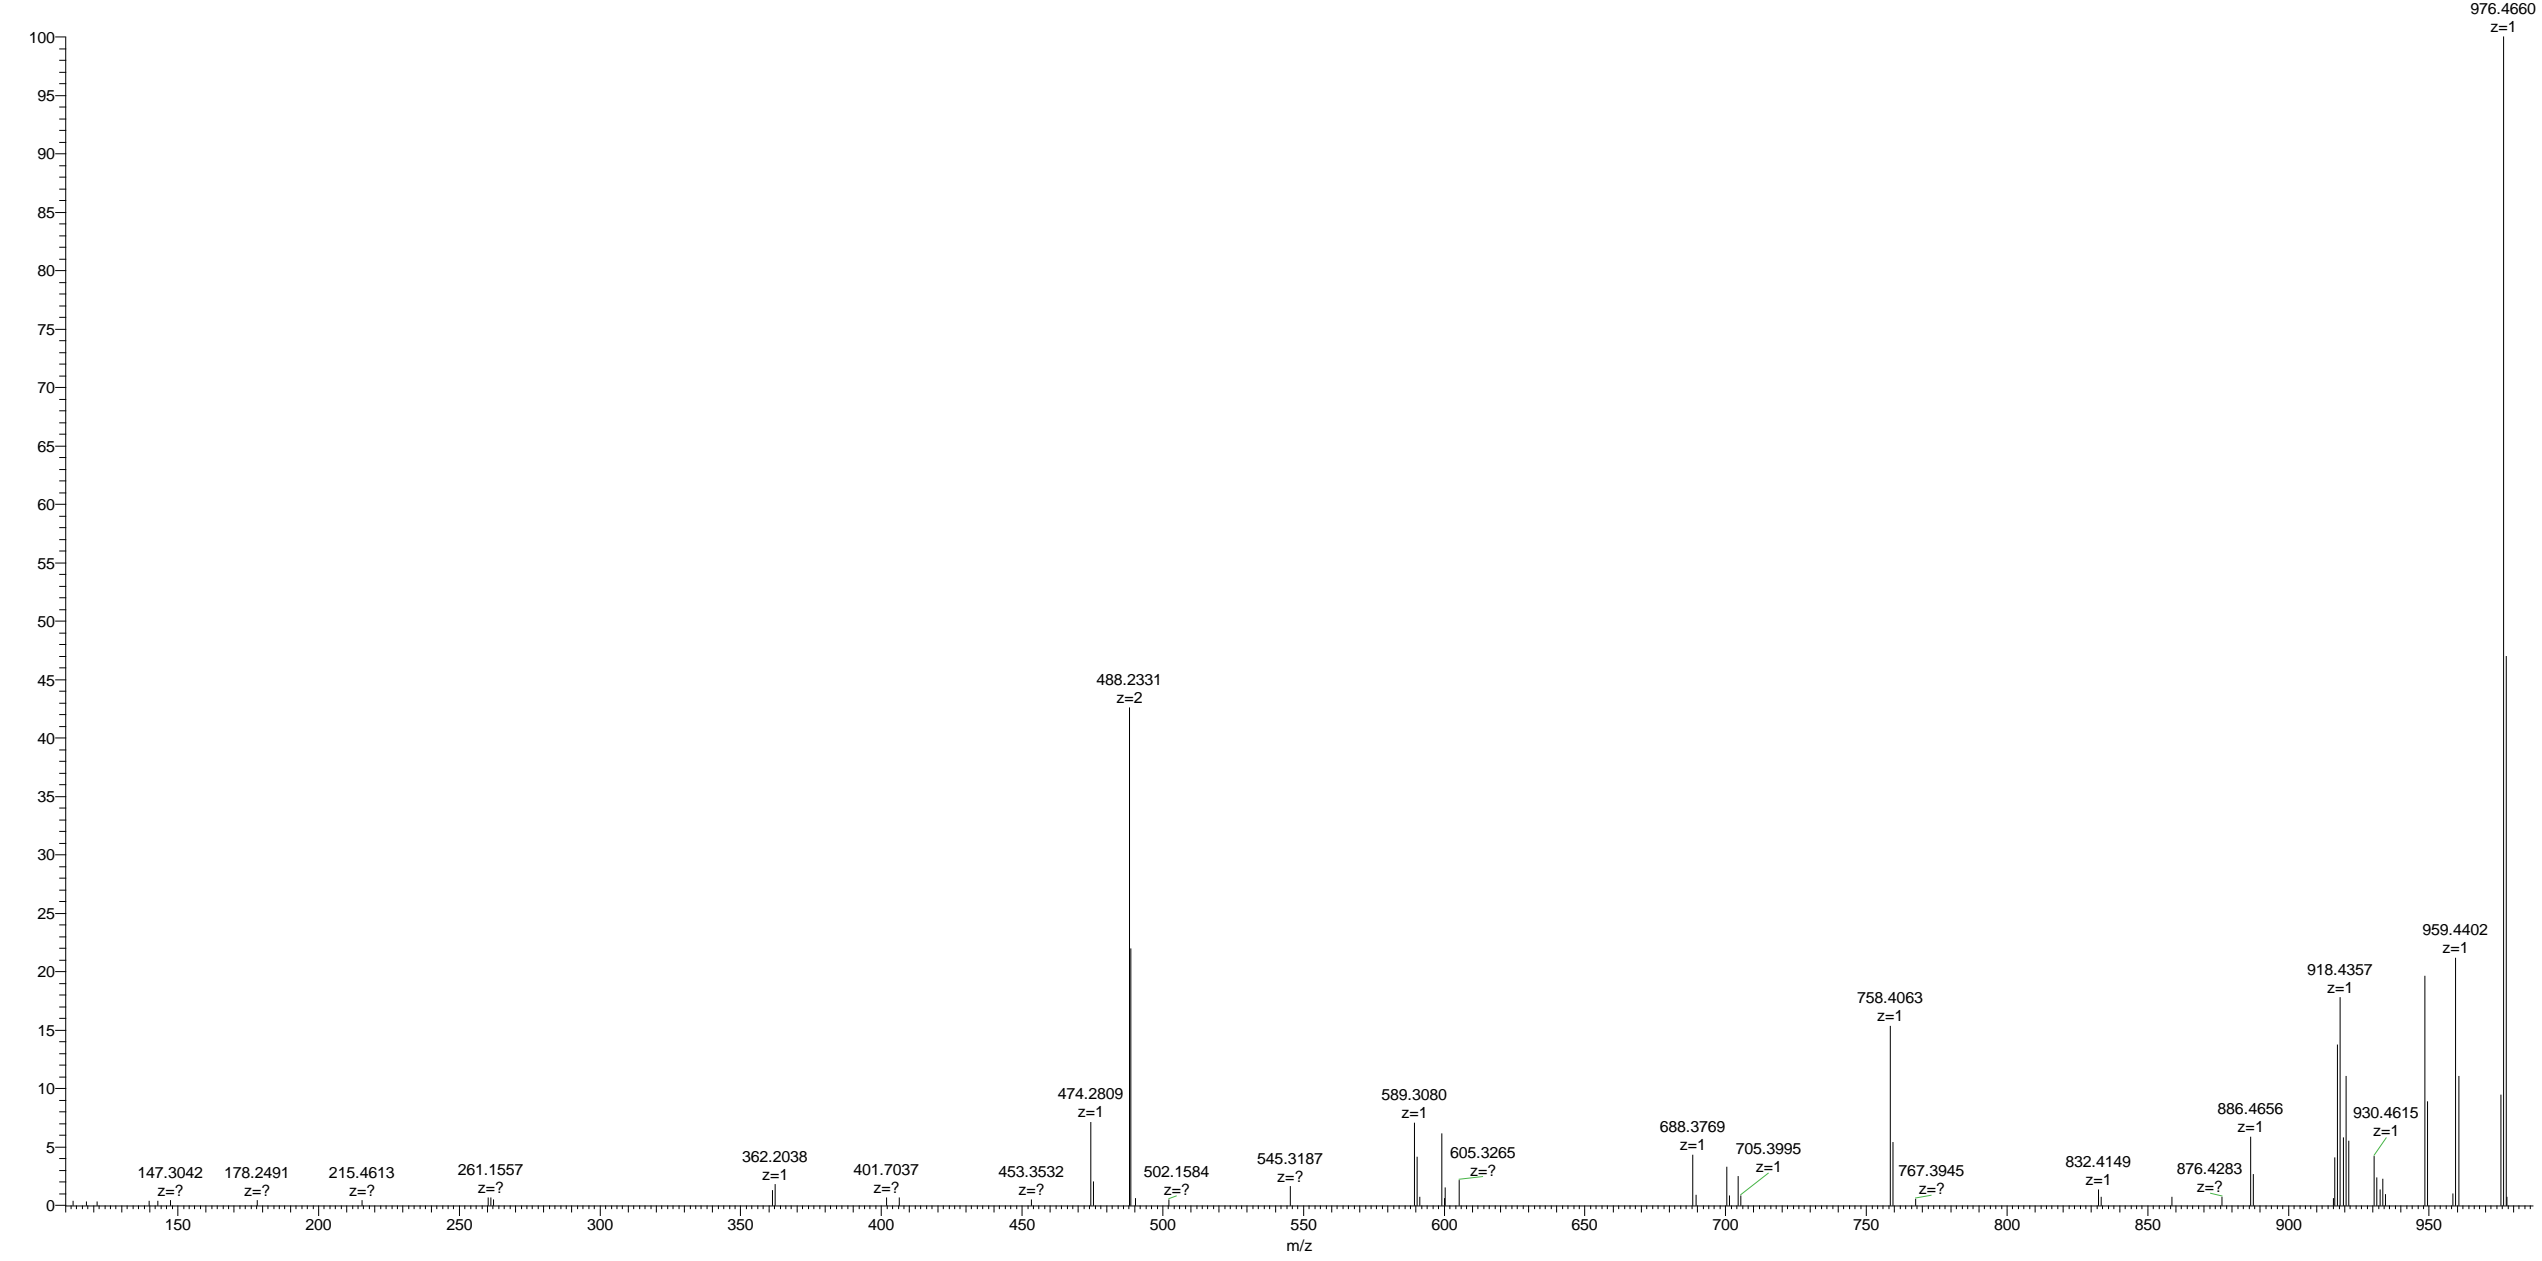

20201214\_RAD\_PepMap\_50cm\_SpikeFL\_PNGaseF\_Tryp\_ETD #11777 RT: 39.98 AV: 1 NL: 1.57E8  
T: FTMS + c NSI d Full ms2 488.2333@etd104.58 [110.0000-987.0000]

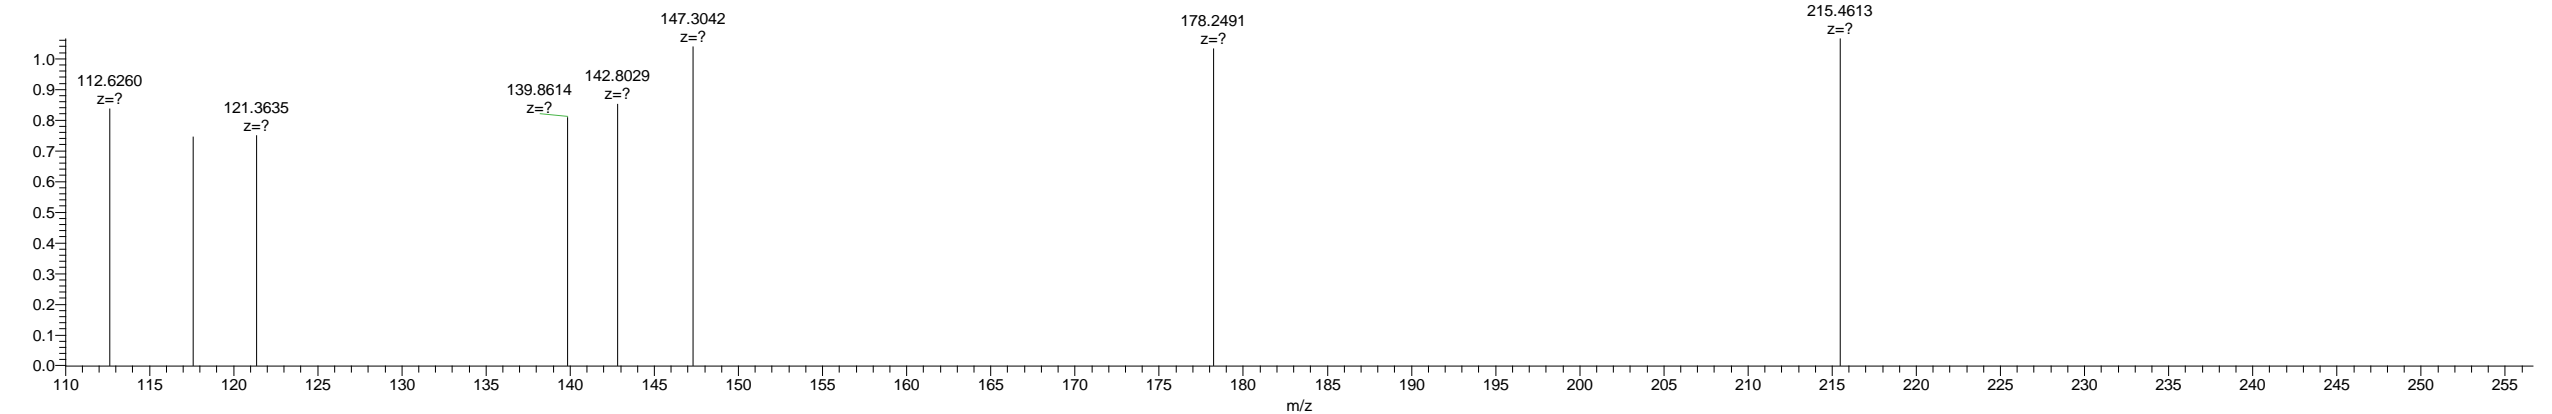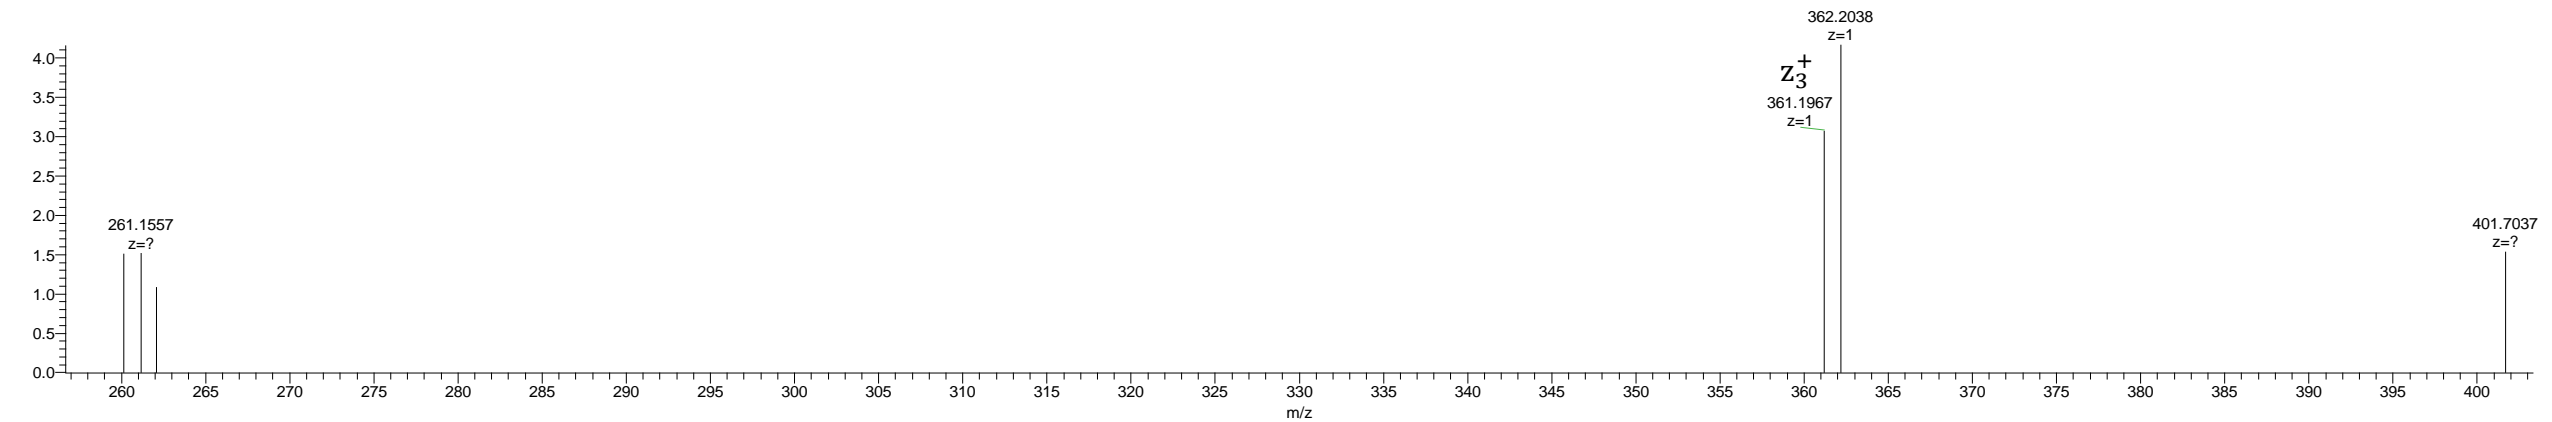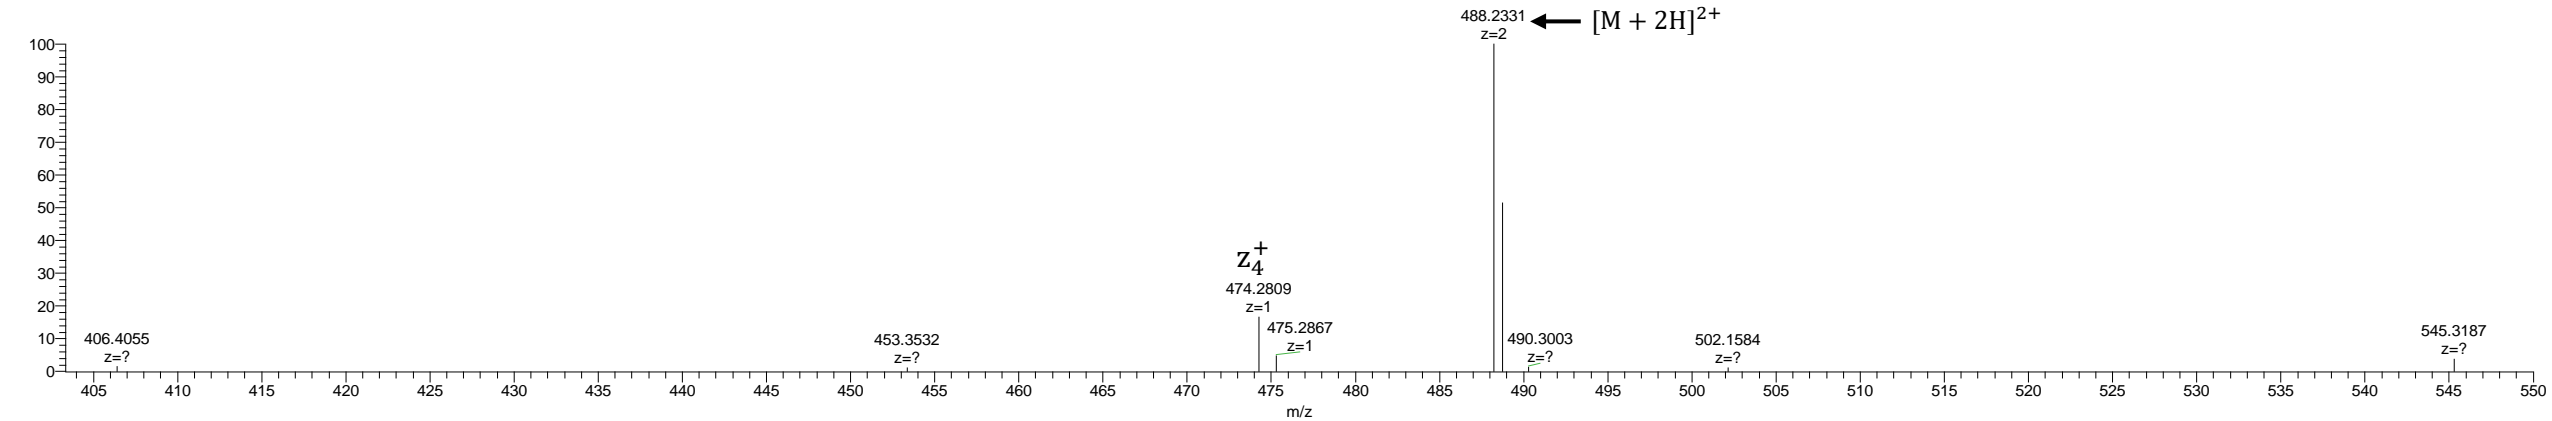

20201214\_RAD\_PepMap\_50cm\_SpikeFL\_PNGaseF\_Tryp\_ETD #11777 RT: 39.98 AV: 1 NL: 3.67E8  
T: FTMS + c NSI d Full ms2 488.2333@etd104.58 [110.0000-987.0000]

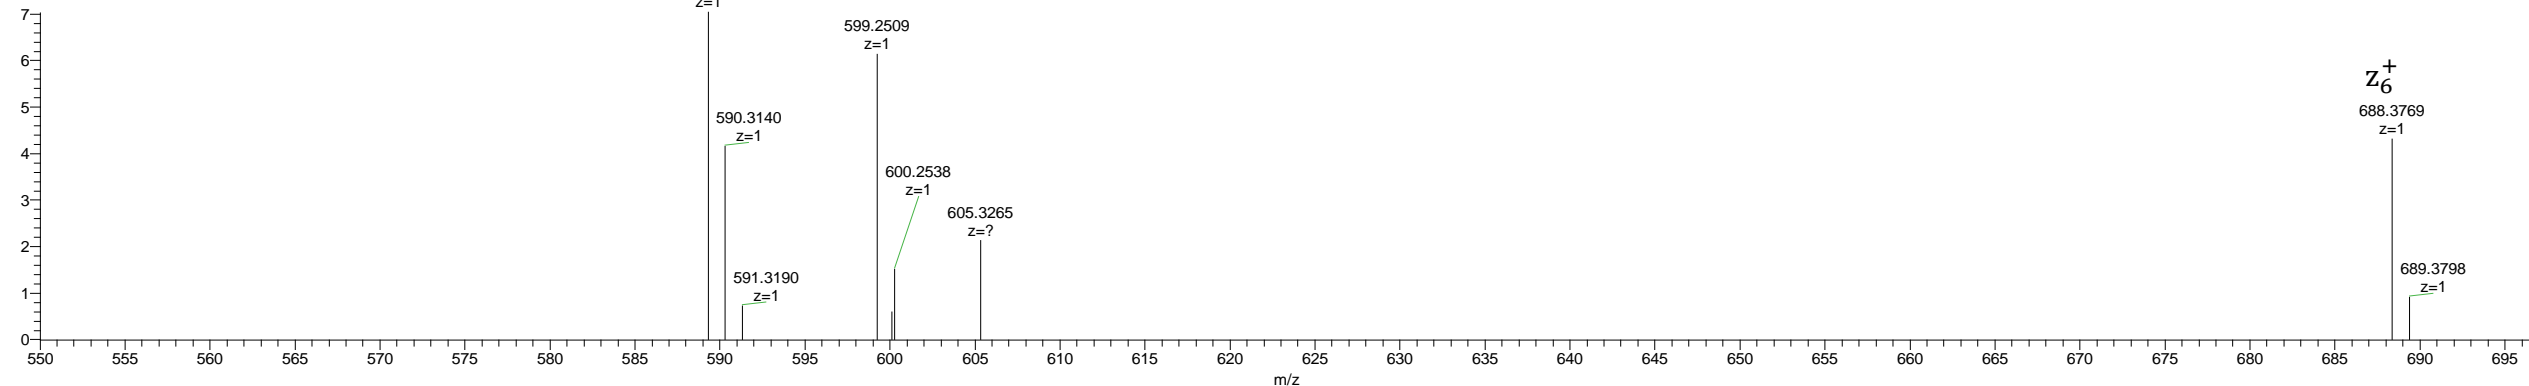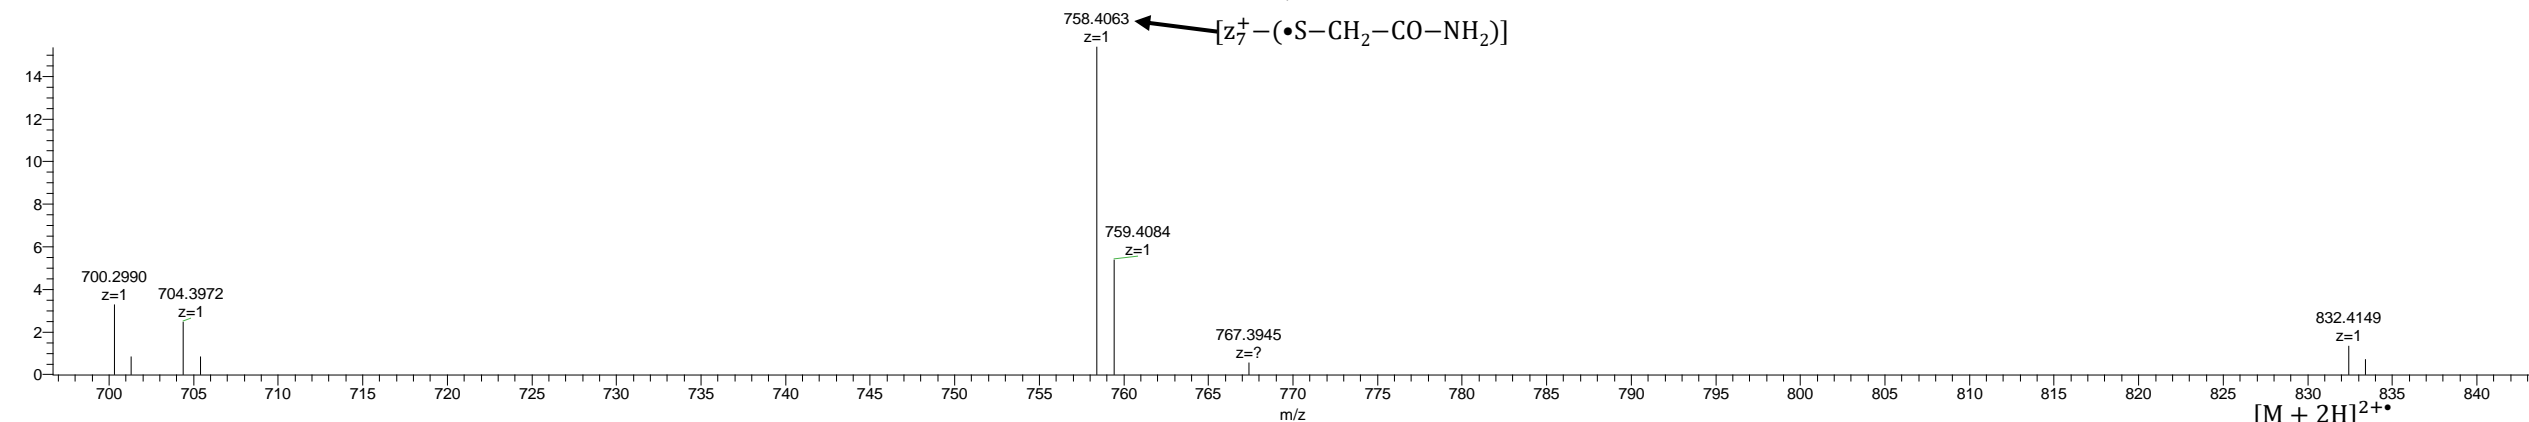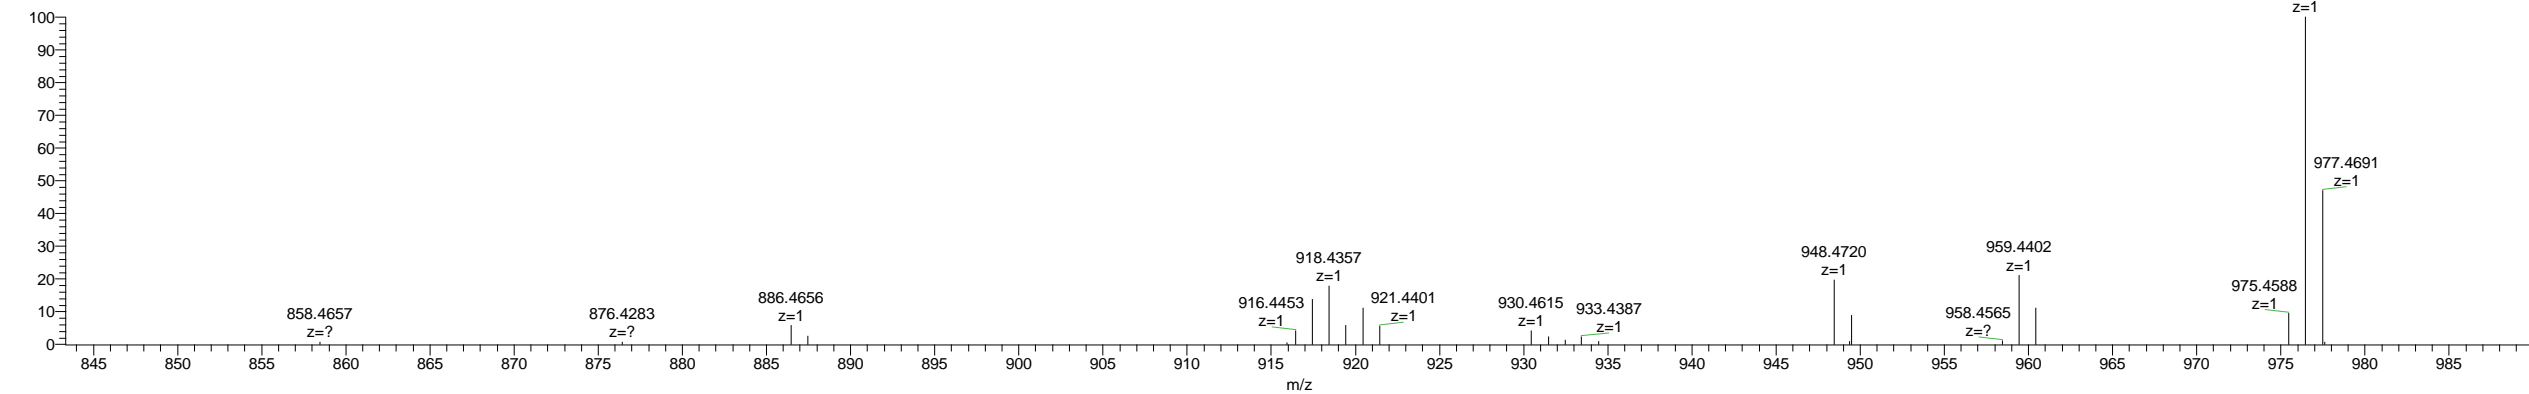

| C+       |   | AA             |   | Z++      |
|----------|---|----------------|---|----------|
| 146.0924 | 1 | Q<br>(pyroGlu) | 8 |          |
| 306.1231 | 2 | C              | 7 | 848.4057 |
| 405.1915 | 3 | V              | 6 | 688.3750 |
| 520.2184 | 4 | N (deam)       | 5 | 589.3066 |
| 633.3025 | 5 | L              | 4 | 474.2796 |
| 734.3502 | 6 | T              | 3 | 361.1956 |
| 835.3978 | 7 | T              | 2 | 260.1479 |
|          | 8 | R              | 1 | 159.1002 |

$$\begin{array}{r}
 Z_7 : \quad 848.4057 \\
 - \quad 90.0014 \\
 \hline
 758.4043
 \end{array}
 \quad (\bullet S-CH_2-CO-NH_2)$$

FRVQPTESIVRFPNITNLCPFGEVFNATR  
EThcD

20210129\_RAD\_PepMap\_50cm\_M96\_PlusPNGaseF\_Tryp\_EThcD #31676 RT: 100.33 AV: 1 NL: 4.00E5  
T: FTMS + c NSI da Full ms2 873.2172@etd16.45 873.2172@hcd15.00 [110.0000-2000.0000]

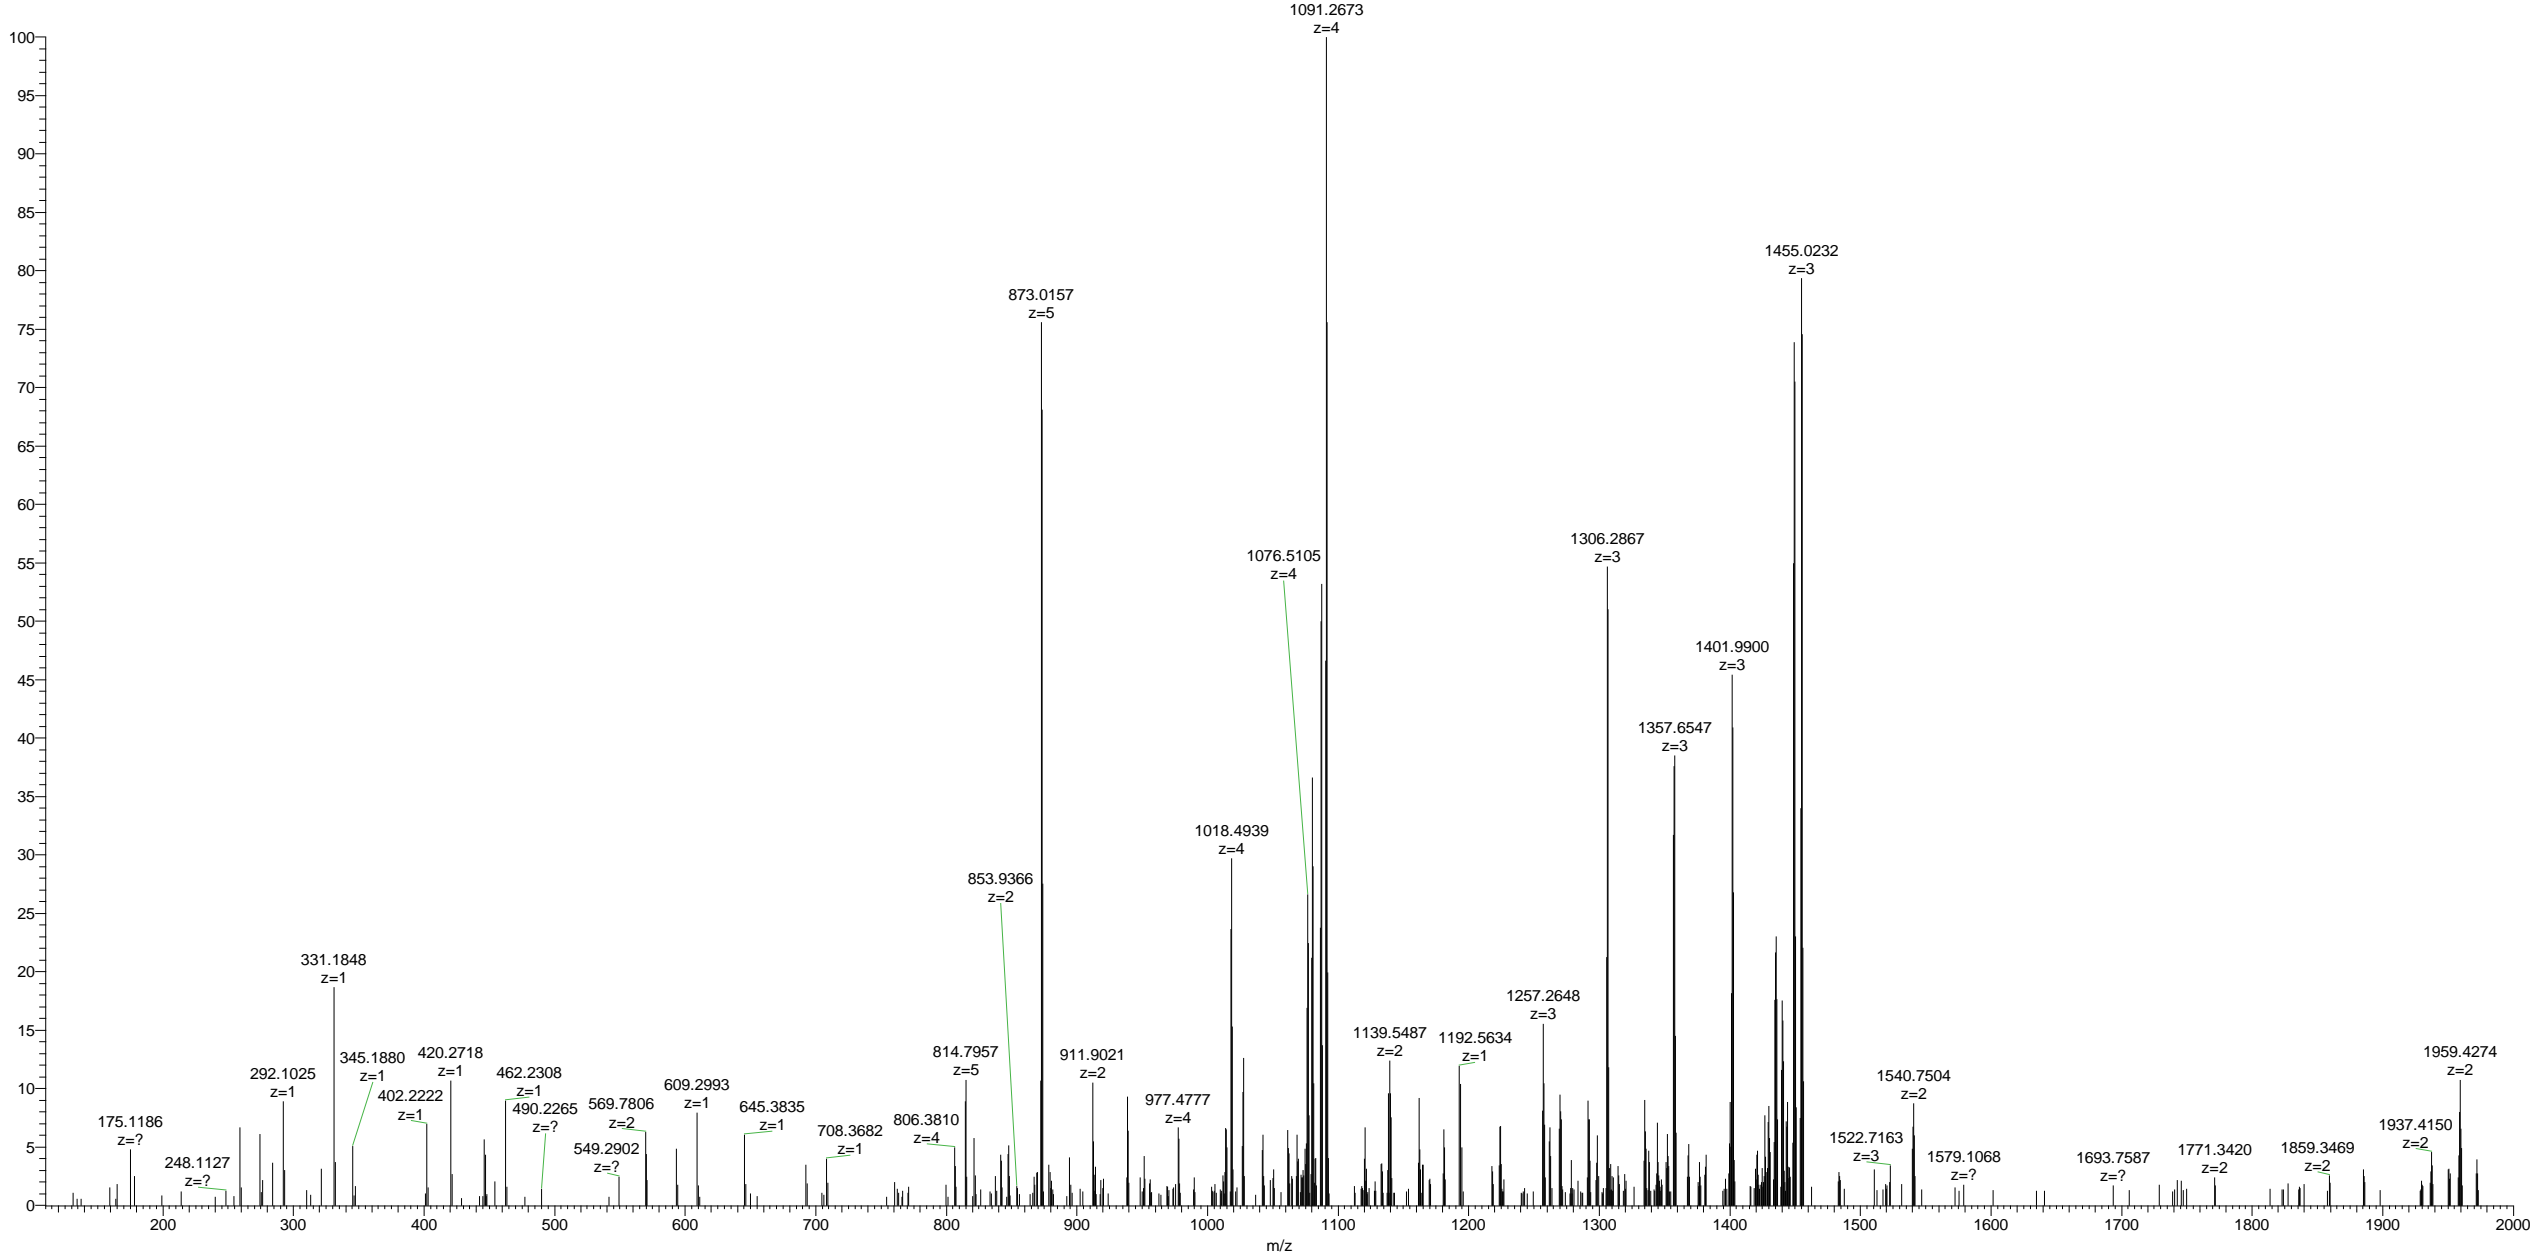

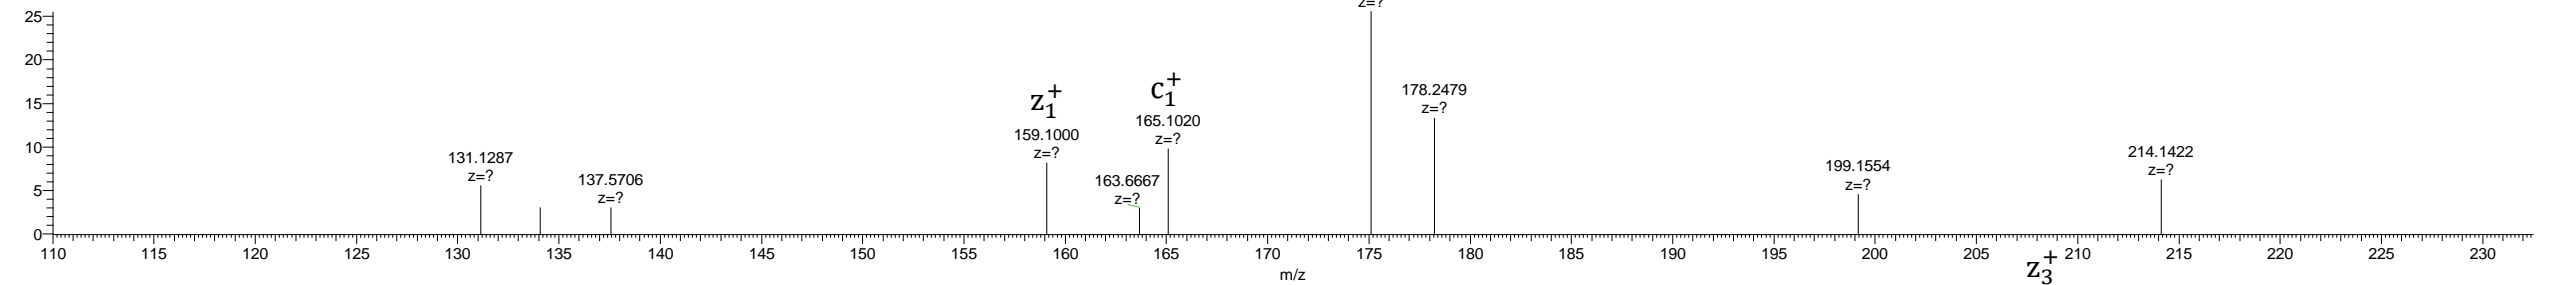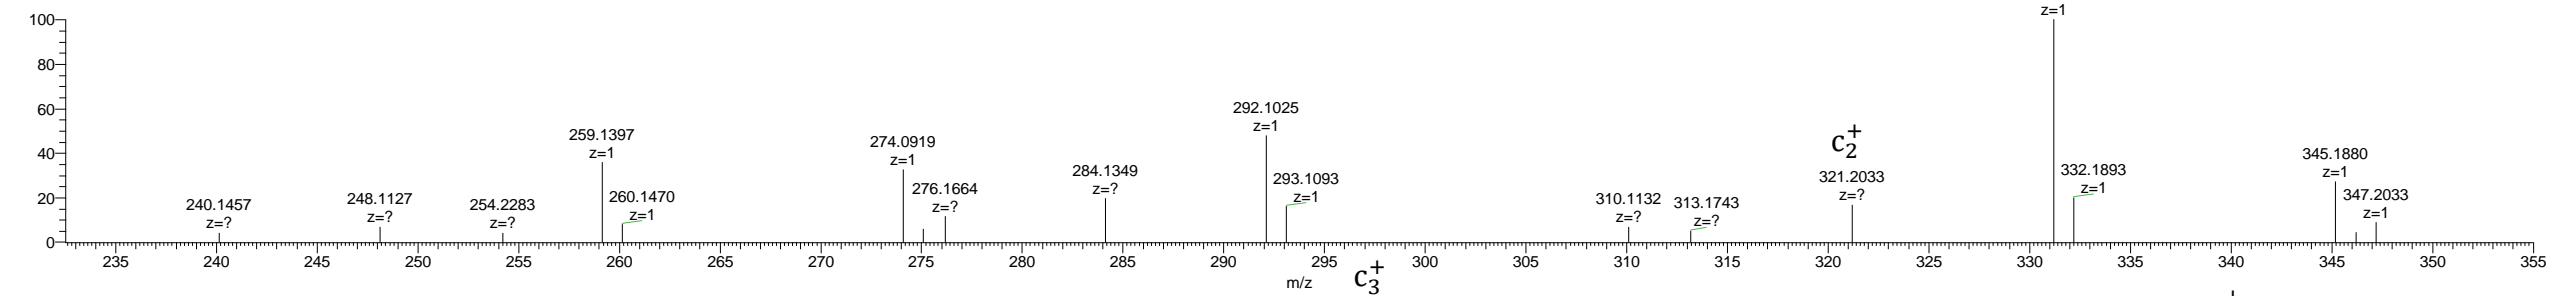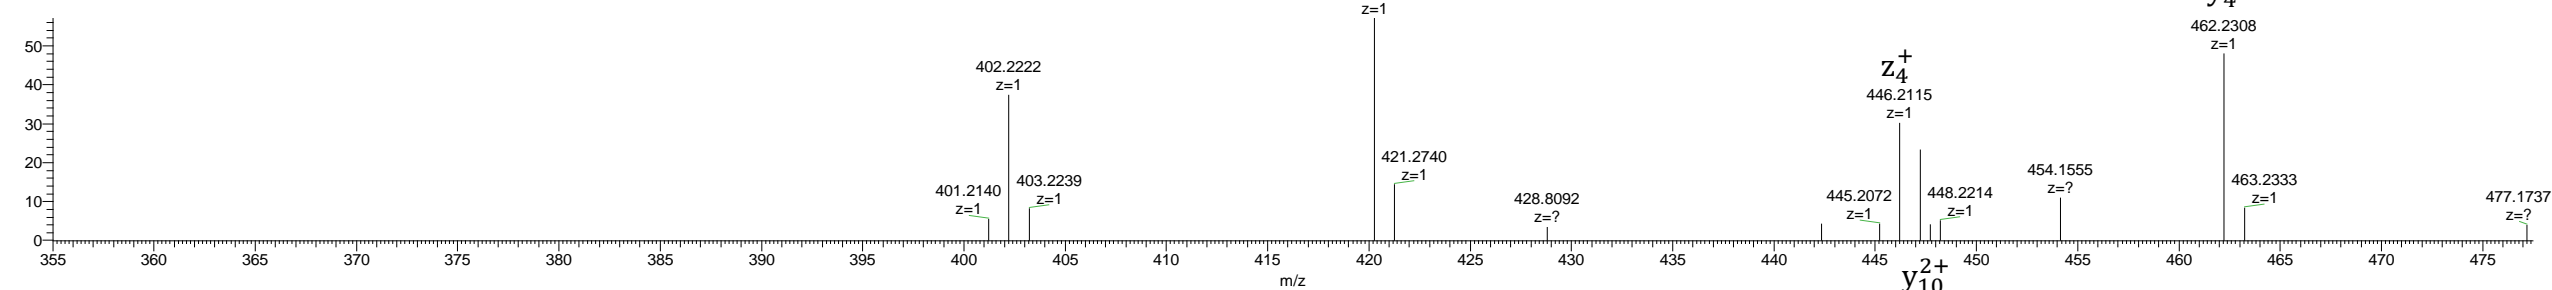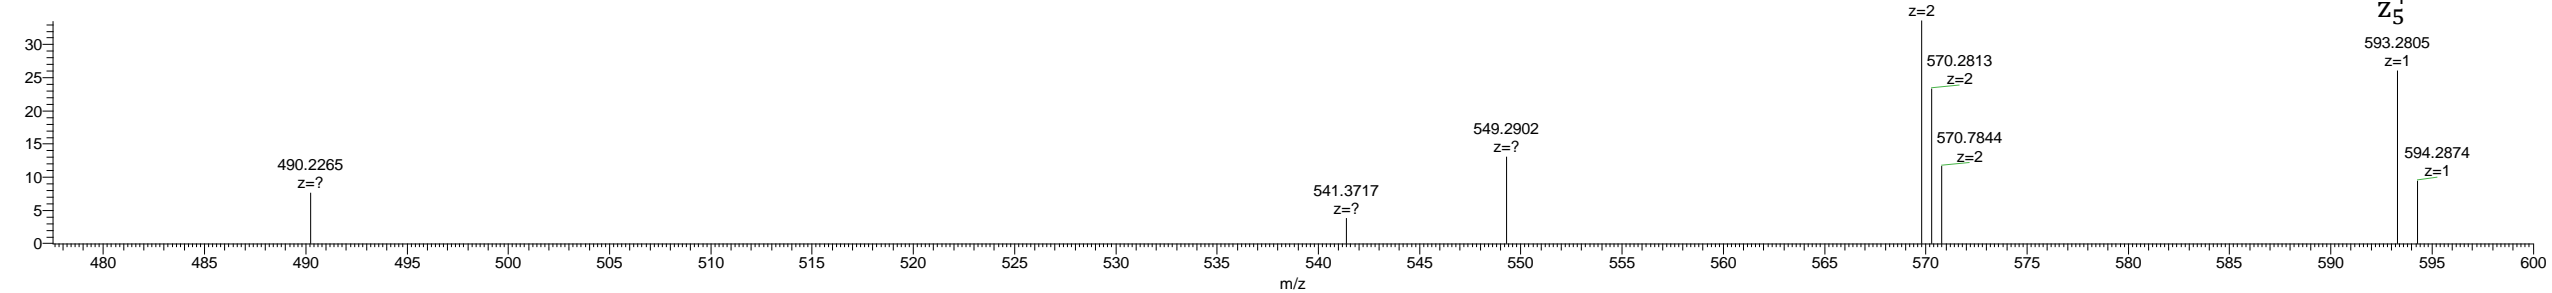

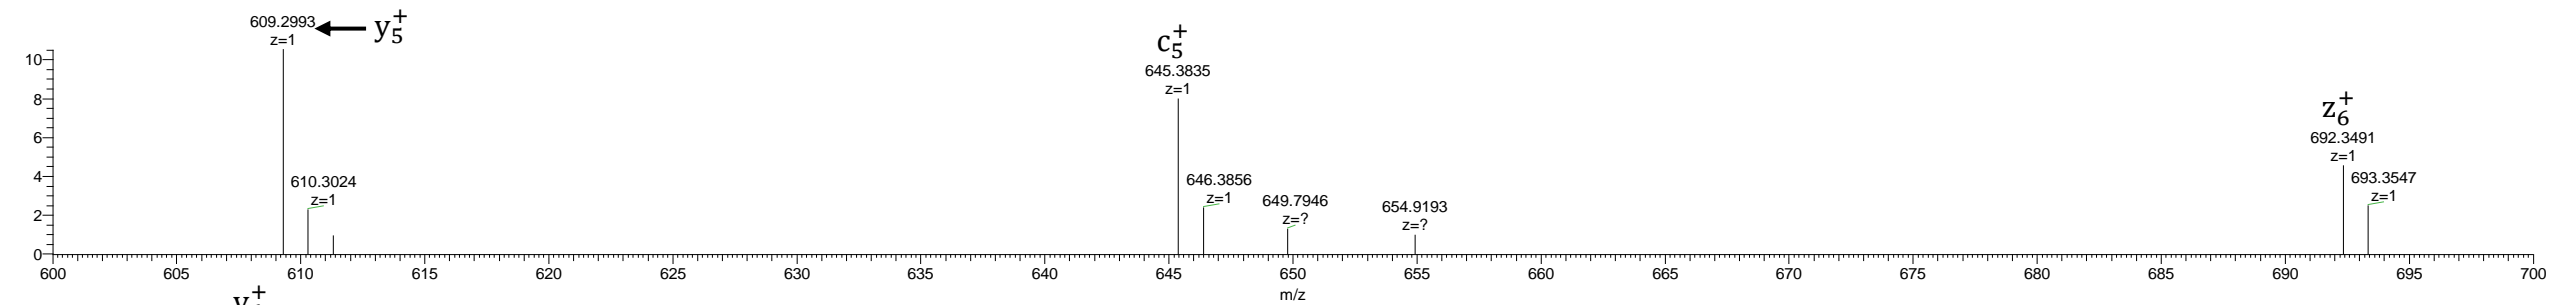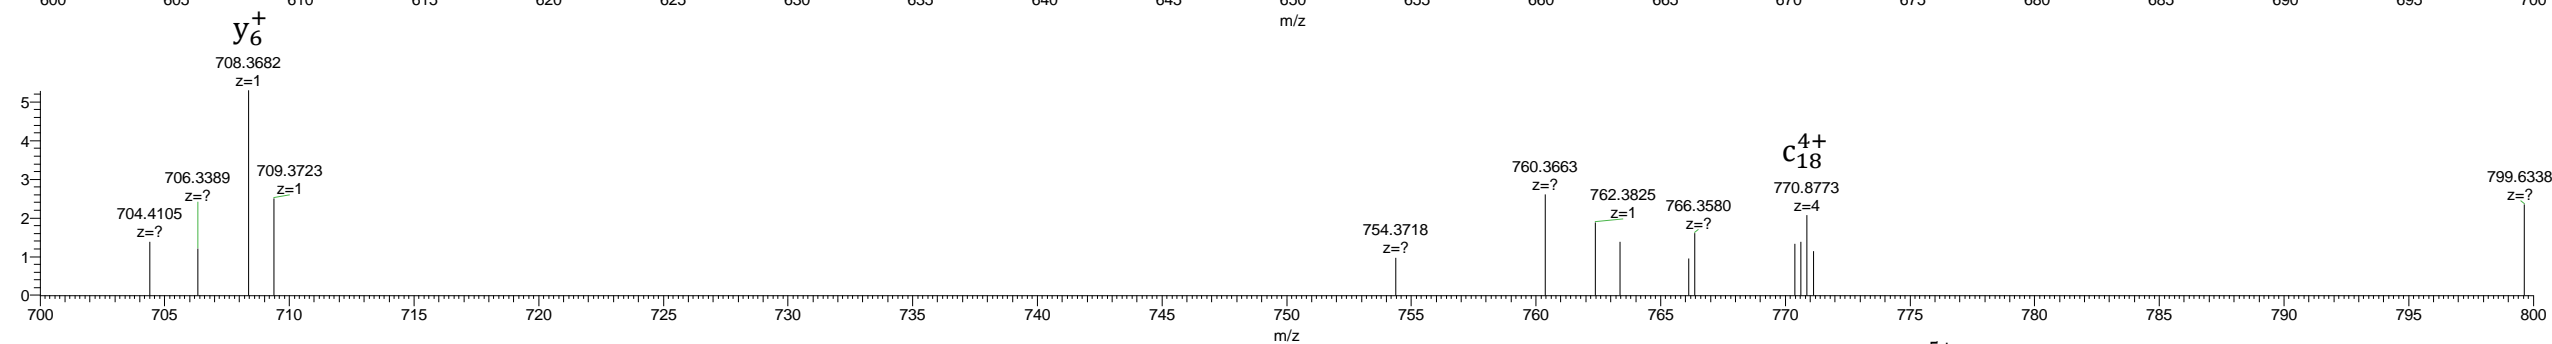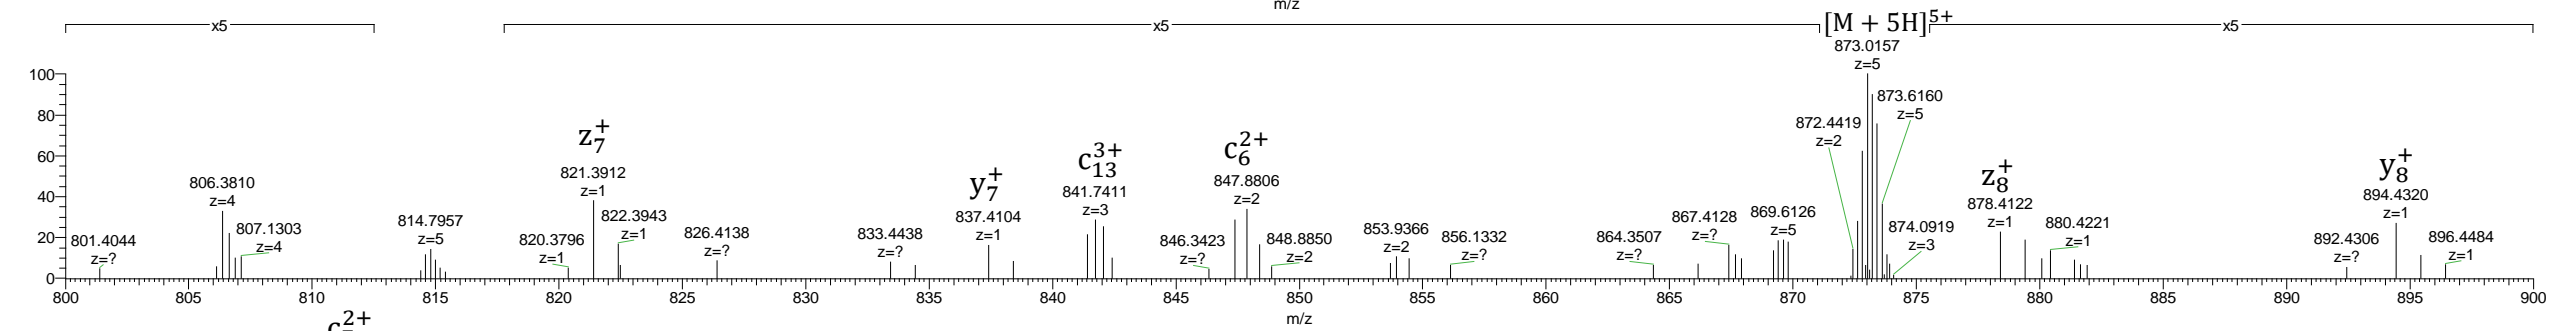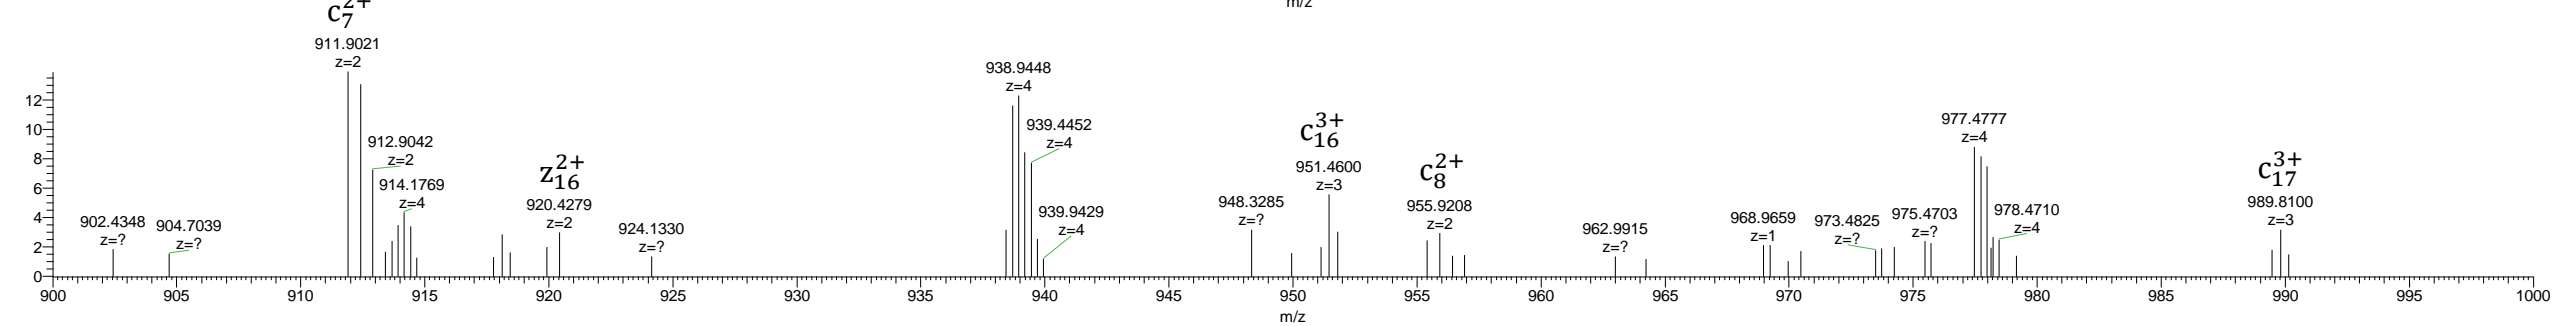



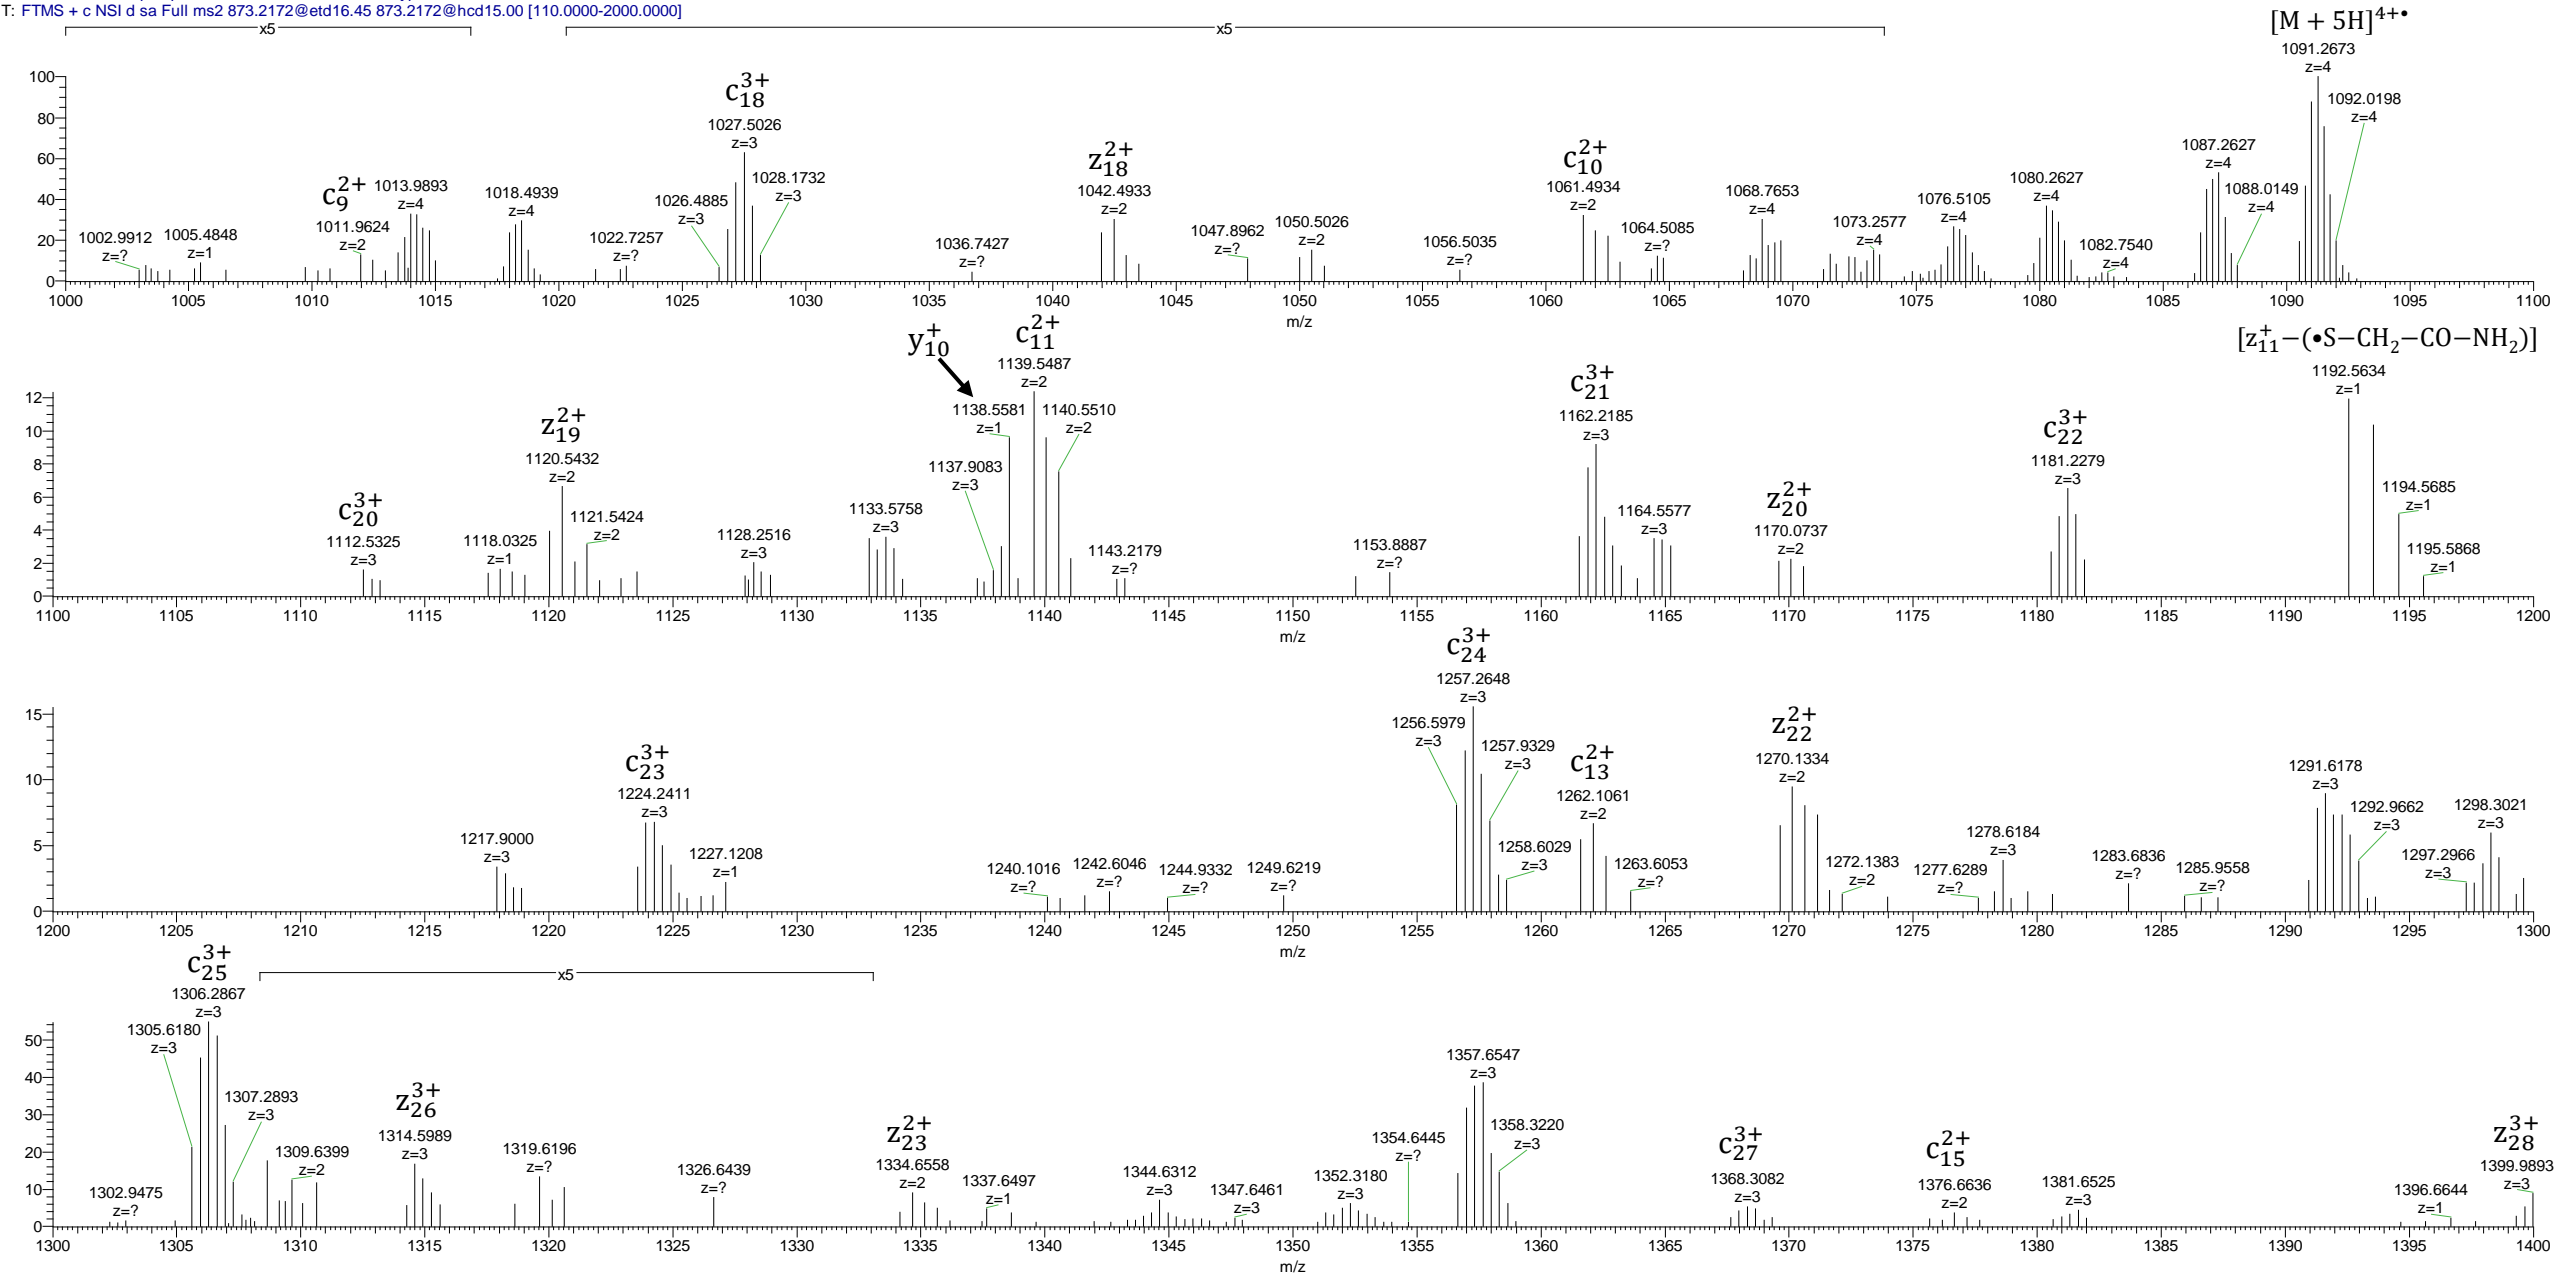

$[M + 5H]^{3+}$

x5

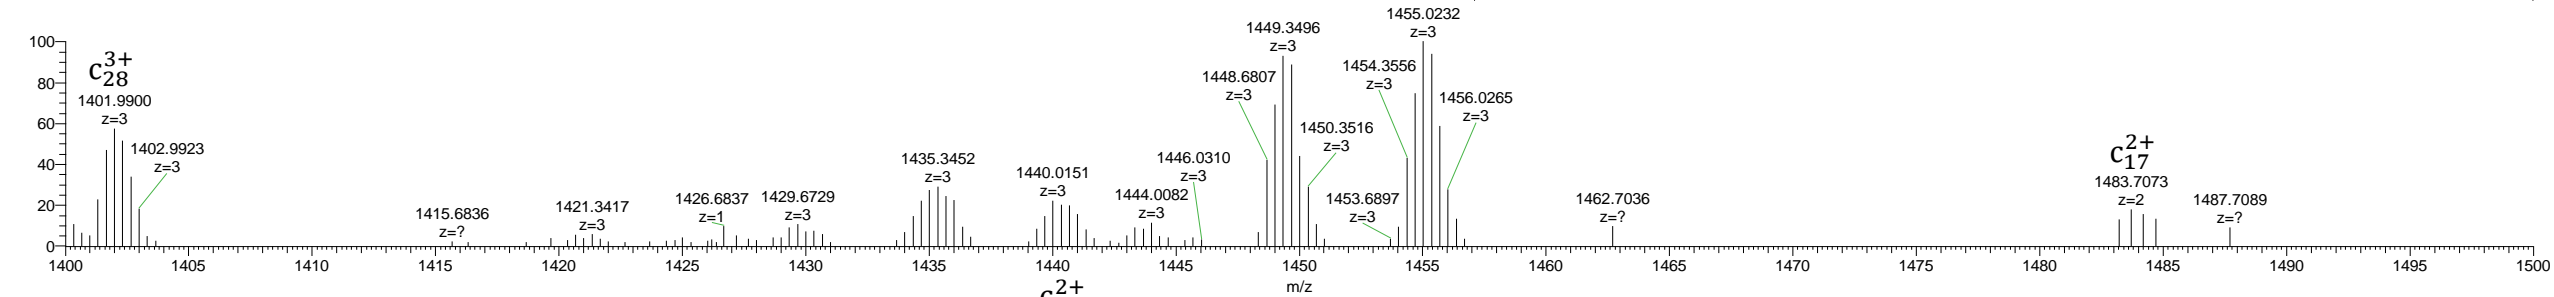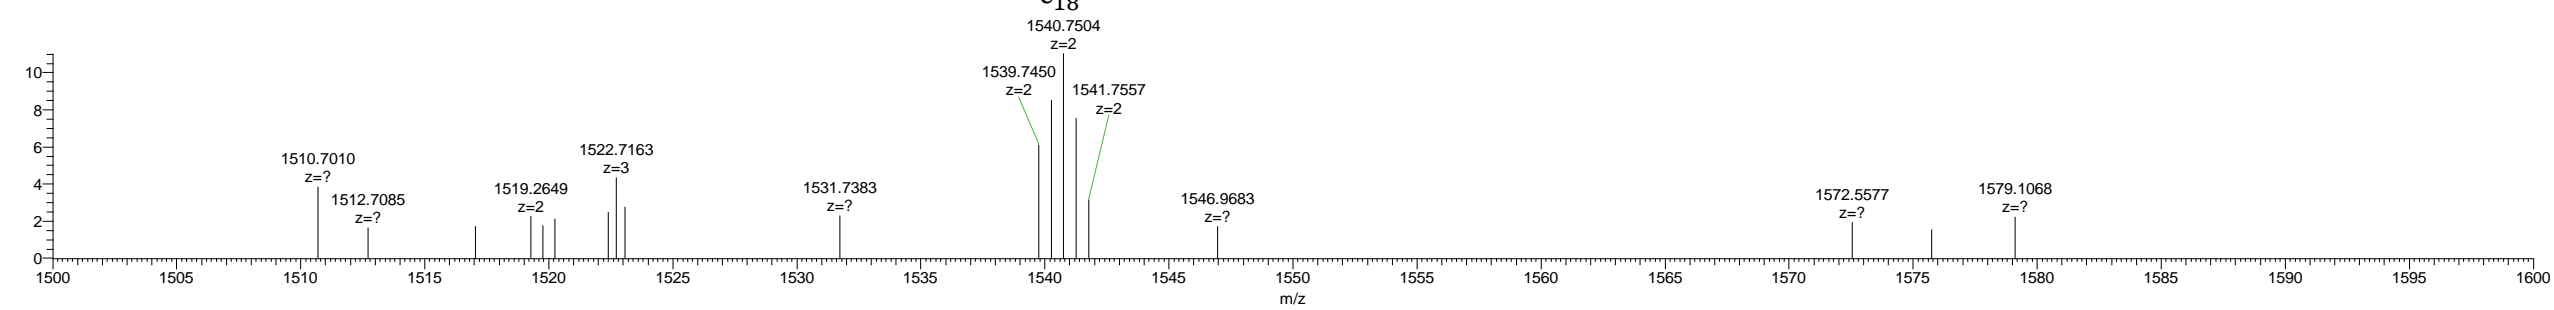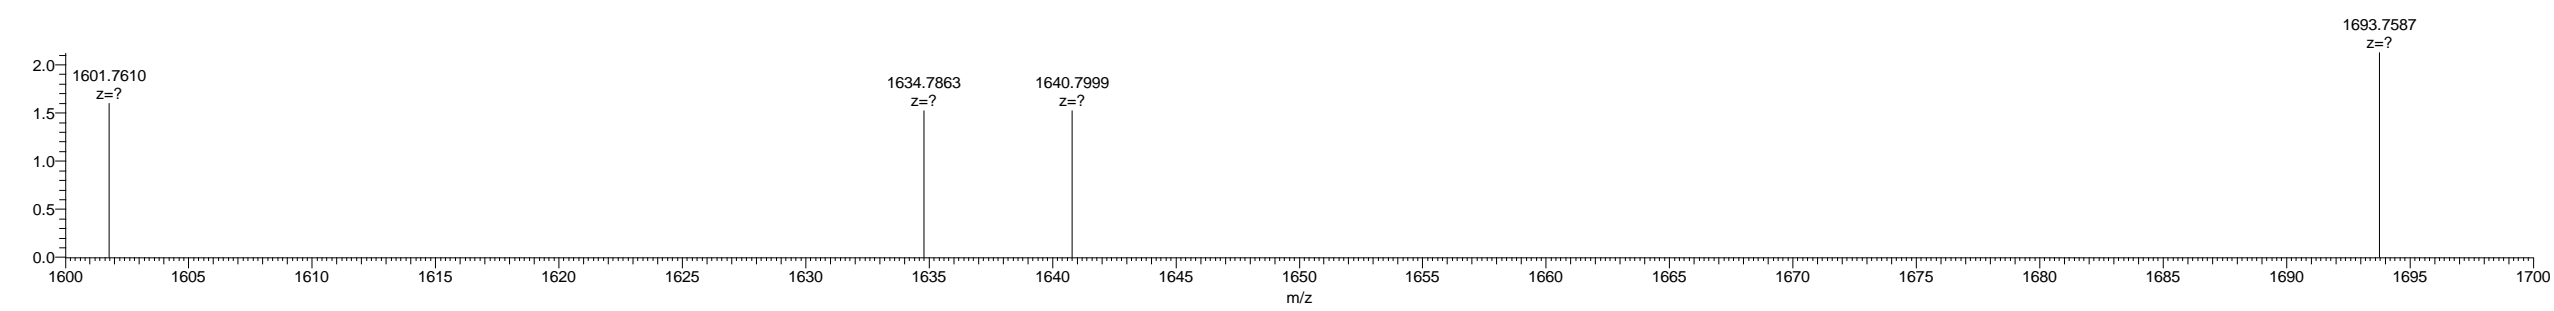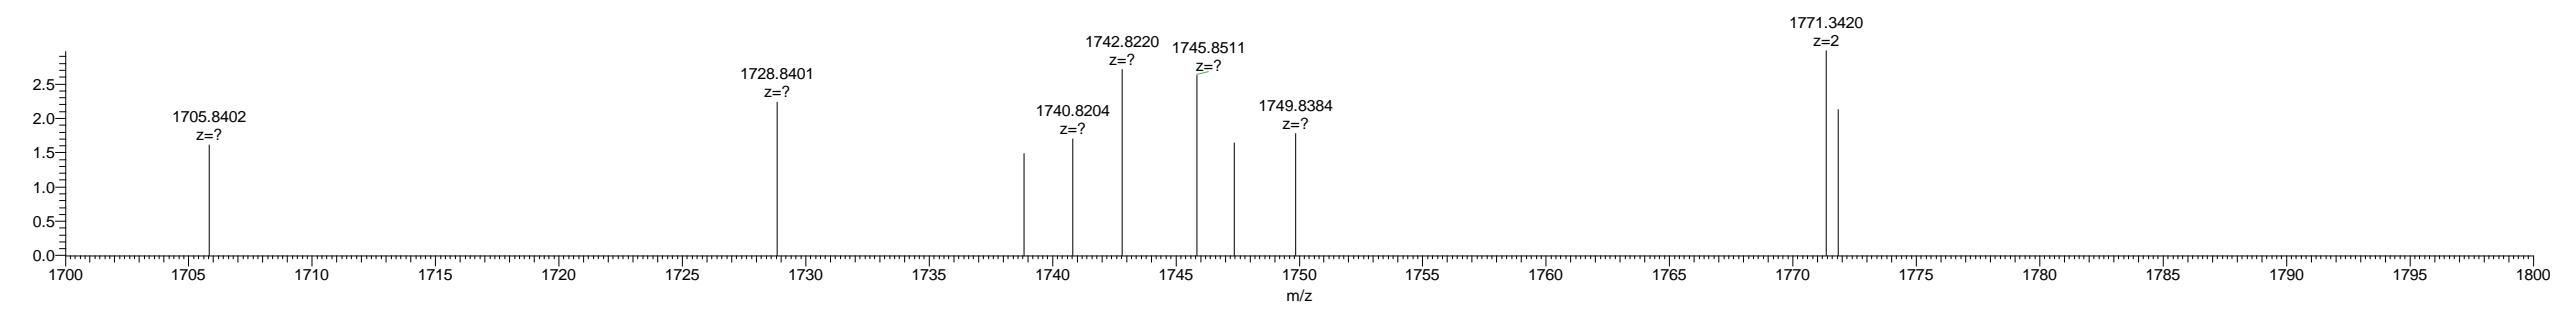

20210129\_RAD\_PepMap\_50cm\_M96\_PlusPNGaseF\_Tryp\_ETHcD #31676 RT: 100.33 AV: 1 NL: 4.30E4  
T: FTMS + c NSI d sa Full ms2 873.2172@etd16.45 873.2172@hcd15.00 [110.0000-2000.0000]

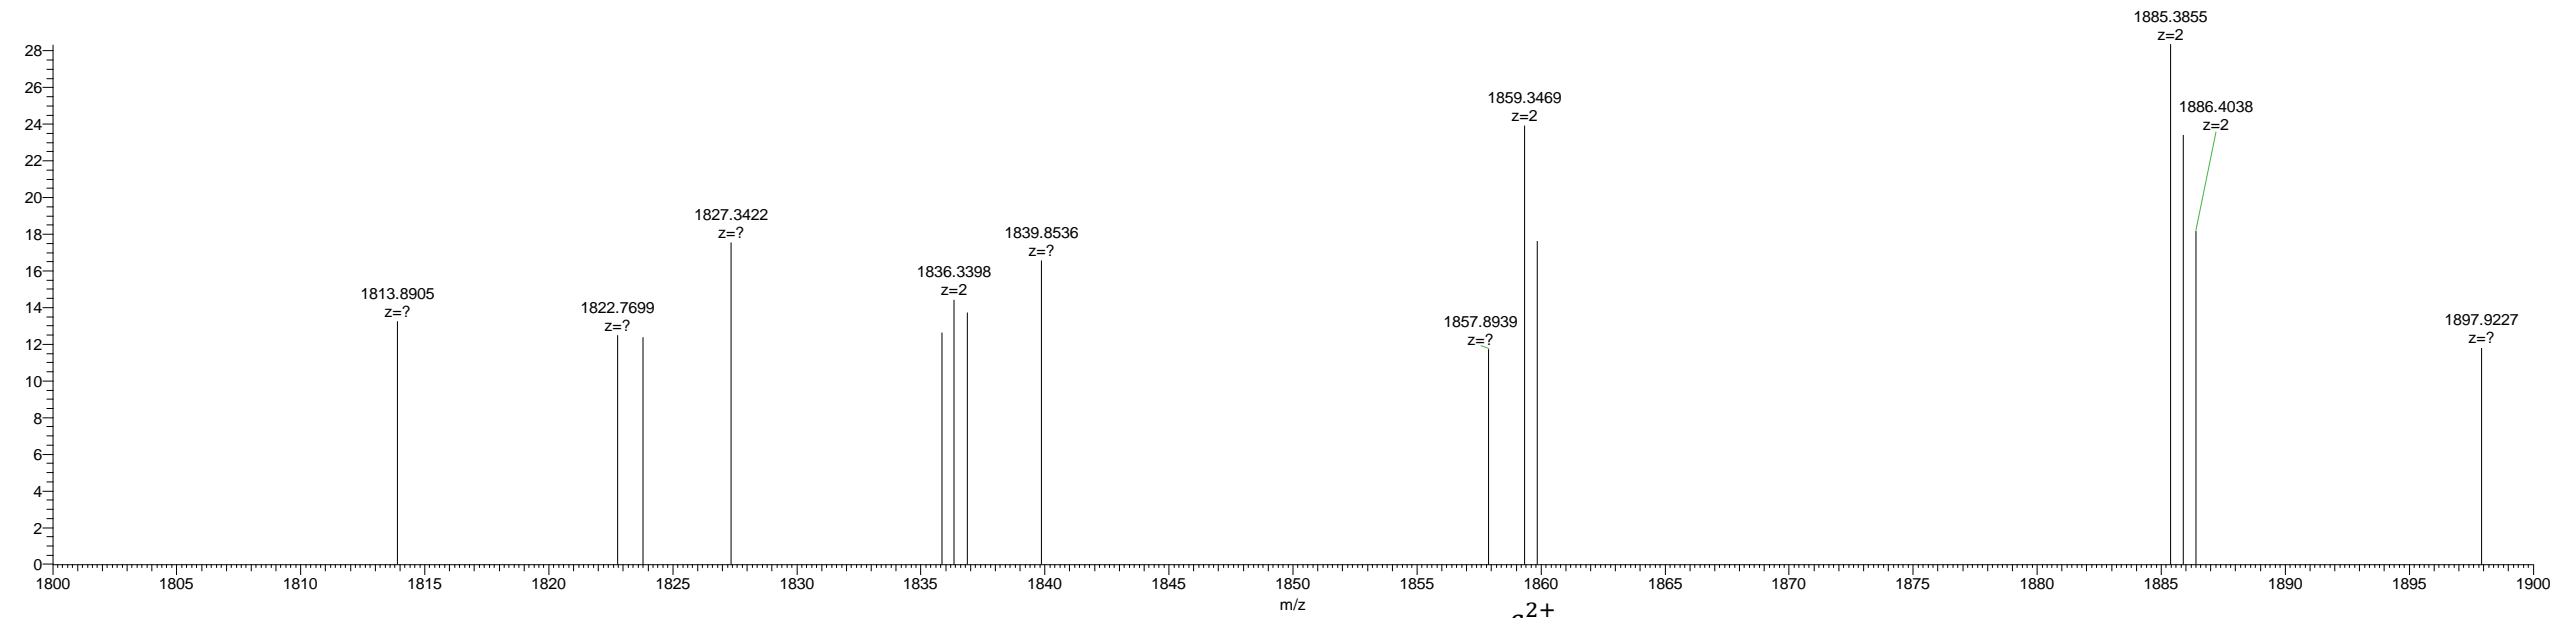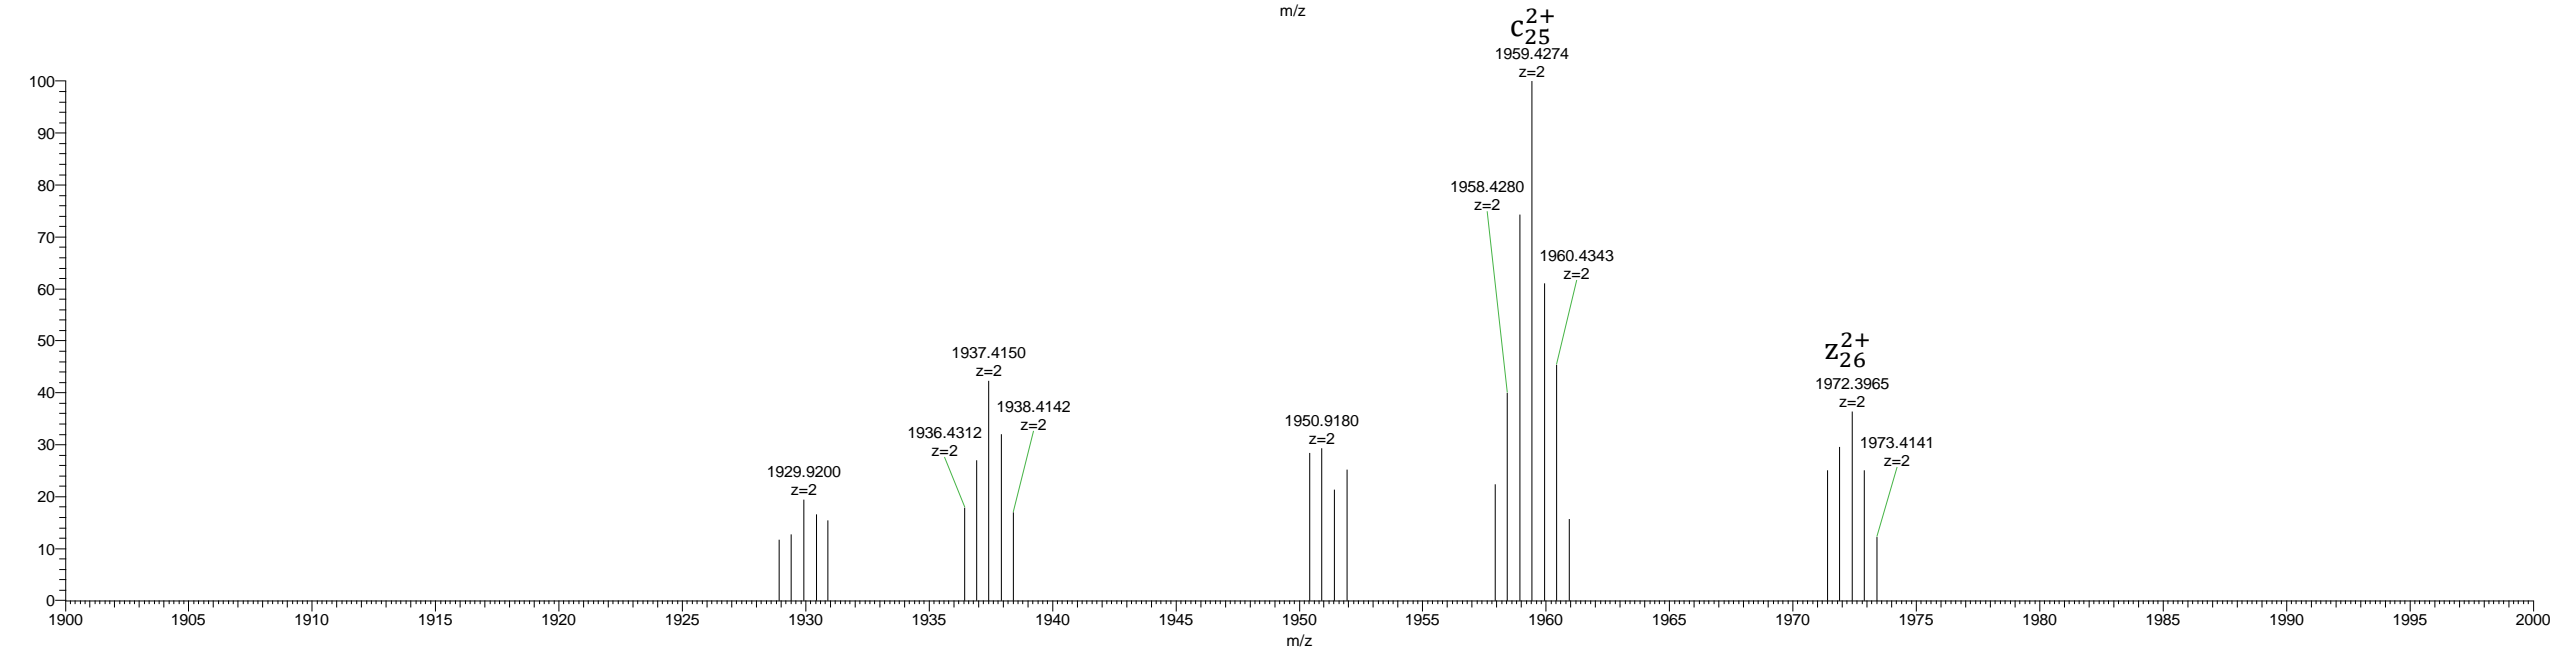

| c4+       | c3+       | c2+       | c+        |    | AA         |    | z•+       | z•2+      | z•3+      | z•4+      |
|-----------|-----------|-----------|-----------|----|------------|----|-----------|-----------|-----------|-----------|
| 42.0310   | 55.7056   | 83.0548   | 165.1022  | 1  | F          | 29 |           |           |           |           |
| 81.0563   | 107.7393  | 161.1053  | 321.2034  | 2  | R          | 28 | 4195.9513 | 2098.4793 | 1399.3219 | 1049.7433 |
| 105.8234  | 140.7621  | 210.6395  | 420.2718  | 3  | V          | 27 | 4039.8502 | 2020.4287 | 1347.2882 | 1010.7180 |
| 137.8380  | 183.4483  | 274.6688  | 548.3303  | 4  | Q          | 26 | 3940.7818 | 1970.8945 | 1314.2654 | 985.9509  |
| 162.1012  | 215.7992  | 323.1952  | 645.3831  | 5  | P          | 25 | 3812.7232 | 1906.8652 | 1271.5792 | 953.9362  |
| 424.1939  | 565.2561  | 847.3805  | 1693.7538 | 6  | T (Glycan) | 24 | 3715.6704 | 1858.3388 | 1239.2283 | 929.6731  |
| 456.4545  | 608.2703  | 911.9018  | 1822.7964 | 7  | E          | 23 | 2667.2997 | 1334.1535 | 889.7714  | 667.5804  |
| 478.2126  | 637.2810  | 955.4178  | 1909.8284 | 8  | S          | 22 | 2538.2571 | 1269.6322 | 846.7572  | 635.3197  |
| 506.4836  | 674.9757  | 1011.9599 | 2022.9125 | 9  | I          | 21 | 2451.2251 | 1226.1162 | 817.7466  | 613.5617  |
| 531.2507  | 707.9985  | 1061.4941 | 2121.9809 | 10 | V          | 20 | 2338.1411 | 1169.5742 | 780.0519  | 585.2907  |
| 570.2760  | 760.0322  | 1139.5446 | 2278.0820 | 11 | R          | 19 | 2239.0726 | 1120.0400 | 747.0291  | 560.5236  |
| 607.0431  | 809.0550  | 1213.0788 | 2425.1504 | 12 | F          | 18 | 2082.9715 | 1041.9894 | 694.9954  | 521.4983  |
| 631.3062  | 841.4059  | 1261.6052 | 2522.2032 | 13 | P          | 17 | 1935.9031 | 968.4552  | 645.9726  | 484.7312  |
| 660.0630  | 879.7482  | 1319.1187 | 2637.2301 | 14 | N (deam)   | 16 | 1838.8504 | 919.9288  | 613.6216  | 460.4680  |
| 688.3340  | 917.4429  | 1375.6607 | 2750.3142 | 15 | I          | 15 | 1723.8234 | 862.4153  | 575.2793  | 431.7113  |
| 713.5959  | 951.1255  | 1426.1846 | 2851.3619 | 16 | T          | 14 | 1610.7393 | 805.8733  | 537.5846  | 403.4403  |
| 742.1066  | 989.1398  | 1483.2060 | 2965.4048 | 17 | N          | 13 | 1509.6917 | 755.3495  | 503.9021  | 378.1784  |
| 770.3777  | 1026.8345 | 1539.7481 | 3078.4889 | 18 | L          | 12 | 1395.6487 | 698.3280  | 465.8878  | 349.6676  |
| 810.3853  | 1080.1780 | 1619.7634 | 3238.5195 | 19 | C          | 11 | 1282.5647 | 641.7860  | 428.1931  | 321.3966  |
| 834.6485  | 1112.5289 | 1668.2898 | 3335.5723 | 20 | P          | 10 | 1122.5340 | 561.7706  | 374.8495  | 281.3890  |
| 871.4156  | 1161.5517 | 1741.8240 | 3482.6407 | 21 | F          | 9  | 1025.4813 | 513.2443  | 342.4986  | 257.1258  |
| 885.6710  | 1180.5589 | 1770.3347 | 3539.6621 | 22 | G          | 8  | 878.4128  | 439.7101  | 293.4758  | 220.3587  |
| 917.9316  | 1223.5731 | 1834.8560 | 3668.7047 | 23 | E          | 7  | 821.3914  | 411.1993  | 274.4686  | 206.1033  |
| 942.6987  | 1256.5959 | 1884.3902 | 3767.7731 | 24 | V          | 6  | 692.3488  | 346.6780  | 231.4544  | 173.8427  |
| 979.4658  | 1305.6187 | 1957.9244 | 3914.8416 | 25 | F          | 5  | 593.2804  | 297.1438  | 198.4316  | 149.0755  |
| 1008.2226 | 1343.9610 | 2015.4379 | 4029.8685 | 26 | N (deam)   | 4  | 446.2120  | 223.6096  | 149.4088  | 112.3084  |
| 1025.9819 | 1367.6401 | 2050.9564 | 4100.9056 | 27 | A          | 3  | 331.1850  | 166.0961  | 111.0665  | 83.5517   |
| 1051.2438 | 1401.3226 | 2101.4803 | 4201.9533 | 28 | T          | 2  | 260.1479  | 130.5776  | 87.3875   | 65.7924   |
|           |           |           |           | 29 | R          | 1  | 159.1002  | 80.0537   | 53.7049   | 40.5305   |

$$z_{11} : \begin{array}{r} 1282.5647 \\ - \quad 90.0014 \\ \hline 1192.5633 \end{array} \quad (\bullet\text{S-CH}_2\text{-CO-NH}_2)$$
